# Supplementary material for: Economic evaluation alongside the Probiotics to Prevent Severe Pneumonia and Endotracheal Colonization Trial (E-PROSPECT): study protocol
Source: PubMed Central journal article supplement — BMJ Open. 2020 Jun 28;10(6):e036047. doi: 10.1136/bmjopen-2019-036047 (PMC7322334; doi:10.1136/bmjopen-2019-036047), 2020-06-28
Supplement: bmjopen-2019-036047.draft_revisions.pdf [file bmjopen-2019-036047.draft_revisions.pdf]

# BMJ Open

BMJ Open is committed to open peer review. As part of this commitment we make the peer review history of every article we publish publicly available.

When an article is published we post the peer reviewers' comments and the authors' responses online. We also post the versions of the paper that were used during peer review. These are the versions that the peer review comments apply to.

The versions of the paper that follow are the versions that were submitted during the peer review process. They are not the versions of record or the final published versions. They should not be cited or distributed as the published version of this manuscript.

BMJ Open is an open access journal and the full, final, typeset and author-corrected version of record of the manuscript is available on our site with no access controls, subscription charges or pay-per-view fees (<http://bmjopen.bmj.com>).

If you have any questions on BMJ Open's open peer review process please email [info.bmjopen@bmj.com](mailto:info.bmjopen@bmj.com)

# BMJ Open

## Economic Evaluation alongside the Probiotics to Prevent of Severe Pneumonia and Endotracheal Colonization Trial (E-PROSPECT): Study Protocol

|                               |                                                                                                                                                                                                                                                                                                                                                                                                                                                                                                                                                                                                                                                                                                                                                                                                                                                                                                                                                                                                                                                          |
|-------------------------------|----------------------------------------------------------------------------------------------------------------------------------------------------------------------------------------------------------------------------------------------------------------------------------------------------------------------------------------------------------------------------------------------------------------------------------------------------------------------------------------------------------------------------------------------------------------------------------------------------------------------------------------------------------------------------------------------------------------------------------------------------------------------------------------------------------------------------------------------------------------------------------------------------------------------------------------------------------------------------------------------------------------------------------------------------------|
| Journal:                      | <i>BMJ Open</i>                                                                                                                                                                                                                                                                                                                                                                                                                                                                                                                                                                                                                                                                                                                                                                                                                                                                                                                                                                                                                                          |
| Manuscript ID                 | bmjopen-2019-036047                                                                                                                                                                                                                                                                                                                                                                                                                                                                                                                                                                                                                                                                                                                                                                                                                                                                                                                                                                                                                                      |
| Article Type:                 | Protocol                                                                                                                                                                                                                                                                                                                                                                                                                                                                                                                                                                                                                                                                                                                                                                                                                                                                                                                                                                                                                                                 |
| Date Submitted by the Author: | 29-Nov-2019                                                                                                                                                                                                                                                                                                                                                                                                                                                                                                                                                                                                                                                                                                                                                                                                                                                                                                                                                                                                                                              |
| Complete List of Authors:     | <p>Lau, Vincent; Western University, Department of Medicine, Division of Critical Care</p> <p>Cook, Deborah; McMaster University,</p> <p>Fowler, Robert; Sunnybrook Research Institute, Sunnybrook Health Sciences Institute</p> <p>Rochweg, Bram; McMaster University, Medicine (Critical Care)</p> <p>Johnstone, J; University of Toronto Dalla Lana School of Public Health, Public Health Ontario</p> <p>Lauzier, François; Centre de Recherche du CHU de Québec - Université Laval, Population Health and Optimal Health Practices Research Unit (Trauma - Emergency - Critical Care Medicine)</p> <p>Marshall, John; University of Toronto, Department of Surgery</p> <p>Basmaji, John; Western University, Department of Medicine, Division of Critical Care</p> <p>Heels-Ansdell, Diane; McMaster University, Clinical Epidemiology and Biostatistics</p> <p>Thabane, Lehana ; McMaster University, Clinical Epidemiology &amp; Biostatistics</p> <p>Xie, Feng; McMaster University, Department of Clinical Epidemiology &amp; Biostatistics</p> |
| Keywords:                     | Adult intensive & critical care < INTENSIVE & CRITICAL CARE, HEALTH ECONOMICS, Infection control < INFECTIOUS DISEASES, INFECTIOUS DISEASES, Microbiology < BASIC SCIENCES                                                                                                                                                                                                                                                                                                                                                                                                                                                                                                                                                                                                                                                                                                                                                                                                                                                                               |
|                               |                                                                                                                                                                                                                                                                                                                                                                                                                                                                                                                                                                                                                                                                                                                                                                                                                                                                                                                                                                                                                                                          |

SCHOLARONE™  
Manuscripts

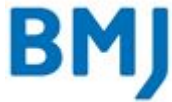

I, the Submitting Author has the right to grant and does grant on behalf of all authors of the Work (as defined in the below author licence), an exclusive licence and/or a non-exclusive licence for contributions from authors who are: i) UK Crown employees; ii) where BMJ has agreed a CC-BY licence shall apply, and/or iii) in accordance with the terms applicable for US Federal Government officers or employees acting as part of their official duties; on a worldwide, perpetual, irrevocable, royalty-free basis to BMJ Publishing Group Ltd ("BMJ") its licensees and where the relevant Journal is co-owned by BMJ to the co-owners of the Journal, to publish the Work in this journal and any other BMJ products and to exploit all rights, as set out in our [licence](#).

The Submitting Author accepts and understands that any supply made under these terms is made by BMJ to the Submitting Author unless you are acting as an employee on behalf of your employer or a postgraduate student of an affiliated institution which is paying any applicable article publishing charge ("APC") for Open Access articles. Where the Submitting Author wishes to make the Work available on an Open Access basis (and intends to pay the relevant APC), the terms of reuse of such Open Access shall be governed by a Creative Commons licence – details of these licences and which [Creative Commons](#) licence will apply to this Work are set out in our licence referred to above.

Other than as permitted in any relevant BMJ Author's Self Archiving Policies, I confirm this Work has not been accepted for publication elsewhere, is not being considered for publication elsewhere and does not duplicate material already published. I confirm all authors consent to publication of this Work and authorise the granting of this licence.

## Economic Evaluation alongside the Probiotics to Prevent of Severe Pneumonia and Endotracheal Colonization Trial (E-PROSPECT): Study Protocol

Vincent I. Lau, MD, FRCPC, Department of Medicine, Division of Critical Care Medicine, Western University, London, Ontario, Canada

Deborah J. Cook, MD, MSc, FRCPC, Departments of Medicine, Health Research Methods, Evidence, and Impact, McMaster University, Hamilton, Ontario, Canada

Robert Fowler, MDCM, MSc, FRCPC, Interdepartmental Division of Critical Care Medicine, University of Toronto, Ontario, Canada

Bram Rochweg, MD, MSc, FRCPC, Departments of Medicine, Health Research Methods, Evidence, and Impact, McMaster University, Hamilton, Ontario, Canada

Jennie Johnstone, MD, FRCPC, PhD, Public Health Ontario and Department of Laboratory Medicine and Pathobiology, University of Toronto, Toronto, Ontario, Canada

François Lauzier, MD, MSc, FRCPC, Departments of Medicine, Anesthesiology & Critical Care, Université Laval, Québec City, Québec, Canada

John C. Marshall MD, FRCSC, Department of Surgery, University of Toronto, Toronto, Ontario, Canada

John Basmaji, MD, FRCPC, Department of Medicine, Division of Critical Care Medicine, Western University, London, Ontario, Canada

Diane Heels-Ansdell, MSc, Department of Health Research Methods, Evidence, and Impact, McMaster University, Hamilton, Ontario, Canada

Lehana Thabane, PhD, Department of Health Research Methods, Evidence, and Impact, McMaster University, Hamilton, Ontario, Canada

Feng Xie, PhD, Department of Health Research Methods, Evidence, and Impact, Centre for Health Economics and Policy Analysis, Programs for Health Economics and Outcomes Measures, McMaster University, Hamilton, Ontario, Canada

Corresponding Author: Vincent I. Lau, Department of Medicine, Division of Critical Care, Schulich School of Medicine and Dentistry, Western University, 800 Commissioners Road East, London, Ontario; vinceissaclau@gmail.com

**Key Words:** Probiotics, critical care, economics, infection, PROSPECT, cost-effectiveness

**Manuscript Word Count:** 2798

**Abstract Word Count:** 299

## Abstract

### Introduction

Ventilator-associated pneumonia (VAP) is a common healthcare-associated infection in the intensive care unit (ICU). Probiotics are defined as live microorganisms that may confer health benefits when ingested. Prior randomized trials suggest that probiotics may prevent infections such as VAP and *Clostridioides difficile*-associated diarrhea (CDAD). PROSPECT (Probiotics to Prevent Severe Pneumonia and Endotracheal Colonization Trial) is a multicenter, double-blinded, randomized controlled trial comparing the efficacy of the probiotic *Lactobacillus rhamnosus* GG with usual care versus usual care without probiotics in preventing VAP and other clinically important outcomes in critically ill patients admitted to the ICU.

### Methods and Analysis

The objective of E-PROSPECT is to determine the incremental cost-effectiveness of probiotics with usual care versus usual care without probiotics in critically ill patients. E-PROSPECT will be performed from the public healthcare payer's perspective over a time horizon from ICU admission to hospital discharge.

We will determine probabilities of in-ICU and in-hospital events from all patients alongside PROSPECT. We will retrieve unit costs for each resource use item using jurisdiction-specific public databases, supplemented by individual site unit costs if such databases are unavailable. Direct costs will include medications, personnel costs, radiology/laboratory testing, operative/non-operative procedures and per-day hospital 'hotel' costs not otherwise encompassed. The primary outcome is the incremental cost per VAP prevented between groups. Other clinical events such as CDAD, antibiotic-associated diarrhea (AAD), and in-hospital mortality will be included as secondary outcomes. We will perform pre-specified subgroup analyses (medical/surgical/trauma; age; frailty status; antibiotic use; prevalent vs. no prevalent pneumonia) and probabilistic sensitivity analyses, then generate confidence intervals using non-parametric bootstrapping.

### Ethics and Dissemination

Study approval was granted by the Hamilton Integrated Research Ethics Board (HIREB) of McMaster University on July 29, 2019. Informed consent was obtained from the patient/substitute decision maker. Findings of this study will be published in peer-reviewed journals.

## Article Summary

### Article focus

- Ventilator-associated pneumonia (VAP) is a common healthcare-associated infection in the intensive care unit, with high clinical and economic burden to health systems.
- This protocol manuscript outlines the methods for investigating and reporting the cost-effectiveness of the probiotic *Lactobacillus rhamnosus* GG with usual care versus usual care without probiotics for prevention of healthcare-associated infections.

### Key messages

- This protocol for an economic evaluation alongside a randomized control trial, provide decision-makers and stake-holders in health policy with information about the cost-effectiveness of an intervention.

### Strengths and limitations of this study:

- The strengths of this protocol paper ensure the methods used in the economic evaluation: are transparent; reduce hypothesis-driven bias with an pre-specified *a priori* protocol; utilize trial randomization, reducing bias and confounding according to different baseline characteristics between study groups; collect clinical and economic data concurrently and prospectively, to reduce of data collection and minimize the possible problem of missing data if attempting to collect retrospectively; collection of data from multiple jurisdictions, to allow for capture of variability and enhance the generalizability of our results.
- The limitations of this protocol paper are: a relatively short, non-fixed time-horizon; a primary outcome of incremental cost to avoid a clinical event (cost-effectiveness approach), rather than a cost-utility approach (incremental cost per quality-adjusted life year); as with all efficacy trials, the generalizability and external validity of a health economic evaluation concurrently performed with a randomized control trial may not represent the same treatment effects and costs as in routine clinical practice.

## Background

Ventilator-associated pneumonia (VAP) is the most common healthcare-associated infection in the intensive care unit (ICU), resulting in a high burden of illness.[1,2] A 2005 systematic review found a pooled cumulative VAP incidence of 23% (95% confidence interval (CI): 19%–27%) in randomized controlled trials (RCTs) and 10% (95% CI: 7–13%) in observational studies.[2] In addition, VAP is associated with a two-fold attributable risk of dying in the ICU (odds ratio (OR) 2.02, 95% CI: 1.2–3.6), and the cost attributed to VAP ranges from US \$10,000 to \$13,000 per patient.[2] Thus, VAP prevention is a patient-important safety goal during critical illness.[1,3,4]

Probiotics are defined as “live microorganisms which, when administered in adequate amounts, confer a potential health benefit on the host.”[5,6] They are reported to enhance gut barrier function, reduce host pathogenic bacterial load, modify gut microbiota, and modulate the immune system.[7–10] Probiotics studies suggest benefits including reduced incidence of healthcare-associated infections.[11–14] A recent meta-analysis of RCTs suggests that probiotics administered to critically ill mechanically ventilated patients were associated with a 26% lower VAP rate (95% CI: 10–39%) and 20% lower infection rates overall (95% CI: 5–32%).[15] However, these findings arose from 30 small, mostly low quality single-center RCTs (n=18–300, 2972 total patients in the meta-analysis), yielding imprecise estimates and results with uncertain internal and external validity.[15]

Further, probiotics may reduce the incidence of diarrhea, specifically *Clostridioides difficile*-associated diarrhea (CDAD), which can cause serious complications such as pseudomembranous colitis, toxic megacolon, and death.[16] In a recent Cochrane systematic review and meta-analysis of 31 RCTs including 8672 patients who were receiving antibiotics and concurrent probiotics, moderate certainty evidence suggested that probiotics were effective at reducing the burden of CDAD for patients and the healthcare system.[16]

We recently performed a systematic review of economic evaluations examining probiotics in hospitalized patients, evaluating their cost-effectiveness for reducing VAP, CDAD and antibiotic-associated diarrhea (AAD), while also identifying variables that could drive costs.[17] From 721 potentially relevant studies, 7 met the eligibility criteria. Probiotics appear to be either cost-effective or cost-saving in 6 of 7 studies compared to other prophylactic strategies within usual care to prevent healthcare-associated infection in acutely ill hospitalized patients. However, Grading of Recommendations Assessment, Development and Evaluation (GRADE) evaluations indicated a high risk of bias and very low quality/certainty of clinical evidence, such that cost-effectiveness evidence on the use of probiotics in adult hospitalized patients was weak. Furthermore, probiotic manufacturers funded 3 of 7 (43%) studies, all of which were reported as either cost-effective or cost-saving.[17] Some probiotic economic evaluations were designed after the results of the trial were published.

Therefore, we have designed this economic evaluation (E-PROSPECT) alongside the multicenter PROSPECT (ClinicalTrials.gov number: NCT01782755), assessing the incremental cost effectiveness ratio (ICER) of probiotics versus usual care for critically ill adult patients.[18–20]

## METHODS

---

## Overview of PROSPECT

PROSPECT is a randomized, double-blinded multicenter controlled trial. It used a central system for concealed 1:1 ratio to randomize patients (in variable unspecified block sizes, stratified by center and by medical, surgical or trauma admission status) to either  $1 \times 10^{10}$  colony forming units (CFU) of *L. rhamnosus* GG (iHealth, Inc.) or an identical placebo suspended in tap water administered twice daily via feeding tube in the ICU.[20] PROSPECT has enrolled 2653 critically ill patients between October 2013 and March 2019 throughout 44 ICUs (41 in Canada, 2 in the United States and 1 in Saudi Arabia). Patients, healthcare providers, investigators and research personnel were all blinded to group allocation. Sample size calculation has been previously described.[18–20]

## E-PROSPECT design

The primary objective of E-PROSPECT is to estimate the incremental cost per VAP prevented arising from a prevention strategy of using probiotics with usual care (the probiotics arm) versus usual care without probiotics (the usual care arm) during hospitalization. Our secondary analyses of ICERs include healthcare-associated complications (CDAD, AAD) and mortality.[18–20]

Our economic evaluation will be performed from the public healthcare payer's perspective,[21] over the time horizon of the ICU admission to hospital discharge or death (Table 1). Our economic evaluation protocol was developed (Table 1) according to established CHEERS (Consolidated Health Economic Evaluation Reporting Standards) and international cost-effectiveness analysis (CEA) guidelines.[22,23]

## Clinical outcomes

Clinical outcomes that will be examined in E-PROSPECT are described with definitions in Supplemental Table 1 that were previously described from PROSPECT [20]. Clinical events such as VAP (primary outcome), CDAD, AAD and hospital mortality (secondary outcomes) will be gleaned from PROSPECT.

## Health care resource utilization

Based on our systematic literature review[17] and published evidence[18–20], we identified a list of relevant health care resource items that includes medications, physician/personnel utilization, diagnostic radiology/laboratory testing, and operative/non-operative procedures and per-day hospital 'hoteling' costs not otherwise encompassed. Antimicrobial use in ICU will be defined as days of therapy (DOT), defined daily dose (DDD) of therapy and antimicrobial-free days (AFDs).[24,25] Only systemic antimicrobials will be captured whether prophylactic or therapeutic in intent. Topical creams, eye/ear drops and inhaled antimicrobials will be excluded. We will also document the duration of mechanical ventilation, ICU and hospital length of stay and mortality. The health care resource uses will be collected alongside PROSPECT. For missing resource use data, we will choose appropriate imputation methods according to the type and distribution of the missing data. [26,27].

## Unit costs

Unit costs for health care resource items will be identified through jurisdiction-specific (regions/provinces/states which manage health care delivery in their area) public databases (e.g. pharmacy drug formularies, physician billing schedule of benefits, Medicare/Medicaid reimbursement manuals, labour department wages/salaries, manufacturer costs). When there is a small sample or distribution of unit costs (i.e. a provincial jurisdiction may have the same cost for a particular procedure), we will estimate the standard error if possible, or incorporate a  $\pm 25\%$  error around the mean unit cost distribution.



1  
2  
3 For unit costs not represented in public databases, we will obtain site-specific unit costs  
4 from the participating PROSPECT sites. We will first conduct a pilot study of unit cost  
5 acquisition at a convenience sample of 8 participating centers (Canadian: British Columbia,  
6 Alberta, Manitoba, Ontario, Québec, Nova Scotia; US: Minnesota, Missouri; and Saudi Arabia)  
7 to request a list of unit costs (Supplemental Table 2). The site investigator or research  
8 coordinator will then contact the most appropriate individual in each hospital's accounting,  
9 human resources, pharmacy, radiology or laboratory departments to obtain the unit costs. [28]  
10 In all cases, costs will be requested (if available). If only charges are known, then we will  
11 attempt to convert to costs by the institution's cost-to-charge estimate for that item, where it  
12 exists [28].  
13

14 Direct costs will be presented in the pre-specified cost categories (Supplemental Table  
15 2). Assumptions regarding resource utilization are presented in Supplemental Table 3. We will  
16 assess direct unit costs for study product-related resources associated with outcomes of VAP,  
17 CDAD, AAD and mortality. If a specific line-item unit cost is not attainable for a specific  
18 jurisdiction,[28] we will: 1) ask another site within the same jurisdiction for missing unit costs; 2)  
19 derive a cost-ratio from acquired line-items (i.e. drug costs both known in 2 jurisdictions), then  
20 using the cost-ratio impute the missing line-item unit costs for the missing jurisdiction (by  
21 multiplying the cost-ratio against a known jurisdiction's acquired line-item to impute the line-item  
22 unit cost for the missing jurisdiction).  
23

24 The pilot phase may inform amendments to our protocol. For example, if a unit cost for a  
25 particular line-item is deemed to be small and/or has a low clinical incidence rate, then that line-  
26 item may be removed from the final analysis. Items without a difference in clinical  
27 outcome/resource utilization between intervention and control groups but which contribute  
28 substantially to costs may still be retained (even if little to no incremental difference in costs  
29 would exist between the two arms) in order to maintain face validity and accurately reflect the  
30 magnitude of costs for hospitalization of a critically ill patient. Once the list of line-items has  
31 been pared down to those which are deemed to be cost drivers, and clinically relevant while  
32 also feasible to obtain, the remaining line-item list will be surveyed across a sampling of  
33 individual sites from each representative jurisdiction from PROSPECT.

34 Unit cost data will be summarized among all sites, and by country, to explore variability  
35 across centers and countries and to improve the generalizability of results. Visible outliers will  
36 be reconfirmed with individual hospital contacts. Participating sites will be queried to determine  
37 if particular costs have changed substantially (for example, by more than 25%), beyond  
38 inflationary or deflationary changes, over the course of the study. If there are substantial  
39 changes that have occurred over time, we will use the mean unit costs adjusted for inflation over  
40 the mean duration of the trial.[28]  
41

## 42 **Cost analysis**

43 The cost for each resource use item will be calculated by multiplying the natural  
44 resource utilization units by the unit cost. The total cost per patient will be the sum of the cost of  
45 items utilized from the time of randomization until discharge from hospital or death. All costs will  
46 be converted to 2019 United States dollars, accounting for annual inflation. [29–33]  
47

48 We plan on using international currency conversion, instead of purchase power parity  
49 (PPP)-based conversions, because health-specific PPPs are not available for all participating  
50 countries, and non-health PPP conversion rates vary substantially over the period of the  
51 analysis.[30] Country-specific costs will be considered only in sensitivity analyses.

52 Incremental costs will be calculated using the difference in mean per patient cost  
53 between the two treatment arms. We have developed a costing operations manual outlining this  
54 process (Supplemental Appendix 1: E-PROSPECT costing manual). [30]  
55

## 56 **Base-Case Cost Effectiveness Analyses**

57  
58  
59  
60

Means (standard deviations) or frequency (percentage) will be used to describe effect and cost estimates wherever appropriate. Chi-square tests and two-sample t-test comparisons will be used as appropriate to compare baseline characteristics between the two arms. The primary outcome will be based on the intention-to-treat principle and will form the clinical event estimates for the economic evaluation.

The base case incremental cost-effectiveness ratio (ICER) is the ratio of incremental costs per VAP prevented of probiotics versus usual care during the period of hospitalization (from ICU admission to hospital discharge or death). In secondary analysis we will also calculate ICER using other clinical outcomes (i.e., CDAD, AAD, mortality). If there is dominance in cost effectiveness (i.e. one treatment is better at lower cost than the other treatment), we will present the difference in cost and effect separately, without calculating the ICER for the base case analysis. When there is no difference in clinical outcomes, we will present incremental cost and effects separately, without calculating an ICER for the base case analysis.

### **Subgroup analyses**

As subgroup analyses, we will investigate specific patients who may have differential effects and costs as compared to the entire population, including: diagnostic category (medical, surgical, trauma) [2]; age <65 years, 65-75 years and >75 years [34,35]; frailty status (baseline Clinical Frailty Score  $\geq 5$  of 9 versus) [36]; patients who received/did not receive antibiotics within 2 days of randomization [20]; prevalent (present at the time of enrollment) vs. no prevalent pneumonia [20].

### **Uncertainty analyses**

Because patient characteristics and costs may differ in different jurisdictions and outside clinical trials settings, and there will be uncertainty associated in the estimation of each group's clinical outcomes and separately in the associated group's costs, we have prospectively planned an uncertainty analysis to explore how ICERs may change with plausible ranges in costs of probiotics.

To test the robustness of our results (and determine the uncertainty associated with cost and effects estimation), we will perform a probabilistic sensitivity analysis of pairs of known costs and effects, using non-parametric bootstrapping techniques to generate 95% confidence intervals. We will perform 1000 bootstrap simulations in the following manner: each simulation will draw the same number of patients per group (as per intention-to-treat), with replacement (for both events and cost) in pairs. For each sample, the difference in event rate and cost was calculated, obtaining 1000 pairs of differences in cost and event rate. [37,38] Cost effectiveness acceptability curves will be used to present the probability of probiotics being cost effective over a wide range of willingness-to-pay thresholds [21].

Scenario analyses will also be performed with variations of estimates of pairs of potentially influential variables (i.e. costs of probiotics, per day cost of care in ICU and hospital wards) across plausible ranges (variation of costs: 50-150%) to explore potential cost differences in higher- and lower-spending health care jurisdictions to determine if different estimates change the overall results.

All analyses will be undertaken using Excel (Microsoft Corp, Redmond Washington, US), and SAS (Cary, North Carolina, US).

### **Patient and Public Involvement**

Patients or the public were not involved in the development of the research question, design, or conduct, or reporting, or dissemination plans of our research. The burden of the intervention was not assessed the patients themselves.

### **Ethics and Dissemination**

1  
2  
3 Research ethics approval for E-PROSPECT was granted by the Hamilton Integrated  
4 Research Ethics Board (HIREB) of McMaster University (project identifier: REB#:15-322).  
5 Informed consent was obtained from each participant in PROSPECT, or their substitute  
6 decision-maker, in accordance with local REB approvals. We anticipate that a majority of sites  
7 participating in E-PROSPECT will consider central HIREB approval as satisfactory to obtain  
8 additional non-specific patient-based costing data from their center. All economic data, as with  
9 trial data, will be de-identified, maintained in a password-protected and encrypted laptop or  
10 desktop, in locked offices. All de-identified datasets, technical appendices and statistical code  
11 will be published alongside the economic evaluation. Knowledge translation of the results will be  
12 disseminated to patients, public and healthcare providers through peer-review journals.  
13  
14  
15

## 16 Discussion

17 PROSPECT is the largest trial undertaken of probiotic usage for VAP prophylaxis in  
18 critically ill patients. Although probiotics have been shown in prior trials to prevent VAP and  
19 CDAD, their relative effects, side-effects and cost-effectiveness remain uncertain. PROSPECT  
20 will determine whether probiotics reduce the frequency of VAP and other healthcare-associated  
21 complications during critical illness.[18–20]

22 An economic evaluation jointly considers both costs and effects between alternative  
23 treatment options. Thus, physicians, administrators and policy-makers can know whether a new  
24 treatment provides good value for the healthcare expenditure. E-PROSPECT will answer these  
25 questions and address the cost-effectiveness of probiotics for VAP prevention. The literature  
26 currently has a paucity of health economic evaluations, illustrating the importance of E-  
27 PROSPECT.[39]  
28

## 29 Strengths and Limitations

30 Some aspects of our methodology have potential limitations. First, the time-horizon is  
31 relatively short, with no outpatient follow-up (only reporting in-hospital outcomes). Other studies  
32 have utilized relative, non-fixed time horizons in health economic evaluations,[40] including  
33 those investigating probiotics.[41,42] We will carefully interpret these cost-effectiveness ratios in  
34 context from the short time horizon. Second, our primary outcome is the incremental cost to  
35 avoid a VAP event and other clinically important outcomes, not the incremental cost per quality-  
36 adjusted life year gained in a cost-utility analysis [21]. PROSPECT is not designed to measure  
37 long-term outcome or downstream life expectancy (hence no lifetime time horizon). However, if  
38 PROSPECT shows a difference in hospital survival due to probiotics, this will be addressed as a  
39 secondary outcome. As with all efficacy trials, the generalizability and external validity of a  
40 health economic evaluation concurrently performed with an RCT may not represent the same  
41 treatment effects and costs as in routine clinical practice.  
42

43 E-PROSPECT has several advantages.[43] First, we reduce the potential for investigator  
44 hypothesis-driven biases by pre-specifying our parameters of analysis (subgroup and sensitivity  
45 analysis) for the health economic evaluation prior to unblinding of the trial. Second, trial  
46 randomization can reduce bias and confounding according to different baseline characteristics  
47 between study groups. Third, the concurrent collection of clinical and economic data can reduce  
48 the costs of data collection and minimize the possible problem of missing data if attempting to  
49 obtain it retrospectively. Fourth, we have chosen to gather costs from healthcare systems from  
50 multiple countries participating in the PROSPECT trial. We anticipate a wide variability in  
51 institutional reporting patient-specific cost accounting.[28,40] Although this has the potential to  
52 introduce variability in cost estimates, this approach will also likely enhance the generalizability  
53 of our results. Finally, timely economic data can be useful to healthcare policy-makers to aid in  
54 resource allocation decisions. There are several clinician-researchers that are advocating for  
55 the embracing the science of value in healthcare,[44] while others state that cost-effectiveness  
56  
57  
58

analysis should be mandatory in clinical-effectiveness research to aid in clinical guideline development and public healthcare decision policy.[45] By conducting our economic analysis concurrent with the PROSPECT trial, we take advantage of each of these strengths.[28]

### Article Summary

In summary, probiotics represent an intervention to consider for VAP prevention. As a randomized trial, PROSPECT will determine the balance of effects, side effects and complications of probiotics for prophylaxis against healthcare-associated infections amongst medical-surgical ICU patients, but leaves unanswered the consequences that probiotic administration would have on the costs of caring for patients with critical illness. E-PROSPECT will complement PROSPECT with a pre-specified prospective economic evaluation.

### Acknowledgements

This economic evaluation (E-PROSPECT) and PROSPECT is funded by the CIHR, McMaster University, St. Joseph's Healthcare Hamilton, Canadian Frailty Network, Physicians Services Incorporated of Ontario, the Hamilton Academic Health Sciences Organization and the Academic Medical Organization of Southwestern Ontario. DJC is a Canada Research Chair of the Canadian Institutes of Health Research. Study products were donated by i-Health, Inc., the manufacturers of *L. rhamnosus* GG; however, no funding for either the trial itself or the economic evaluation was received from the manufacturers of any probiotic or other agent involved in VAP prevention or treatment.

None of the funders played a role in the conception, design, conduct, oversight, analysis, interpretation or decision to submit this manuscript for publication or in the preparation, review or approval of the manuscript.

PROSPECT was designed by the PROSPECT Steering Committee and improved by Drs. Dawn Bowdish and Erick Duan, the PROSPECT Investigators and Research Coordinators and the Canadian Critical Care Trials Group. We are grateful for the commitment of all our colleagues in participating centers, and staff at the Methods Center for their expertise including Nicole Zytaruk, Lois Saunders, Shelley Anderson-White, Mary Copland, Megan Davis, France Clarke and Alyson Takaoka.

### Participating Centers

#### PROSPECT Collaborators

##### Canada

##### **St Joseph's Healthcare, Hamilton, ON**

Dr Deborah Cook (Lead); Dr Erick Duan, Dr Mark Soth, (Co-Investigators); France Clarke, Mary Copland; Neala Hoad, Marnie Jakob, Melissa Shears, Alyson Takaoka, Nicole Zytaruk (Research Coordinators); Christa Connolly, Denise Davis, Catherine Eaton, Tracy Gallinas, Jean Lee-Yoo, Connie Lukinuk, Leia Musielak, Nancy Pavunkovic, Joy Pelayo, Kaitlyn Phillips, Catherine Pracsovics, Julia Raimondo, Vida Stankus, Christine Wallace, Angela Wright, Crystal Young (Pharmacy).

##### **Hamilton General Hospital, Hamilton Health Science Center, Hamilton, ON**

Dr Maureen Meade (Lead); Dr Emilie Belley-Cote (Co-Investigator) Katrina Fimiani, Lori Hand, Dr Harjot Jagdey, Lisa Klotz, Alexandra Sabev, Nevena Savija (Research Coordinators); Deanne Cosentino, Diane Lourenco, Julie Misina, Gita Sobhi (Pharmacy).

**Juravinski Hospital Hamilton Health Science Centre, Hamilton, ON**

Dr Timothy Karachi (Lead), Dr Bram Rochweg (Co-Investigator); Mashari Alghuroba, Alia Khaled, Lauren Locco, Tina Millen, Ryan Vaisler (Research Coordinators); Maya Biljan, Deanne Cosentino, Brittany Marriott, Gita Sobhi (Pharmacy).

**St Michael's Hospital, Toronto, ON**

Dr John Marshall (Lead); Dr Jan Friedrich (Co-Investigator); Jennifer Hodder, Imrana Khalid, Julie Lee, Yoon Lee, Pragma Roy, Kurtis Salway, Gyan Sandhu, Marlene Santos, Orla Smith, Melissa Wang (Research Coordinators); Norman Dewhurst, Ann Dowbenka, Ann Kosinski, Terri Norrie, Ranjit Parhar, Laura Parsons, Johanna Proceviat, Gitana Ramonas, Mae Yuen (Pharmacy).

**St Paul's Hospital, Vancouver BC**

Dr Peter Dodek (Lead); Dr Najib Ayas (Co-Investigator); Maria Agda, Victoria Alcuaz, Betty Jean Ashley, Kelsey Brewer, Janice Palmer (Research Coordinators); Glen Brown, Mara Pavan (Pharmacy).

**Mount Sinai Hospital, Toronto, ON**

Dr Geeta Mehta (Lead), Dr Stephen Lapinsky, Dr Laveena Munshi; Maedean Brown, Brittany Giacomino, Marnie Jakab, Alan Kraguljac, Sumesh Shah, Erik Tamberg, Laura Vergeer (Research Coordinators); Doret Cheng, Gagan Grewal, Andrew Han, Holly Leung, Ioanna Mantas, Hilary Rodrigues, Andrew Wyllie (Pharmacy).

**CHU de Québec-Université Laval (Hôpital de l'Enfant-Jésus), Québec City, QC**

Dr François Lauzier (Lead); Dr Alexis Turgeon (Co-Investigator); Danny Barriault, David Bellemare, Anick Boivin, Sarah-Judith Breton, Ève Cloutier, Marjorie Daigle, Charles Delisle-Thibeault, Panagiota Giannakouros, Stéphanie Grenier, Gabrielle Guilbault, Caroline Léger, Catherine Ouellet, Marie-Claude Tremblay (Research Coordinators); Élisabeth Gagne, Julie Gaudreau, Claire Grégoire, Véronique Labbé, Ariane Laprise-Rochette, Caroline Ouellet, Mélanie Samson, Marie-David Simoneau, Virginie Turcotte, Tuong-Vi Tran (Pharmacy).

**Ottawa Civic Hospital, Ottawa, ON**

Dr Lauralyn McIntyre (Lead) Dr Joe Pagilarello (Co-Investigator); Pierre Cardinal, Gianni D'Egidio, Shane English, Mike Hartwick, Jonathon Hooper, Gwynne Jones, John Kim, Dal Kubelik, Kwadwo Kyeremanteng, Hilary Meggison, Sherissa Microys, Dave Neiliovitz, Guiseppe Pagliarello, Rakesh Patel, Jo Po, Peter Reardon, Erin Rosenberg, Aimee Sarti, Andrew Seely (Co-Investigators); Shelley Acres, Brigitte Gomes, Heather Langlois, Liane Leclair, Sydney Mieztitis, Kaitlyn Montroy, Rebecca Porteous, Shawna Reddie, Irene Watpool (Research Coordinators); Wendy Aikens, Marianne Cox, Ann-Marie Dugal, Susan Fetzer, Kathy Fraser, Jennifer Kuhn, Rob MacLeod, Susanne Richard, Dawn Rose, Sherry Weir (Pharmacy).

**Ottawa General Hospital, Ottawa, ON**

Dr Lauralyn McIntyre (Lead), Dr Pierre Cardinal, Dr Gianni D'Egidio, Dr Shane English, Dr Mike Hartwick, Dr Jonathon Hooper, Dr Gwynne Jones, Dr John Kim, Dr Dal Kubelik, Dr Kwadwo Kyeremanteng, Dr Hilary Meggison, Dr Sherissa Microys, Dr Dave Neiliovitz, Dr Guiseppe Pagliarello, Dr Rakesh Patel, Dr Jo Po, Dr Peter Reardon, Dr Erin Rosenberg, Dr Aimee Sarti, Dr Andrew Seely (Co-Investigators); Shelley Acres, Heather Langlois, Liane Leclair, Sydney Mieztitis, Kaitlyn Montroy, Rebecca Porteous, Shawna Reddie, Amanda Van Beinum, Allyshia Van Tol, Irene Watpool (Research Coordinators); Wendy Aikens, Anne-Marie Dugal, Susan Fetzer, Sherry Weir (Pharmacy).

**Vancouver General Hospital, Vancouver, BC**

Dr Bill Henderson (Lead), Dr Donald Griesdale, Dr Mypinder Sekhon (Co-Investigators); Denise Foster, Suzie Logie (Research Coordinators); Judy Yip (Pharmacy).

**University Health Network, Toronto Western Hospital, Toronto, ON**

Dr Margaret Herridge (Lead), Drs Alberto Goffi, Dr Eyal Golan, Dr John Granton, Dr Victoria McCredie, Dr Elizabeth Wilcox (Co- Investigators); Jaimie Archer, Daniel Chen, Paulina Farias, Brooke Fraser, Cheryl Geen-Smith, Barbara Kosky, Andrea Matte, Christina Pugliese, Priscila Robles, Lia Stenyk, Cristian Urrea, Karolina Walczak (Research Coordinators); Kyung Ae, Jane Ascroft, Fatima Haji, Rajvinder Kaur, Jane Lui, Sophia Mateo, Nga Pham, Tam Pham, Matthew Suen, Jennifer Teng (Pharmacy).

**Vancouver Island Health Authority, Vancouver, BC**

Dr Gordon Wood (Lead), Dr Daniel Ovakim (Co-Investigator); Fiona Auld, Gayle Camey, Ralph Fleming, Jennifer Good, Mandeep Manhas (Research Coordinators); Karin Boyd, Jane Dheere (Pharmacy).

**Toronto General Hospital, Toronto, ON**

Dr Margaret Herridge (Lead), Dr Eyal Golan, Dr John Granton, (Co-Investigators); Jaimie Archer, Daniel Chen, Brooke Fraser, Cheryl Geen-Smith, Andrea Matte, Priscilia Robles, Cristian Urrea (Research Coordinators); Jane Ascroft, Fatima Haji, Jie Meng, Matthew Suen, Muhammad Walid, Jill Westlund (Pharmacy).

**Centre intégré universitaire de santé et de services sociaux du Nord-de-l'Île-de-Montréal (Hôpital du Sacré-Cœur de Montréal), Montréal, QC**

Dr Emmanuel Charbonney (Lead) Dr Yoan Lamarche, Dr Soazig Leguillan, Dr Karim Serri, Dr Colin Verdant, Dr Yanick Beaulieu, Dr Patrick Bellemare, Dr Philippe Bernard, Dr Marc Giasson, Dr Véronique Brunette, Dr Alexandros Cavayas, Dr Émilie Lévesque, (Co-Investigators); Halina Labikova, Julia Lainer Palacios, Marie-Ève Langlois, Virginie Williams (Research Coordinators); Thuy Anh Nguyen, Valérie Phaneuf, David Williamson (Pharmacy).

**Centre intégré universitaire de santé et de services sociaux de l'Estrie - Centre hospitalier universitaire de Sherbrooke, Sherbrooke, QC**

Dr François Lamontagne (Lead), Dr Frédérick D'Aragon, Dr Charles St-Arnaud, Dr Hector Quiroz (Co-Investigator); Virginie Bolduc, Elaine Carbonneau, Joannie Marchand, Marie-Hélène Masse (Research Coordinators); Sylvie Cloutier, Marianne Guay, Line Morin, Jessie Nicolson, Isabelle Paquette, Patricia Roy, France Théberge (Pharmacy).

**McGill University Health Centre (Royal Victoria Hospital, Glen Site), Montréal, QC**

Dr Arnold S. Kristof (Lead), Dr Peter Goldberg, Dr Roupén Hatzakorzian, Dr Sheldon Magder, Dr Jason Shahin, Dr Salman Qureshi (Co-Investigators); Josie Campisi (Research Coordinator); Vasilica Botan, Anissa Capilnean, Alyssa Corey, Annick Gagné, Jasmine Mian, Kathleen Normandin (Pharmacy).

**McGill University Health Centre (Montréal General Hospital), Montréal, QC**

Dr Kosar Khwaja (Lead), Dr Dan Deckelbaum, Dr Jeremy Grushka, Dr Ash Gursahaney, Dr David Hornstein, Dr Dev Jayaraman, Dr Tarek Razek, Dr Robert Salasidis, Dr Patrizia Zanelli (Co-Investigators); Norine Alam, Laura Garcia (Research Coordinators); Tonia Doerksen, Ariane Lessard, Gilbert Matte, Marie-France Robert (Pharmacy).

**Centre hospitalier de l'Université de Montréal, Montréal, QC**

1  
2  
3 Dr Martin Girard (Lead); Dr Pierre Aslanian, Dr Sylvain Belisle, Dr François-Martin Carrier, Dr  
4 Michaël Chassé, Dr André Denault, Dr Jean-Gilles Guimond, Dr Antoine Halwagi, Dr Paul  
5 Hébert, Dr Christopher Kolan, Dr Jordi Mancebo, Dr Nicholas Robillard (Site Co-Investigator);  
6 Fatna Benettaib, Dounia Boumahni, Casey Bourdeau Caporuscio, Marie-Ève Cantin, Virginy  
7 Côté-Gravel, Ali Ghamraoui, Martine Lebrasseur, Lancelot Legendre Courville, Stéphanie Lorio,  
8 Maria Trinidad Madrid, Nicole Poitras, Romain Rigal, Maya Salame, Valérie Tran (Research  
9 Coordinators); Katie Bacon, Nathalie Boudreau, Cecilia Carvajal, Lyne Gauthier, Julie Gendron,  
10 Karine Jean, Louise Laforest, Antonietta Lembo, Sothun Lim, Jennifer Morrissette, France  
11 Pagé, Lucie Pelletier, Marie-Christine Rodrigue (Pharmacy).  
12

### 13 **Royal Alexandra, Edmonton, AB**

14 Dr Jim Kutsiogiannis (Lead), Dr Raiyan Chowdhury, Dr Jon Davidow, Dr Curt Johnston, Dr  
15 Richard Johnston, Dr Kim Macala, Dr Sam Marcushamer, Dr Darren Markland, Dr Doug  
16 Matheson, Dr Damian Paton-Gay, Dr David Zygun (Co-Investigators); Nadine Grant, Tayne  
17 Hewer, Pat Thompson (Research Coordinators); Maggie Ge, Janny Hall, Sharon Matenchuk  
18 (Pharmacy).  
19  
20

### 21 **Nova Scotia Health Authority QEII, Halifax, NS**

22 Dr Osama Loubani (Lead), Dr Rick Hall, Dr Robert Green (Co-Investigators); Diana Gillis, Lisa  
23 Julien, Laura Lee Magennis, Tamara Mitterer (Research Coordinators); Joanna Arsenault, Kim  
24 Bruce-Payne, Patti Gallant (Pharmacy).  
25

### 26 **Kingston General, Kingston, ON**

27 Dr John Muscedere (Lead), Dr Gord Boyd, Dr Christine D'Arsigny, Dr John Drover, Dr Jason  
28 Erb, Dr David Maslove, Dr Chris Parker, Dr Stephanie Sibley (Co-Investigators); Tracy Boyd,  
29 Ilinca Georgescu, Miranda Hunt, Danielle Muscedere (Research Coordinators); Cathy Baker,  
30 Jennifer Engel, Jennifer Fleming, Lisa Roderick, Shelley Silk, Marcy Spencer, Michelle Tryon  
31 (Pharmacy).  
32  
33

### 34 **St Boniface Hospital and Health Science Centre, Winnipeg, MB**

35 Dr Ryan Zarychanski (Lead), Dr Marcus Blouw, Dr Kendiss Olafson, Dr Bojan Paunovic, Dr  
36 Heather Smith (Co-Investigators); Oliver Gutieror; Justin Lys, Nicole Marten, Sherri Lynn  
37 Wingfield (Research Coordinators); Marnie Boyle, Halyna Ferens, Debbie Hradi, Beata Kozak,  
38 Chantal MacDonald, Julie Muise (Pharmacy).  
39

### 40 **London Health Sciences Centre- Victoria Hospital, London, ON**

41 Dr Ian Ball (Lead); Eileen Campbell, Susie Imerovski, Athena Ovsenek, Rebecca Rondinelli  
42 (Research Coordinators); Teresa Longfield, Amy Moyer, Faith Norris, Janice Sumpton, Karina  
43 Teterycz (Pharmacy).  
44

### 45 **Brantford General Hospital, Brantford, ON**

46 Dr Brenda Reeve (Lead); Karen Bento, Megan Davis, Will Dechert, Krista Gallo, Barbara Longo,  
47 Courtney Mullen, Elysia Skrzypek, Laurenne Wierenga (Research Coordinators); Wesam  
48 Abuzaiter, Lynda Amorim, Rosemarie Bauer, Rachel Damota, Thoa Ho, Nicole Macdougall,  
49 Mary Thornewell, Lara Pe, Jennifer Visocchi (Pharmacy).  
50

### 51 **Health Sciences Centre, Winnipeg, MB**

52 Dr Ryan Zarychanski (Lead), Dr Bojan Paunovic (Co-Investigator); Justin Lys, Nicole Marten  
53 (Research Coordinators); Audrey Bhairo, Halyna Ferens, Beata Kozak, Debra Kubin, Dawn-  
54 Lee McLaughlin, Maria Valente (Pharmacy).  
55  
56  
57  
58  
59

**St Joseph's Hospital, Toronto, ON**

Dr Rob Cirone (Lead), Dr Jennie Johnstone (Co-Investigator); Kanthi Kavikondala, Axelle Pellerin, Laura Tomat (Research Coordinators); Jeff Carter, Jiten Jani, Brendan Yeats (Pharmacy).

**Royal Columbia Hospital, New Westminster, BC**

Dr Steve Reynolds (Lead); Suzette Willems (Research Coordinator); Tina Sekhon (Pharmacy).

**William Osler Hospital, McKenzie Health, Brampton Civic Hospital Brampton, ON**

Dr Sebastien Trop (Lead), Dr Alexandra Binnie, Dr Ronald Heslegrave, (Co-Investigator); Kim Sharman, Zaynab Panchbhaya (Research Coordinators); Rakhi Goel, Kim Kozluk, Julianne Labelle, Hina Marsonia, Cecillia Scott (Pharmacy).

**London Health Sciences Centre –University Hospital, London, ON**

Dr Dave Nagpal (Lead), Dr Ian Ball (Co-Investigator); Tracey Bentall, Jessica Sturt-Smith (Research Coordinators); Michelle Alexander, Tammy Ellis, Mindy Muylaert, Cindy Paczkowski (Pharmacy).

**University of Alberta, Edmonton, AB**

Dr Wendy Sligl (Lead), Dr Sean Bagshaw (Co-Investigator); Nadia Baig, Lorena McCoshen (Research Coordinators); Katrina Alexandropoulos, Sherri Bain, Michelle Brandt, Cathy Constable, Kari Douglas, Shaleen Maharaj, Sabrina Travers (Pharmacy).

**Foothills Hospital, University of Calgary, Calgary, AB**

Dr Tom Stelfox (Lead), Dr Philippe Couillard, Dr. Christopher Doig, Dr Ken Parhar (Co-Investigators); Joshua Booth, Cassidy Codan, Stacy Ruddell (Research Coordinators); Candice Cameron, Rhonda Edison, Anne Martin, Breanna Mina (Pharmacy).

**Peter Lougheed, University of Calgary, Calgary, AB**

Dr Dan Niven (Lead), Dr Luc Berthiaume, Dr Jonathan Gaudet (Co-Investigators); Joshua Booth, Cassidy Codan, Gina Fleming, Katie Ross, Stacy Ruddell (Research Coordinators); Candice Cameron, Rhonda Edison, Anne Martin, Breanna Mina (Pharmacy).

**Niagara Health, St Catharines, ON**

Dr Jennifer Ly Tsang (Lead), Dr Erick Duan (Co-Investigator); Mercedes Carmargo, Beverly Hoekstra (Research Coordinators); Rita Caporuscio, Rachel Kressner Falvo, Dimitra Fleming, Carmelina Maxwell, Karmen Plantic (Pharmacy).

**Centre intégré universitaire de santé et de services sociaux de l'Est-de-l'Île-de-Montréal (Hôpital Maisonneuve-Rosemont), Montréal, QC**

Dr François Marquis (Lead) Dr Han Tin Wang, Dr Francis Toupin, Dr Stephane Ahern, Dr Brian Laufer, Dr Marc Brosseau (Co-Investigators); Pauline Dul, Johanne Harvey, Lotthida Inthanavong, Danae Tassy (Research Coordinators); Helen Assayag, Maude Bachand, Marysa Betournay, Karine Daoust, Kristine Goyette, Ariane Lessard, Marceline Quach (Pharmacy).

**Grand River Hospital, Kitchener, ON**

Dr Paul Hosek (Lead), Dr Bill Plaxton (Co-Investigator); Catherine Armstrong, Rhonda Barber, William Dechert, Janelle Ellis, Kayla Fisk, Melissa Gabnouri, Emilie Gordon, Rebecca Haegens, Lisa Halford, Brooklynn Hillis, Rebecca Jesso, Jenn McLaren, Elliot McMillan, Mariska Pelkmans, Matthew Rekman, Sylvia Sinkovitis, Monica Truong, Michelle White (Research



1  
2  
3 Coordinators); Noah Bates, Susan Bryden-Cromwell, Lisa Cha, Colleen Cameron, Aminah  
4 Deen, Sheri DiGiovanni, Anders Foss, Esther Lee, Heidi MacGregor, Esther Galbraith Robyn  
5 McArthur, Julie McGregor, Keith Miller, Sharon Morris, Shelley Parker, Candice Smith, Joanna  
6 Stoglow, Jennifer Tung, Melissa Vos (Pharmacy).  
7

### 8 **Sunnybrook Health Sciences Centre, Toronto, ON**

9 Dr Neill Adhikari (Lead), Dr Andre Amaral, Dr Andre Carlos, Dr Brian Cuthbertson, Dr Rob  
10 Fowler, Dr Damon Scales (Co-Investigators);  
11 Navjot Kaur, Nicole Marinoff, Adic Perez, Jane Wang (Research Coordinators); Katrina  
12 Hatzifilalithis, John Iazzetta, Chrys Kolos, Ingrid Quinton (Pharmacy).  
13

### 14 **Joseph Brant Hospital, Burlington, ON**

15 Dr Paul Lysecki (Lead), Dr Joseph Berlingieri, Dr Sameer Shaikh, Dr Steven Skitch (Co-  
16 Investigators); Tracy Campbell (Research Coordinator); Hala Basheer, Kathy Bruder, Jane  
17 Cheng, Kaiser Qureshi, Celeste Thibault (Pharmacy).  
18

### 19 **Institut Universitaire de Cardiologie et de Pneumologie de Québec, Québec, QC**

20 Dr François Lellouche (Lead), Dr Ying Tung Sia, Dr Mathieu Simon (Co-Investigators); Pierre-  
21 Alexandre Bouchard, Patricia Lizotte (Research Coordinators); Nathalie Chateauvert, Thérèse  
22 Grenier (Pharmacy).  
23

### 24 **Centre intégré de santé et de services sociaux de Chaudière-Appalaches (L'Hôtel-Dieu de 25 Lévis), Lévis, QC**

26 Dr Patrick Archambault (Lead), Dr Jean-François Bellemare, Dr Simon Bordeleau, Dr Christine  
27 Drouin, Dr Benoît Duhaime, Dr Ann Laberge, Dr Philippe Lachance (Co-Investigators); Mélanie  
28 Constantin, Estel Deblois, Maude Dionne, Lise Lavoie, Isabelle Michel, Alexandre Pépin,  
29 Sandrine Poulin (Research Coordinators); Sarah Ancil, Amélie Chouinard, Louis-Étienne  
30 Marchand, Robin Roy (Pharmacy).  
31

### 32 **USA**

#### 33 **Mayo Clinic, Rochester, MN**

34 Dr Rodrigo Cartin-Ceba (Lead), Dr Richard Oeckler (Co-Investigator); Brenda Anderson,  
35 Lavonne Liedl, Laurie Meade, Sueanne Weist (Research Coordinators); Anna Bartoo, Debbie  
36 Bauer, Vince Brickley, Shaun Bridges, Greg Brunn, Jennifer Eickstaedt, Jill Randolph, Sandy  
37 Showalter, Erin Stern, Melissa Wendling (Pharmacy).  
38

#### 39 **St John's Mercy Medical Center, St Louis, MO**

40 Dr Robert Taylor (Lead); Margaret Cytron, Kim Fowler, Katie Krause, Jackie O'Brien, Marianne  
41 Tow (Research Coordinators); John Ma, Kaitlin Stassi (Pharmacy).  
42

### 43 **Saudi Arabia**

#### 44 **King Abdulaziz Medical Center, Riyadh, Saudi Arabia**

45 Dr Yaseen Arabi (Lead), Dr Abdulaziz Al-Dawood, Dr Haytham Tlayjeh, Dr Alaaeldien  
46 Ghanem, Dr Ahmad Hassanien, Dr. Mohamed Hegazy, Dr. Ashraf El Sharkawi (Co-  
47 Investigators); Felwa Bin Humaid, Hala Alanizi, Nadyah Alanizy, Njoud Al Bogami, (Research  
48 Coordinators); Dr Mohammed Muhaidib, Dr Jawaher Gramish, Randa Alsomali, Nora Devera,  
49 Marjane Villafranca (Pharmacy).  
50

### 51 **Abbreviations**

---

1  
 2  
 3 AAD = antibiotic-associated diarrhea;  
 4 BCA = bias corrected and accelerated;  
 5 CEA = Cost-effectiveness analysis;  
 6 CDAD = *Clostridioides* Difficile associated diarrhea;  
 7 CHEERS = Consolidated Health Economic Evaluation Reporting Standards  
 8 CI = confidence interval;  
 9 CIHR = Canadian Institute of Health Research;  
 10 CFU = colony-forming unit;  
 11 CT = computed tomography;  
 12 DOT = days of therapy;  
 13 DDD = defined daily dose;  
 14 ECMO = extracorporeal membrane oxygenation;  
 15 GBP = Great Britain Pound;  
 16 ICER = incremental cost-efficacy/effectiveness ratio;  
 17 ICU = intensive care unit;  
 18 OR = odds ratio;  
 19 QALY = quality-adjusted life-year  
 20 PCR = polymerase chain reaction;  
 21 PPP: purchase power parity  
 22 PROSPECT =Probiotics: Prevention of Severe Pneumonia and Endotracheal Colonization Trial;  
 23 RCT = randomized control trial;  
 24 SAE = serious adverse events;  
 25 SAS = Statistical analysis software;  
 26 US = United States;  
 27 V-A = veno-arterial;  
 28 V-V = veno-venous;  
 29 VAC = vacuum-assisted closure;  
 30 VAP = ventilator-associated pneumonia;  
 31 WHO = World Health Organization;  
 32  
 33

#### Footnotes

##### **Conflicts of interests**

The authors declare that they have no competing interests.

##### **Authors contributions**

Conception and design: VL, DJC, BR, FX, JJ, RF.

Manuscript writing: VL, DJC, BR, FX, JJ, RF.

Critical revision and final approval of the manuscript: VL, DJC, BR, FX, JJ, RF, JB, FL, JM, LT, DHA.

Obtained funding: DJC, JJ, FL, JM, LT.

Administrative, technical or material support: FX, BR, DJC, JJ, DHA, LT.

Study supervision: VL, DJC, BR, FX, JJ, RF.

All authors read and approved the final manuscript.

##### Go to:

##### Contributor Information

Vincent Lau, Email: [vinceissaclau@gmail.com](mailto:vinceissaclau@gmail.com)

Deborah Cook, Email: [debcook@mcmaster.ca](mailto:debcook@mcmaster.ca)

Bram Rochweg, Email: [rochweg@mcmaster.ca](mailto:rochweg@mcmaster.ca)

Feng Xie, Email: [fengxie@mcmaster.ca](mailto:fengxie@mcmaster.ca)

Jennie Johnstone, Email: [jennie.johnstone@oahpp.ca](mailto:jennie.johnstone@oahpp.ca)

Robert Fowler, Email: [Rob.Fowler@sunnybrook.ca](mailto:Rob.Fowler@sunnybrook.ca)

1  
2  
3  
4  
5  
6  
7  
8  
9  
10  
11  
12  
13  
14  
15  
16  
17  
18  
19  
20  
21  
22  
23  
24  
25  
26  
27  
28  
29  
30  
31  
32  
33  
34  
35  
36  
37  
38  
39  
40  
41  
42  
43  
44  
45  
46  
47  
48  
49  
50  
51  
52  
53  
54  
55  
56  
57  
58  
59  
60

John C. Marshall, Email: [John.Marshall@unityhealth.to](mailto:John.Marshall@unityhealth.to)  
François Lauzier, Email: [Francois.Lauzier@fmed.ulaval.ca](mailto:Francois.Lauzier@fmed.ulaval.ca)  
John Basmaji, Email: [jbasmaji2013@gmail.com](mailto:jbasmaji2013@gmail.com)  
Diane Heels-Ansdell, Email: [ansdell@mcmaster.ca](mailto:ansdell@mcmaster.ca)  
Lehana Thabane, Email: [ThabanL@mcmaster.ca](mailto:ThabanL@mcmaster.ca)

For peer review only

## References:

- 1 Muscedere JG, Martin CM, Heyland DK. The impact of ventilator-associated pneumonia on the Canadian health care system. *J Crit Care* 2008;**23**:5–10. doi:10.1016/j.jcrc.2007.11.012
- 2 Safdar N, Dezfulian C, Collard HR, *et al*. Clinical and economic consequences of ventilator-associated pneumonia: a systematic review. *Crit Care Med* 2005;**33**:2184–93.
- 3 Muscedere J, Sinuff T, Heyland DK, *et al*. The clinical impact and preventability of ventilator-associated conditions in critically ill patients who are mechanically ventilated. *Chest* 2013;**144**:1453–60. doi:10.1378/chest.13-0853
- 4 Muscedere J, Dodek P, Keenan S, *et al*. Comprehensive evidence-based clinical practice guidelines for ventilator-associated pneumonia: prevention. *J Crit Care* 2008;**23**:126–37. doi:10.1016/j.jcrc.2007.11.014
- 5 Food and Agriculture Organization, of the United Nations & World Health Organization. Joint FAO/WHO Working Group Report on Drafting Guidelines for the Evaluation of Probiotics in Food. 2002. [https://www.who.int/foodsafety/fs\\_management/en/probiotic\\_guidelines.pdf](https://www.who.int/foodsafety/fs_management/en/probiotic_guidelines.pdf) (accessed 23 Nov 2019).
- 6 WHO | Diarrhoea. WHO. <http://www.who.int/topics/diarrhoea/en/> (accessed 17 Mar 2019).
- 7 Marshall JC. Gastrointestinal flora and its alterations in critical illness. *Curr Opin Clin Nutr Metab Care* 1999;**2**:405–11.
- 8 Stappenbeck TS, Hooper LV, Gordon JI. Developmental regulation of intestinal angiogenesis by indigenous microbes via Paneth cells. *Proc Natl Acad Sci U S A* 2002;**99**:15451–5. doi:10.1073/pnas.202604299
- 9 Tanoue T, Honda K. Induction of Treg cells in the mouse colonic mucosa: a central mechanism to maintain host-microbiota homeostasis. *Semin Immunol* 2012;**24**:50–7. doi:10.1016/j.smim.2011.11.009
- 10 Brenchley JM, Douek DC. Microbial translocation across the GI tract. *Annu Rev Immunol* 2012;**30**:149–73. doi:10.1146/annurev-immunol-020711-075001
- 11 Hao Q, Lu Z, Dong BR, *et al*. Probiotics for preventing acute upper respiratory tract infections. *Cochrane Database Syst Rev* 2011;:CD006895. doi:10.1002/14651858.CD006895.pub2
- 12 Hempel S, Newberry SJ, Maher AR, *et al*. Probiotics for the prevention and treatment of antibiotic-associated diarrhea: a systematic review and meta-analysis. *JAMA* 2012;**307**:1959–69. doi:10.1001/jama.2012.3507
- 13 Ritchie ML, Romanuk TN. A meta-analysis of probiotic efficacy for gastrointestinal diseases. *PloS One* 2012;**7**:e34938. doi:10.1371/journal.pone.0034938
- 14 Johnson S, Maziade P-J, McFarland LV, *et al*. Is primary prevention of Clostridium difficile infection possible with specific probiotics? *Int J Infect Dis IJID Off Publ Int Soc Infect Dis* 2012;**16**:e786-792. doi:10.1016/j.ijid.2012.06.005

- 1  
2  
3 15 Manzanares W, Lemieux M, Langlois PL, *et al*. Probiotic and synbiotic therapy in critical  
4 illness: a systematic review and meta-analysis. *Crit Care Lond Engl* 2016;**19**:262.  
5 doi:10.1186/s13054-016-1434-y  
6
- 7 16 Goldenberg JZ, Yap C, Lytvyn L, *et al*. Probiotics for the prevention of Clostridium difficile-  
8 associated diarrhea in adults and children. *Cochrane Database Syst Rev*  
9 2017;**12**:CD006095. doi:10.1002/14651858.CD006095.pub4  
10
- 11 17 Lau VI, Rochweg B, Xie F, *et al*. Probiotics in hospitalized adult patients: a systematic  
12 review of economic evaluations. *Can J Anesth Can Anesth* Published Online First: 12  
13 November 2019. doi:10.1007/s12630-019-01525-2  
14
- 15 18 Cook DJ, Johnstone J, Marshall JC, *et al*. Probiotics: Prevention of Severe Pneumonia and  
16 Endotracheal Colonization Trial-PROSPECT: a pilot trial. *Trials* 2016;**17**:377.  
17 doi:10.1186/s13063-016-1495-x  
18
- 19 19 Johnstone J, Meade M, Marshall J, *et al*. Probiotics: Prevention of Severe Pneumonia and  
20 Endotracheal Colonization Trial-PROSPECT: protocol for a feasibility randomized pilot trial.  
21 *Pilot Feasibility Stud* 2015;**1**:19. doi:10.1186/s40814-015-0013-3  
22
- 23 20 Johnstone J, Heels-Ansdell D, Thabane L, *et al*. Evaluating probiotics for the prevention of  
24 ventilator-associated pneumonia: a randomised placebo-controlled multicentre trial protocol  
25 and statistical analysis plan for PROSPECT. *BMJ Open* 2019;**9**:e025228.  
26 doi:10.1136/bmjopen-2018-025228  
27
- 28 21 Drummond MF, Sculpher MJ, Claxton K, *et al*. *Methods for the Economic Evaluation of*  
29 *Health Care Programmes*. Oxford University Press 2015.  
30
- 31 22 Sanders GD, Neumann PJ, Basu A, *et al*. Recommendations for Conduct, Methodological  
32 Practices, and Reporting of Cost-effectiveness Analyses: Second Panel on Cost-  
33 Effectiveness in Health and Medicine. *JAMA* 2016;**316**:1093–103.  
34 doi:10.1001/jama.2016.12195  
35
- 36 23 Husereau D, Drummond M, Petrou S, *et al*. Consolidated Health Economic Evaluation  
37 Reporting Standards (CHEERS) statement. *BMJ* 2013;**346**:f1049. doi:10.1136/bmj.f1049  
38
- 39 24 Polk RE, Fox C, Mahoney A, *et al*. Measurement of adult antibacterial drug use in 130 US  
40 hospitals: comparison of defined daily dose and days of therapy. *Clin Infect Dis Off Publ*  
41 *Infect Dis Soc Am* 2007;**44**:664–70. doi:10.1086/511640  
42
- 43 25 Kuster SP, Ruef C, Ledergerber B, *et al*. Quantitative antibiotic use in hospitals: comparison  
44 of measurements, literature review, and recommendations for a standard of reporting.  
45 *Infection* 2008;**36**:549–59. doi:10.1007/s15010-008-7462-z  
46
- 47 26 Little RJA, Rubin DB. *Statistical Analysis with Missing Data*. New York, NY, USA: : John  
48 Wiley & Sons, Inc. 1986.  
49
- 50 27 Zhang Y, Alyass A, Vanniyasingam T, *et al*. A systematic survey of the methods literature  
51 on the reporting quality and optimal methods of handling participants with missing outcome  
52 data for continuous outcomes in randomized controlled trials. *J Clin Epidemiol* 2017;**88**:67–  
53 80. doi:10.1016/j.jclinepi.2017.05.016  
54  
55  
56  
57  
58  
59  
60

- 1  
2  
3 28 Fowler RA, Mittmann N, Geerts WH, *et al*. Economic evaluation of the prophylaxis for  
4 thromboembolism in critical care trial (E-PROTECT): study protocol for a randomized  
5 controlled trial. *Trials* 2014;**15**:502. doi:10.1186/1745-6215-15-502  
6  
7 29 Bank of Canada Inflation Calculator. [https://www.bankofcanada.ca/rates/related/inflation-](https://www.bankofcanada.ca/rates/related/inflation-calculator/)  
8 [calculator/](https://www.bankofcanada.ca/rates/related/inflation-calculator/) (accessed 12 Apr 2019).  
9  
10 30 Official exchange rate (LCU per US\$, period average) | Data.  
11 <https://data.worldbank.org/indicator/PA.NUS.FCRF> (accessed 11 Feb 2019).  
12  
13 31 Currency Converter | Foreign Exchange Rates | OANDA.  
14 <https://www.oanda.com/currency/converter/> (accessed 23 Mar 2019).  
15  
16 32 Tukiainen M. RatesFX - Daily foreign exchange rates, information about currencies and  
17 currency markets. Published Online First: 11 February 2019. <https://www.ratesfx.com/>  
18 (accessed 11 Feb 2019).  
19  
20 33 Ng R, Hasan B, Mittmann N, *et al*. Economic analysis of NCIC CTG JBR.10: a randomized  
21 trial of adjuvant vinorelbine plus cisplatin compared with observation in early stage non-  
22 small-cell lung cancer--a report of the Working Group on Economic Analysis, and the Lung  
23 Disease Site Group, National Cancer Institute of Canada Clinical Trials Group. *J Clin Oncol*  
24 *Off J Am Soc Clin Oncol* 2007;**25**:2256–61. doi:10.1200/JCO.2006.09.4342  
25  
26 34 Patel PJ, Singh SK, Panaich S, *et al*. The aging gut and the role of prebiotics, probiotics,  
27 and synbiotics: A review. *J Clin Gerontol Geriatr* 2014;**5**:3–6. doi:10.1016/j.jcgg.2013.08.003  
28  
29 35 Wachholz PA, Boas PJFV, dos Santos Nunes V, *et al*. Evidence on the role of prebiotics,  
30 probiotics, and synbiotics in gut health and disease prevention in the elderly. *J Clin Gerontol*  
31 *Geriatr*;5:1–2.  
32  
33 36 Bagshaw SM, Stelfox HT, McDermid RC, *et al*. Association between frailty and short- and  
34 long-term outcomes among critically ill patients: a multicentre prospective cohort study.  
35 *CMAJ* 2014;**186**:E95–102. doi:10.1503/cmaj.130639  
36  
37 37 Fieller EC. Some Problems in Interval Estimation. *J R Stat Soc Ser B Methodol*  
38 1954;**16**:175–85.  
39  
40 38 Doubilet P, Begg CB, Weinstein MC, *et al*. Probabilistic sensitivity analysis using Monte  
41 Carlo simulation. A practical approach. *Med Decis Mak Int J Soc Med Decis Mak*  
42 1985;**5**:157–77. doi:10.1177/0272989X8500500205  
43  
44 39 Wilcox ME, Vaughan K, Chong CAKY, *et al*. Cost-Effectiveness Studies in the ICU: A  
45 Systematic Review. *Crit Care Med* 2019;**Online First**.  
46 doi:10.1097/CCM.00000000000003768  
47  
48 40 Fowler RA, Mittmann N, Geerts W, *et al*. Cost-effectiveness of Dalteparin vs Unfractionated  
49 Heparin for the Prevention of Venous Thromboembolism in Critically Ill Patients. *JAMA*  
50 2014;**312**:2135–45. doi:10.1001/jama.2014.15101  
51  
52  
53  
54  
55  
56  
57  
58  
59  
60

- 1  
2  
3 41 Lenoir-Wijnkoop I, Nuijten MJC, Craig J, *et al.* Nutrition economic evaluation of a probiotic in  
4 the prevention of antibiotic-associated diarrhea. *Front Pharmacol* 2014;**5**:13.  
5 doi:10.3389/fphar.2014.00013  
6  
7 42 Vermeersch SJ, Vandenplas Y, Tanghe A, *et al.* Economic evaluation of *S. boulardii* CNCM  
8 I-745 for prevention of antibiotic-associated diarrhoea in hospitalized patients. *Acta Gastro-*  
9 *Enterol Belg* 2018;**81**:269–76.  
10  
11 43 Kerlin MP, Cooke CR. Understanding Costs When Seeking Value in Critical Care. *Ann Am*  
12 *Thorac Soc* 2015;**12**:1743–4. doi:10.1513/AnnalsATS.201510-660ED  
13  
14 44 Krahn M, Bryan S, Lee K, *et al.* Embracing the science of value in health. *CMAJ*  
15 2019;**191**:E733–6. doi:10.1503/cmaj.181606  
16  
17 45 Vijayaraghavan BKT, Willaert X, Cuthbertson BH. Cost-effectiveness analysis should be  
18 mandatory in clinical-effectiveness research. *CMAJ* 2019;**191**:E1140–E1140.  
19 doi:10.1503/cmaj.73298  
20  
21 46 Heyland D, Muscedere J, Wischmeyer PE, *et al.* A Randomized Trial of Glutamine and  
22 Antioxidants in Critically Ill Patients. *N Engl J Med* 2013;**368**:1489–97.  
23 doi:10.1056/NEJMoa1212722  
24  
25 47 Calandra T, Cohen J, International Sepsis Forum Definition of Infection in the ICU  
26 Consensus Conference. The international sepsis forum consensus conference on  
27 definitions of infection in the intensive care unit. *Crit Care Med* 2005;**33**:1538–48.  
28  
29 48 Pugin J, Auckenthaler R, Mili N, *et al.* Diagnosis of ventilator-associated pneumonia by  
30 bacteriologic analysis of bronchoscopic and nonbronchoscopic “blind” bronchoalveolar  
31 lavage fluid. *Am Rev Respir Dis* 1991;**143**:1121–9. doi:10.1164/ajrccm/143.5\_Pt\_1.1121  
32  
33 49 Horan TC, Andrus M, Dudeck MA. CDC/NHSN surveillance definition of health care-  
34 associated infection and criteria for specific types of infections in the acute care setting. *Am*  
35 *J Infect Control* 2008;**36**:309–32. doi:10.1016/j.ajic.2008.03.002  
36  
37 50 Chastre J, Fagon J-Y. Ventilator-associated Pneumonia. *Am J Respir Crit Care Med*  
38 2002;**165**:867–903. doi:10.1164/ajrccm.165.7.2105078  
39  
40 51 Chastre J, Wolff M, Fagon JY, *et al.* Comparison of 8 vs 15 Days of Antibiotic Therapy for  
41 Ventilator-Associated Pneumonia in Adults: A Randomized Trial. | Critical Care Medicine |  
42 JAMA | JAMA Network. *JAMA* 2003;**290**:2588–98. doi:10.1001/jama.290.19.2588  
43  
44 52 Lewis SJ, Heaton KW. Stool form scale as a useful guide to intestinal transit time. *Scand J*  
45 *Gastroenterol* 1997;**32**:920–4. doi:10.3109/00365529709011203  
46  
47 53 Cohen SH, Gerding DN, Johnson S, *et al.* Clinical practice guidelines for *Clostridium difficile*  
48 infection in adults: 2010 update by the society for healthcare epidemiology of America  
49 (SHEA) and the infectious diseases society of America (IDSA). *Infect Control Hosp*  
50 *Epidemiol* 2010;**31**:431–55. doi:10.1086/651706  
51  
52 54 Thibault R, Graf S, Clerc A, *et al.* Diarrhoea in the ICU: respective contribution of feeding  
53 and antibiotics. *Crit Care* 2013;**17**:R153. doi:10.1186/cc12832  
54  
55  
56  
57  
58  
59  
60

1  
2  
3 55 Cook D, Lauzier F, Rocha MG, *et al*. Serious adverse events in academic critical care  
4 research. *CMAJ Can Med Assoc J* 2008;**178**:1181–4. doi:10.1503/cmaj.071366  
5  
6  
7  
8  
9  
10  
11  
12  
13  
14  
15  
16  
17  
18  
19  
20  
21  
22  
23  
24  
25  
26  
27  
28  
29  
30  
31  
32  
33  
34  
35  
36  
37  
38  
39  
40  
41  
42  
43  
44  
45  
46  
47  
48  
49  
50  
51  
52  
53  
54  
55  
56  
57  
58  
59  
60

For peer review only



## Tables

Table 1: Summary of economic evaluation framework

|                               |                                                                                                                                                                                                                                                                                                   |
|-------------------------------|---------------------------------------------------------------------------------------------------------------------------------------------------------------------------------------------------------------------------------------------------------------------------------------------------|
| <b>Question:</b>              | Is the use of probiotics as compared to standard care without probiotics cost-effective for the prevention of VAP and other clinically important outcomes in critically ill medical-surgical patients in PROSPECT?                                                                                |
| <b>Perspective:</b>           | Public payer (in-hospital costs)                                                                                                                                                                                                                                                                  |
| <b>Setting:</b>               | Ventilated ICU patients (44 centers, 3 countries: 41 Canada, 2 USA, 1 Saudi Arabia)                                                                                                                                                                                                               |
| <b>Comparators:</b>           | Probiotics ( <i>Lactobacillus rhamnosus</i> GG) with standard of care versus standard care without probiotics                                                                                                                                                                                     |
| <b>Time Horizon:</b>          | From ICU participant admission to hospital discharge/death (non-fixed time span)                                                                                                                                                                                                                  |
| <b>Discount Rate:</b>         | No discounting (no long term follow-up over 1 year)                                                                                                                                                                                                                                               |
| <b>Clinical Outcomes:</b>     | VAP, CDAD, AAD, length of stay and mortality (ICU and hospital)                                                                                                                                                                                                                                   |
| <b>Costs:</b>                 | Direct medical costs associated with treatment and complications (ICU and ward costs, personnel, medications, laboratory tests, diagnostic testing and procedures/surgeries)                                                                                                                      |
| <b>Evaluation:</b>            | Primary outcome: Incremental cost-efficacy ratios (ICERs) per in-hospital VAP event avoided<br>Secondary outcomes: ICERs for other clinically important outcomes:<br>(i.) Incremental cost per CDAD avoided<br>(ii.) Incremental cost per AAD avoided<br>(iv.) Incremental cost per death avoided |
| <b>Currency (price date):</b> | United States Dollars (2019)                                                                                                                                                                                                                                                                      |
| <b>Uncertainty:</b>           | Non-parametric bootstrapping to produce confidence intervals (probabilistic sensitivity analysis)<br>Cost sampling from various hospitals (stratified by: location)<br>Sensitivity analyses to deal with structural and methodological uncertainty                                                |

AAD = antibiotic associated diarrhea; CDAD = *Clostridioides difficile* associated diarrhea; ICER = incremental cost-efficacy/effectiveness ratio; ICU = intensive care unit; PROSPECT = Probiotics: Prevention of Severe Pneumonia and Endotracheal Colonization Trial; US = United States; VAP = ventilator-associated pneumonia;

1  
2  
3 Supplemental Table 1: Definitions of clinical outcomes  
4

5 Supplemental Table 2: Healthcare resource utilization and unit costs  
6

7 Supplemental Table 3: Health economic evaluation assumptions  
8  
9  
10  
11  
12  
13  
14  
15  
16  
17  
18  
19  
20  
21  
22  
23  
24  
25  
26  
27  
28  
29  
30  
31  
32  
33  
34  
35  
36  
37  
38  
39  
40  
41  
42  
43  
44  
45  
46  
47  
48  
49  
50  
51  
52  
53  
54  
55  
56  
57  
58  
59  
60

For peer review only

1  
2  
3  
4  
5  
6  
7  
8  
9  
10  
11  
12  
13  
14  
15  
16  
17  
18  
19  
20  
21  
22  
23  
24  
25  
26  
27  
28  
29  
30  
31  
32  
33  
34  
35  
36  
37  
38  
39  
40  
41  
42  
43  
44  
45  
46  
47  
48  
49  
50  
51  
52  
53  
54  
55  
56  
57  
58  
59  
60

**Supplemental Appendix**

Supplemental Appendix 1: E-PROSPECT Costing Manual

---

For peer review only

1  
2  
3 BMJ Open  
4  
5

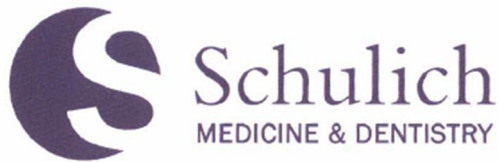

11  
12 November 26, 2019  
13

14  
15 Adrian Aldcroft  
16 Editor-in-Chief  
17 **BMJ Open Editorial Office**  
18 BMA House  
19 Tavistock Square  
20 London, WC1H 9JR, UK  
21

22 Dear Dr. Aldcroft

23 Re: Manuscript Title:

24 Economic Evaluation alongside the Probiotics to Prevent of Severe Pneumonia and  
25 Endotracheal Colonization Trial (E-PROSPECT): Study Protocol

26 Corresponding Author: Vincent Lau

27 e-mail: [vinceissaclau@gmail.com](mailto:vinceissaclau@gmail.com)  
28

29 Thank you for your consideration of acceptance of the enclosed manuscript for  
30 publication in BMJ Open.  
31

32 The objective and approach of our research is to conduct an economic evaluation using  
33 a cost-effectiveness analysis alongside the large multi-centered randomized control trial  
34 investigating Probiotics to Prevent of Severe Pneumonia and Endotracheal Colonization Trial  
35 (PROSPECT). We present the pre-specified statistical analysis protocol for that economic  
36 evaluation (E-PROSPECT).  
37  
38  
39

40 BMJ Open is an internationally leading medical journal in the area of protocol  
41 publication, and a leader in publication of health economic evaluations and their protocols.  
42 PROSPECT is the largest investigation into probiotics and its potential to prevent ventilator-  
43 associated pneumonias (VAP) and other healthcare-associated infections (*Clostridioides*  
44 *difficile*-associated diarrhea), and E-PROSPECT is the largest undertaking of economic  
45 evaluation of the probiotics into their cost-effectiveness for VAP. Special considerations for this  
46 submission are that this protocol is being published *a priori* to the results of PROSPECT being  
47 published, to reduce hypothesis-driven bias.  
48  
49  
50  
51  
52

53 Other related papers by myself and fellow authors are listed below (copies of the  
54 previous papers can be submitted upon request):  
55  
56  
57  
58  
59  
60

- 1  
2  
3 • Lau VI, Rochweg B, Xie F, *et al.* Probiotics in hospitalized adult patients: a systematic  
4 review of economic evaluations. *Can J Anesth Can Anesth* Published Online First: 12  
5 November 2019. doi:10.1007/s12630-019-01525-2  
6  
7 • Cook DJ, Johnstone J, Marshall JC, *et al.* Probiotics: Prevention of Severe Pneumonia and  
8 Endotracheal Colonization Trial-PROSPECT: a pilot trial. *Trials* 2016;**17**:377.  
9 doi:10.1186/s13063-016-1495-x  
10  
11 • Johnstone J, Meade M, Marshall J, *et al.* Probiotics: Prevention of Severe Pneumonia and  
12 Endotracheal Colonization Trial-PROSPECT: protocol for a feasibility randomized pilot trial.  
13 *Pilot Feasibility Stud* 2015;1:19. doi:10.1186/s40814-015-0013-3  
14  
15 • Johnstone J, Heels-Ansdell D, Thabane L, *et al.* Evaluating probiotics for the prevention of  
16 ventilator-associated pneumonia: a randomised placebo-controlled multicentre trial protocol  
17 and statistical analysis plan for PROSPECT. *BMJ Open* 2019;**9**:e025228.  
18 doi:10.1136/bmjopen-2018-025228  
19  
20  
21

22 This manuscript has not been submitted or published previously, either in whole or in part, and  
23 is not under consideration for publication elsewhere. We have had no reviews of this  
24 submission, or previous communication with journal staff (editors/reviewers). All authors attest  
25 to the originality of the text, and the originality of any/all supporting tables, images, and  
26 supplementary electronic materials as related to this document, except where otherwise  
27 indicated that the material has been reproduced with the appropriate permissions. We also  
28 hereby affirm that ethical approval for this work was obtained as appropriate to this work.  
29  
30

31 All authors have made material contributions to this manuscript according to the rules of  
32 authorship as explained in the Instructions for Authors. We also accept the terms of reference  
33 for manuscript submission and editorial peer review as outlined in the Instructions for Authors.  
34 We agree to the terms of any copyright transfer statements which shall be deemed in effect if  
35 and when the manuscript is accepted for publication.  
36

37 Should this manuscript be accepted, we also agree that the editors and the publisher have the  
38 right to edit the manuscript and to modify it to comply with the journal's standard punctuation,  
39 grammar and sentence structure. We will have the opportunity to review final page proofs, and  
40 to insert corrections prior to publication, with the exception of published letters.  
41

42 Thank you for your consideration of our manuscript. We look forward to further communications  
43 in the future.  
44

45 Sincerely,  
46

47  
48  
49  
50  
51  
52  
53

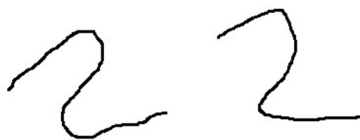

54 Dr. Vincent Lau, on behalf of the authors  
55  
56  
57  
58  
59  
60

Supplemental Table 1: Definitions of clinical outcomes

| Clinical Outcome                             | Definition                                                                                                                                                                                                                                                                                                                                                                                                                                                                                                                                                                                                                                                                                                          | Source/Rationale                                                                                                                                                                                                                                                                                                                                                                                                                                                                                                                                                                                                                                                                                            |
|----------------------------------------------|---------------------------------------------------------------------------------------------------------------------------------------------------------------------------------------------------------------------------------------------------------------------------------------------------------------------------------------------------------------------------------------------------------------------------------------------------------------------------------------------------------------------------------------------------------------------------------------------------------------------------------------------------------------------------------------------------------------------|-------------------------------------------------------------------------------------------------------------------------------------------------------------------------------------------------------------------------------------------------------------------------------------------------------------------------------------------------------------------------------------------------------------------------------------------------------------------------------------------------------------------------------------------------------------------------------------------------------------------------------------------------------------------------------------------------------------|
| <u>Ventilator-associated pneumonia (VAP)</u> | <p>The primary outcome is adjudicated VAP. Clinically suspected VAP at participating sites is being centrally adjudicated independently and in duplicate by 2 physicians blinded to allocation and center, informed by the following standardized definition: receiving invasive mechanical ventilation for &gt; 2 days, when there is a new, progressive or persistent radiographic infiltrate on chest radiograph plus any 2 of the following:</p> <ol style="list-style-type: none"> <li>1) fever (temperature &gt;38°C) or hypothermia (temperature &lt;36°C);</li> <li>2) relative leukopenia (&lt;3.0 x 10<sup>6</sup>/L) or leukocytosis (&gt;10 x 10<sup>6</sup>/L);</li> <li>3) purulent sputum</li> </ol> | <p>The American College of Chest Physicians (ACCP) definition did not provide thresholds for leukopenia or leukocytosis. Therefore, the thresholds were obtained from Morrow et al [Morrow] as their VAP definition was also based on the ACCP definition [Grossman]. Any disagreement in adjudication will be resolved through discussion and consensus. Acknowledging that there is no universally accepted gold standard VAP definition [3], and that in non-immunocompromised patients, routine invasive testing is not associated with improved outcomes [Canadian Critical Care Trials Group], we are also collecting data to allow VAP reporting according to several other definitions [46–49].</p> |
| <u>Early VAP</u>                             | Pneumonia arising on day 3, 4 or 5 after the initiation of mechanical ventilation.                                                                                                                                                                                                                                                                                                                                                                                                                                                                                                                                                                                                                                  | We are classifying VAP by early VAP and late VAP, as the etiologic organisms may differ, the antimicrobials prescribed may differ, and the prognosis is often worse for late VAP [50,51]. We will also report a composite outcome of early VAP, late VAP, and post-extubation pneumonia, adjudicated independently and in duplicate by 2 physicians. For the timing of all pneumonia outcomes, we use days rather than hours to inform the classification.                                                                                                                                                                                                                                                  |
| <u>Late VAP</u>                              | Late VAP is defined as VAP arising on day 6 of mechanical ventilation or later, and including up to 2 days after                                                                                                                                                                                                                                                                                                                                                                                                                                                                                                                                                                                                    |                                                                                                                                                                                                                                                                                                                                                                                                                                                                                                                                                                                                                                                                                                             |

|                                                            |                                                                                                                                                                                                                                                             |                                                                                                                                                                                                                                                                                                                                                                                                                                                                                                                                                                 |
|------------------------------------------------------------|-------------------------------------------------------------------------------------------------------------------------------------------------------------------------------------------------------------------------------------------------------------|-----------------------------------------------------------------------------------------------------------------------------------------------------------------------------------------------------------------------------------------------------------------------------------------------------------------------------------------------------------------------------------------------------------------------------------------------------------------------------------------------------------------------------------------------------------------|
|                                                            | discontinuation of mechanical ventilation (also relevant for patients with a tracheostomy)                                                                                                                                                                  |                                                                                                                                                                                                                                                                                                                                                                                                                                                                                                                                                                 |
| <u>Post-extubation pneumonia</u>                           | Pneumonia arising in the ICU following discontinuation of mechanical ventilation (3 or more days after discontinuation), labeled post-extubation pneumonia, to avoid suppressing potentially relevant lung infections that arise in ICU                     |                                                                                                                                                                                                                                                                                                                                                                                                                                                                                                                                                                 |
| <u>Diarrhea</u>                                            | Diarrhea in the ICU: <ul style="list-style-type: none"> <li>• World Health Organization definition (<math>\geq 3</math> loose or watery bowel movements per day)</li> <li>• Bristol Stool classification for loose or watery stool (type 6 or 7)</li> </ul> | We will record each bowel movement and define diarrhea incorporating 2 metrics [6,52]                                                                                                                                                                                                                                                                                                                                                                                                                                                                           |
| <u>Clostridioides difficile-associated diarrhea (CDAD)</u> | Clostridioides difficile in the ICU and prior to discharge from hospital: diarrhea (as previously defined) and laboratory confirmation of C. difficile or colonoscopic or histopathologic findings demonstrating pseudomembranous colitis                   | Definition from Cohen et al. [53]. Will be adjudicated independently and in duplicate by 2 physicians                                                                                                                                                                                                                                                                                                                                                                                                                                                           |
| <u>Antibiotic-associated diarrhea (AAD)</u>                | AAD: diarrhea (as above) defined as following the administration of antibiotics, any day antibiotics are administered or within 1 day after starting any antibiotic                                                                                         | Definition from Thibault et al. [54]                                                                                                                                                                                                                                                                                                                                                                                                                                                                                                                            |
| <u>Other healthcare-associated infections</u>              | Any infection acquired during the ICU stay, including bloodstream infection, intravascular catheter-related bloodstream infection, intra-abdominal infection, C. difficile infection, urinary tract infection, skin and soft tissue infection, and others.  | These individual infections are classified using definitions adapted from the International Sepsis Forum Consensus Conference on Definitions of Infection in the Intensive Care Unit [47], as adapted in prior studies [46]. We will also report a composite outcome of any infections (including pneumonia) acquired during the ICU stay. Secondary infectious outcomes (other than pneumonia and C. difficile) are being centrally adjudicated by 1 physician blinded to allocation and center, based on review of data collected at each participating site. |
| <u>Serious adverse events (SAE)</u>                        | Defined as isolation of Lactobacillus spp. in a culture from a sterile site or as the                                                                                                                                                                       | The rationale for our approach to SAEs [Guidance                                                                                                                                                                                                                                                                                                                                                                                                                                                                                                                |

|  |                                                                                                                                                                                                         |                                                                                                                                                                                                                                                                                                                                                                                                                         |
|--|---------------------------------------------------------------------------------------------------------------------------------------------------------------------------------------------------------|-------------------------------------------------------------------------------------------------------------------------------------------------------------------------------------------------------------------------------------------------------------------------------------------------------------------------------------------------------------------------------------------------------------------------|
|  | sole or predominant organism cultured from a non-sterile site and results in:<br>1) persistent or significant disability or incapacity;<br>2) that is life-threatening, or;<br>3) that results in death | Document for Industry] accords with our guidelines for academic drug trials in critical care [55]. Any culture obtained by the ICU team and processed by the clinical microbiology laboratory as positive for Lactobacillus spp. is recorded. Any such bacterial sample is sent to a McMaster University research laboratory for strain genotyping to evaluate consistency with the administered L. rhamnosus GG strain |
|--|---------------------------------------------------------------------------------------------------------------------------------------------------------------------------------------------------------|-------------------------------------------------------------------------------------------------------------------------------------------------------------------------------------------------------------------------------------------------------------------------------------------------------------------------------------------------------------------------------------------------------------------------|



Supplemental Table 2: Healthcare resource utilization and unit costs

| Cost Categories                                                                                                                                                                                                                                                                                                                                                                                                                                                                                                                                                                                                                                                                                                                                                                                                                                                                                                                                                                                                                                                                                                                                                                                                                                                                                                                                                                                                                             | Natural Units | Unit Cost | Total Cost | Source |
|---------------------------------------------------------------------------------------------------------------------------------------------------------------------------------------------------------------------------------------------------------------------------------------------------------------------------------------------------------------------------------------------------------------------------------------------------------------------------------------------------------------------------------------------------------------------------------------------------------------------------------------------------------------------------------------------------------------------------------------------------------------------------------------------------------------------------------------------------------------------------------------------------------------------------------------------------------------------------------------------------------------------------------------------------------------------------------------------------------------------------------------------------------------------------------------------------------------------------------------------------------------------------------------------------------------------------------------------------------------------------------------------------------------------------------------------|---------------|-----------|------------|--------|
| Study-related drugs <ul style="list-style-type: none"> <li>• probiotics (<i>Lactobacillus rhamnosus GG</i>)</li> <li>• antibiotics:               <ul style="list-style-type: none"> <li>○ piperacillin-tazobactam</li> <li>○ ceftriaxone</li> <li>○ ceftazidime</li> <li>○ azithromycin</li> <li>○ vancomycin</li> <li>○ metronidazole</li> <li>○ levofloxacin</li> <li>○ imipenem</li> <li>○ meropenem</li> <li>○ amoxicillin-clavulin</li> <li>○ cefuroxime</li> <li>○ linezolid</li> <li>○ cefazolin</li> <li>○ cloxacillin</li> <li>○ ciprofloxacin</li> <li>○ gentamicin</li> <li>○ trimethoprim-sulfamethoxazole</li> </ul> </li> <li>• steroids               <ul style="list-style-type: none"> <li>○ dexamethasone</li> <li>○ methylprednisone</li> <li>○ hydrocortisone</li> <li>○ prednisone</li> </ul> </li> <li>• stress ulcer prophylaxis               <ul style="list-style-type: none"> <li>○ cimetidine</li> <li>○ ranitidine</li> <li>○ famotidine</li> <li>○ nizatidine</li> <li>○ lansoprazole</li> <li>○ dexlansoprazole</li> <li>○ pantoprazole</li> <li>○ esomeprazole</li> <li>○ omeprazole</li> <li>○ rabeprazole</li> </ul> </li> <li>• laxatives/motility agents               <ul style="list-style-type: none"> <li>○ domperidone</li> <li>○ metoclopramide</li> <li>○ erythromycin</li> <li>○ senna</li> <li>○ dulcolax</li> <li>○ golytely</li> <li>○ glycerin</li> <li>○ lactulose</li> </ul> </li> </ul> |               |           |            |        |

|                                                                                                                                                                                                                                                                                                                                                                                                                                                                                                                                                                                 |  |  |  |  |
|---------------------------------------------------------------------------------------------------------------------------------------------------------------------------------------------------------------------------------------------------------------------------------------------------------------------------------------------------------------------------------------------------------------------------------------------------------------------------------------------------------------------------------------------------------------------------------|--|--|--|--|
| <ul style="list-style-type: none"> <li>○ colace</li> <li>○ citro-mag</li> <li>○ PegLyte</li> <li>○ pancreatic enzymes</li> <li>○ enema</li> <li>• opiates             <ul style="list-style-type: none"> <li>○ morphine</li> <li>○ hydromorphone</li> <li>○ demerol</li> <li>○ fentanyl</li> <li>○ oxycodone</li> <li>○ percocets</li> </ul> </li> </ul>                                                                                                                                                                                                                        |  |  |  |  |
| <p>Laboratory testing</p> <ul style="list-style-type: none"> <li>• complete blood count</li> <li>• creatinine</li> <li>• arterial blood gas</li> <li>• lactate</li> <li>• albumin</li> <li>• blood cultures</li> <li>• urine cultures</li> <li>• sputum/tracheal aspirate/bronchoalveolar lavage cultures</li> <li>• <i>C. difficile</i> polymerase chain reaction (PCR), toxin assays, ELISA, cell culture, LAMP</li> <li>• other aerobic/anaerobic cultures             <ul style="list-style-type: none"> <li>○ thoracentesis</li> <li>○ paracentesis</li> </ul> </li> </ul> |  |  |  |  |
| <p>Personnel (<i>per diem or hourly wage</i>)</p> <ul style="list-style-type: none"> <li>• most responsible physician             <ul style="list-style-type: none"> <li>○ ICU</li> <li>○ Hospital</li> </ul> </li> <li>• consultation physicians</li> <li>• nursing</li> <li>• pharmacist</li> <li>• respiratory therapist</li> <li>• physical therapist</li> <li>• social work</li> <li>• ICU administrative and/or clerical staffing</li> </ul>                                                                                                                              |  |  |  |  |
| <p>Radiology</p> <ul style="list-style-type: none"> <li>• portable chest or abdominal radiographs</li> <li>• computerized tomography (CT) scan: chest, abdomen, pelvis, sinusitis, head</li> <li>• MRI: head, chest, joint</li> </ul>                                                                                                                                                                                                                                                                                                                                           |  |  |  |  |

|    |                                                                                                                                |  |  |  |
|----|--------------------------------------------------------------------------------------------------------------------------------|--|--|--|
| 1  |                                                                                                                                |  |  |  |
| 2  |                                                                                                                                |  |  |  |
| 3  | <ul style="list-style-type: none"> <li>• abdominal ultrasound</li> </ul>                                                       |  |  |  |
| 4  | Procedural costs:                                                                                                              |  |  |  |
| 5  | <ul style="list-style-type: none"> <li>• central venous catheter,</li> </ul>                                                   |  |  |  |
| 6  | <ul style="list-style-type: none"> <li>peripherally inserted central</li> </ul>                                                |  |  |  |
| 7  | <ul style="list-style-type: none"> <li>catheter, arterial lines</li> </ul>                                                     |  |  |  |
| 8  | <ul style="list-style-type: none"> <li>• chest tube</li> </ul>                                                                 |  |  |  |
| 9  | <ul style="list-style-type: none"> <li>• naso- or oro-gastric tube</li> </ul>                                                  |  |  |  |
| 10 | <ul style="list-style-type: none"> <li>• percutaneous endoscopic</li> </ul>                                                    |  |  |  |
| 11 | <ul style="list-style-type: none"> <li>gastrostomy (PEG) tube</li> </ul>                                                       |  |  |  |
| 12 | <ul style="list-style-type: none"> <li>• tube feed</li> </ul>                                                                  |  |  |  |
| 13 | <ul style="list-style-type: none"> <li>• fiber</li> </ul>                                                                      |  |  |  |
| 14 | <ul style="list-style-type: none"> <li>• protein supplement</li> </ul>                                                         |  |  |  |
| 15 | <ul style="list-style-type: none"> <li>• ventilator circuit changes</li> </ul>                                                 |  |  |  |
| 16 | <ul style="list-style-type: none"> <li>• endotracheal tubes (with or</li> </ul>                                                |  |  |  |
| 17 | <ul style="list-style-type: none"> <li>without subglottic suction)</li> </ul>                                                  |  |  |  |
| 18 | <ul style="list-style-type: none"> <li>• invasive ventilation (ventilator</li> </ul>                                           |  |  |  |
| 19 | <ul style="list-style-type: none"> <li>days)</li> </ul>                                                                        |  |  |  |
| 20 | <ul style="list-style-type: none"> <li> <ul style="list-style-type: none"> <li>○ heat moisture exchange</li> </ul> </li> </ul> |  |  |  |
| 21 | <ul style="list-style-type: none"> <li> <ul style="list-style-type: none"> <li>○ heated humidifier</li> </ul> </li> </ul>      |  |  |  |
| 22 | <ul style="list-style-type: none"> <li>• non-invasive positive pressure</li> </ul>                                             |  |  |  |
| 23 | <ul style="list-style-type: none"> <li>ventilation</li> </ul>                                                                  |  |  |  |
| 24 | <ul style="list-style-type: none"> <li>• high-flow nasal cannula</li> </ul>                                                    |  |  |  |
| 25 | <ul style="list-style-type: none"> <li>• vasopressor/inotropic agents</li> </ul>                                               |  |  |  |
| 26 | <ul style="list-style-type: none"> <li>• VAP prevention bundles</li> </ul>                                                     |  |  |  |
| 27 | <ul style="list-style-type: none"> <li> <ul style="list-style-type: none"> <li>○ chlorhexidine usage</li> </ul> </li> </ul>    |  |  |  |
| 28 | <ul style="list-style-type: none"> <li> <ul style="list-style-type: none"> <li>○ bacterial filters</li> </ul> </li> </ul>      |  |  |  |
| 29 | <ul style="list-style-type: none"> <li> <ul style="list-style-type: none"> <li>○ oral decontamination</li> </ul> </li> </ul>   |  |  |  |
| 30 | <ul style="list-style-type: none"> <li> <ul style="list-style-type: none"> <li>○ gut decontamination</li> </ul> </li> </ul>    |  |  |  |
| 31 | <ul style="list-style-type: none"> <li> <ul style="list-style-type: none"> <li>○ oral antibiotic paste</li> </ul> </li> </ul>  |  |  |  |
| 32 | <ul style="list-style-type: none"> <li>• colonoscopy (cautery,</li> </ul>                                                      |  |  |  |
| 33 | <ul style="list-style-type: none"> <li>epinephrine injection)</li> </ul>                                                       |  |  |  |
| 34 | <ul style="list-style-type: none"> <li>• echocardiograms</li> </ul>                                                            |  |  |  |
| 35 | <ul style="list-style-type: none"> <li>(transthoracic/transesophageal)</li> </ul>                                              |  |  |  |
| 36 | <ul style="list-style-type: none"> <li>• bronchoscopy</li> </ul>                                                               |  |  |  |
| 37 | <ul style="list-style-type: none"> <li>• thoracostomy</li> </ul>                                                               |  |  |  |
| 38 | <ul style="list-style-type: none"> <li>• tracheostomy</li> </ul>                                                               |  |  |  |
| 39 | <ul style="list-style-type: none"> <li>• interventional radiology drain</li> </ul>                                             |  |  |  |
| 40 | <ul style="list-style-type: none"> <li>• intermittent hemodialysis</li> </ul>                                                  |  |  |  |
| 41 | <ul style="list-style-type: none"> <li>• continuous renal replacement</li> </ul>                                               |  |  |  |
| 42 | <ul style="list-style-type: none"> <li>therapy</li> </ul>                                                                      |  |  |  |
| 43 | <ul style="list-style-type: none"> <li>• fecal management device</li> </ul>                                                    |  |  |  |
| 44 | Operative costs                                                                                                                |  |  |  |
| 45 | <ul style="list-style-type: none"> <li>• laparotomy (toxic megacolon,</li> </ul>                                               |  |  |  |
| 46 | <ul style="list-style-type: none"> <li>bowel perforation)</li> </ul>                                                           |  |  |  |
| 47 | <ul style="list-style-type: none"> <li>• colectomy</li> </ul>                                                                  |  |  |  |
| 48 | <ul style="list-style-type: none"> <li>• thoracotomy</li> </ul>                                                                |  |  |  |
| 49 | <ul style="list-style-type: none"> <li>• open abdominal wound</li> </ul>                                                       |  |  |  |
| 50 | <ul style="list-style-type: none"> <li>(vacuum-assisted closure</li> </ul>                                                     |  |  |  |
| 51 | <ul style="list-style-type: none"> <li>(VAC) devices)</li> </ul>                                                               |  |  |  |
| 52 |                                                                                                                                |  |  |  |
| 53 |                                                                                                                                |  |  |  |
| 54 |                                                                                                                                |  |  |  |
| 55 |                                                                                                                                |  |  |  |
| 56 |                                                                                                                                |  |  |  |
| 57 |                                                                                                                                |  |  |  |
| 58 |                                                                                                                                |  |  |  |
| 59 |                                                                                                                                |  |  |  |
| 60 |                                                                                                                                |  |  |  |

|                                                                                                                                        |  |  |  |  |
|----------------------------------------------------------------------------------------------------------------------------------------|--|--|--|--|
| <ul style="list-style-type: none"> <li>• surgeon</li> <li>• surgical assistant</li> <li>• anesthesiology</li> <li>• nursing</li> </ul> |  |  |  |  |
| Overhead costs <ul style="list-style-type: none"> <li>• ICU days</li> <li>• ward days</li> </ul>                                       |  |  |  |  |

CT = computerized tomography; ELISA = enzyme-linked immunosorbent assay; ICU = intensive care unit; LAMP = loop-mediated isothermal amplification; MRI = magnetic resonance imaging; NM = nuclear medicine; PEG = percutaneous endoscopic gastrostomy; PCR = polymerase chain reaction; PROSPECT = Probiotics: Prevention of Severe Pneumonia and Endotracheal Colonization Trial; US = United States; VAC = vacuum-assisted closure; VAP = ventilator-associated pneumonia;

Supplemental Table 3: Health economic evaluation assumptions

| Assumption                                                                                                                                                                                                                                                                                                                                                                                                                                                                                                                                                                                                                                                                                                                                                    | Rationale                                                                                                                                                                                                                                                                                                                                                                                                                                                                             |
|---------------------------------------------------------------------------------------------------------------------------------------------------------------------------------------------------------------------------------------------------------------------------------------------------------------------------------------------------------------------------------------------------------------------------------------------------------------------------------------------------------------------------------------------------------------------------------------------------------------------------------------------------------------------------------------------------------------------------------------------------------------|---------------------------------------------------------------------------------------------------------------------------------------------------------------------------------------------------------------------------------------------------------------------------------------------------------------------------------------------------------------------------------------------------------------------------------------------------------------------------------------|
| <p>Prophylactic and therapeutic probiotic administration outside the ICU</p> <ul style="list-style-type: none"> <li>If no prophylactic/therapeutic probiotics was used prior to trial enrollment, we will assume study product (<i>Lactobacillus rhamnosus</i> GG prophylaxis or placebo) will be used for duration of stay in the ICU with no other probiotic co-administration;</li> <li>If open label probiotics were used in the ICU, we will assume study product (<i>Lactobacillus rhamnosus</i> GG prophylaxis or placebo) will still be used for duration of stay in the ICU (co-administered);</li> <li>After the duration of ICU stay (transfer to the ward), we assume that there will be no further probiotic administration</li> </ul>           | <p>Ward-based/pre-admission ICU prophylactic and therapeutic probiotic administration was not directly measured</p>                                                                                                                                                                                                                                                                                                                                                                   |
| <p>Variability in investigations and treatment practice of disease/illness</p> <ul style="list-style-type: none"> <li>Based on variability in incidence of disease/illness, we will investigate the incidence of each illness severity, and average resource utilization for a particular illness.</li> <li>We will utilize the mean costs for a particular illness (we will attempt to directly derive this variability from the case report forms) For patients who undergo multiple investigations, treatment (medications/procedures/surgeries) for a particular disease/illness, we will assume the lowest number of potential interventions to treat the disease/illness, as well as mean resource utilization for such events from PROSPECT</li> </ul> | <p>Various clinical diagnoses will have variability in severity, and therefore, variability in the way they are investigated and treated (i.e. <i>C. difficile</i> could be investigated/treated with only culture assay, abdominal x-ray and antibiotics to colectomy). Based on prior scoping reviews for VAP/CDAD, there will be variability in the resource utilization of each treatment/test based on illness severity, which may drive differences in resource utilization</p> |

Investigations of other infectious outcomes

- For those illnesses that are only investigated if positive or indeterminate cultures are detected (i.e. endocarditis), we will assume there is a potential minimum and maximal resource utilization that would be used to investigate/treat a specific diagnosis
- Certain assumptions will need to be made for healthcare resource utilization for certain services, investigations, procedures/surgeries, as they may not be explicitly captured in PROSPECT, but can be gleaned indirectly from the case report forms
- For example:
  - central-line blood stream infections would be assumed to warrant a replacement or previous venous or arterial catheters;
  - broncho-alveolar lavage (BAL) cultures were assumed to have a bronchoscopy procedure to perform them
  - CDAD was assumed to have an abdominal x-ray (at a minimum) for radiological investigation
    - At a maximum, a proportion of patients would receive at CT abdo, colonoscopy/flexible sigmoidoscopy, laparotomy, colectomy, fecal transplant, vacuum-assisted closure device
  - empyema/lung abscess would be assumed to be diagnosed by CT chest, and treated with a chest tube (with a proportion of patients with tissue plasminogen activator into the pleural cavity, or VATS thoracotomy with decortication and irrigation and debridement)
  - abdominal x-rays can be used to count the number of abdominal drains inserted
    - a proportion of patients were assumed to receive an abdominal ultrasound, CT abdo, MRI abdo
  - we will assume that a positive blood culture with specific organisms (known to cause endocarditis) would warrant a transthoracic echocardiogram ± transesophageal echocardiogram;
  - confirmed endocarditis would be investigated with a transthoracic echocardiogram ± transesophageal echocardiogram
  - mediastinitis would be assumed to be

There are certain investigations or interventions that would be expected to be associated with various disease state suspicions (and given correct circumstances, we would assume these would be tested/treated in these ways)

1  
2  
3 diagnosed by CT or MRI chest

- 4     ▪ at a maximum, they would receive  
5         an thoracotomy/sternotomy for an  
6         I&D and potential VAC dressing
- 7 ○ initiation (on the first day) of intermittent  
8     hemodialysis or continuous renal  
9     replacement therapy would incur a cost of  
10    central venous hemodialysis line placement
- 11 ○ suspected meningitis/encephalitis case  
12    would warrant a lumbar puncture ± CT or  
13    MRI head;
- 14 ○ osteomyelitis would warrant a NM scan or  
15    MRI;
- 16 ○ biliary tract infections would be assumed to  
17    have at minimum an abdominal ultrasound;
- 18     ▪ At a maximum, a proportion of  
19         patients would receive at CT abdo,  
20         ERCP, percutaneous transhepatic  
21         cholecystostomy (PTC) tube,  
22         cholecystectomy
- 23 ○ pancreatic infections would be assumed to  
24    have at minimum an abdominal ultrasound;
- 25     ▪ At a maximum, a proportion of  
26         patients would receive at CT abdo,  
27         MRI abdo, abdominal drain or  
28         aspiration
- 29 ○ typhilitis would be assumed to have at  
30    minimum an abdo X-ray;
- 31     ▪ At a maximum, a proportion of  
32         patients would receive at CT abdo
- 33 ○ toxic megacolon would be assumed to have  
34    at minimum an abdo X-ray;
- 35     ▪ At a maximum, a proportion of  
36         patients would receive at CT abdo
- 37 ○ urinary tract infection would be assumed to  
38    have at a urinalysis and urine culture
- 39 ○ sinusitis would be assumed to have  
40    investigations at baseline
- 41     ▪ At a maximum, a proportion of  
42         patients would receive at CT head
- 43 ○ septic arthritis would be assumed to have  
44    an aspiration culture at a minimum
- 45     ▪ At a maximum, a proportion of  
46         patients would receive an orthopedic  
47         surgery for I&D
- 48 ○ PEG tube insertion would be assumed to be  
49    placed when 1<sup>st</sup> record on the daily data  
50    form of PEG tube utilization (Daily Form 4.2  
51    of 3)
- 52 ○ Tracheostomy insertion would be assumed  
53    to be placed when 1<sup>st</sup> record on the daily  
54  
55  
56  
57  
58  
59  
60

|                                                                                                                                                                                                                                                                                                                                                                                                                                               |                                                                                                                                                          |
|-----------------------------------------------------------------------------------------------------------------------------------------------------------------------------------------------------------------------------------------------------------------------------------------------------------------------------------------------------------------------------------------------------------------------------------------------|----------------------------------------------------------------------------------------------------------------------------------------------------------|
| <p>data form (Daily Form 4.1 of 3 – Mechanical airway in place today)</p>                                                                                                                                                                                                                                                                                                                                                                     |                                                                                                                                                          |
| <p>Imputation of missing data</p> <ul style="list-style-type: none"> <li>• For those patients with missing data from a clinical outcomes perspective, multiple imputation methods will be utilized – including generalized estimating equations (GEEs)</li> <li>• For missing unit costs (which are not attainable from public jurisdiction databases or trial site-specific inquiries), we will utilize costing-ratio methodology</li> </ul> | <p>We will utilize standard multiple imputation methods to handle missing clinical outcome data, or costing-ratio methodology for missing unit costs</p> |

BAL = broncho-alveolar lavage; CDAD = C. Difficile-associated diarrhea; CT = computerized tomography; CXR = chest x-ray; ERCP = endoscopic retrograde cholangio-pancreatography; ICU = intensive care unit; I&D: irrigation & debridement; MRI = magnetic resonance imaging; NM = nuclear medicine; PEG = percutaneous endoscopic gastrostomy; PCR = polymerase chain reaction; PROSPECT = Probiotics: Prevention of Severe Pneumonia and Endotracheal Colonization Trial; US = United States; VAC = vacuum-assisted closure; VAP = ventilator-associated pneumonia; VATS = video-assisted thorascopic surgery



## CHEERS checklist—Items to include when reporting economic evaluations of health interventions

| Section/item                                           | Item No | Recommendation                                                                                                                                                                                                                                                                                                              | Reported on page No |
|--------------------------------------------------------|---------|-----------------------------------------------------------------------------------------------------------------------------------------------------------------------------------------------------------------------------------------------------------------------------------------------------------------------------|---------------------|
| <b>Title and abstract</b>                              |         |                                                                                                                                                                                                                                                                                                                             |                     |
| Title                                                  | 1       | Identify the study as an economic evaluation or use more specific terms such as “cost-effectiveness analysis”, and describe the interventions compared.                                                                                                                                                                     | Page 1              |
| Abstract                                               | 2       | Provide a structured summary of objectives, perspective, setting, methods (including study design and inputs), results (including base case and uncertainty analyses), and conclusions.                                                                                                                                     | Page 2              |
| <b>Introduction</b>                                    |         |                                                                                                                                                                                                                                                                                                                             |                     |
| Background and objectives                              | 3       | Provide an explicit statement of the broader context for the study.                                                                                                                                                                                                                                                         | Page 4-5            |
|                                                        |         | Present the study question and its relevance for health policy or practice decisions.                                                                                                                                                                                                                                       | Page 4-5            |
| <b>Methods</b>                                         |         |                                                                                                                                                                                                                                                                                                                             |                     |
| Target population and subgroups                        | 4       | Describe characteristics of the base case population and subgroups analysed, including why they were chosen.                                                                                                                                                                                                                | Page 5              |
| Setting and location                                   | 5       | State relevant aspects of the system(s) in which the decision(s) need(s) to be made.                                                                                                                                                                                                                                        | Page 5              |
| Study perspective                                      | 6       | Describe the perspective of the study and relate this to the costs being evaluated.                                                                                                                                                                                                                                         | Page 5              |
| Comparators                                            | 7       | Describe the interventions or strategies being compared and state why they were chosen.                                                                                                                                                                                                                                     | Page 5              |
| Time horizon                                           | 8       | State the time horizon(s) over which costs and consequences are being evaluated and say why appropriate.                                                                                                                                                                                                                    | Page 5              |
| Discount rate                                          | 9       | Report the choice of discount rate(s) used for costs and outcomes and say why appropriate.                                                                                                                                                                                                                                  | Page 5, Table1      |
| Choice of health outcomes                              | 10      | Describe what outcomes were used as the measure(s) of benefit in the evaluation and their relevance for the type of analysis performed.                                                                                                                                                                                     | Page 5              |
| Measurement of effectiveness                           | 11a     | <i>Single study-based estimates:</i> Describe fully the design features of the single effectiveness study and why the single study was a sufficient source of clinical effectiveness data.                                                                                                                                  | Page 5, 8           |
|                                                        | 11b     | <i>Synthesis-based estimates:</i> Describe fully the methods used for identification of included studies and synthesis of clinical effectiveness data.                                                                                                                                                                      | Not applicable      |
| Measurement and valuation of preference based outcomes | 12      | If applicable, describe the population and methods used to elicit preferences for outcomes.                                                                                                                                                                                                                                 | Not applicable      |
| Estimating resources and costs                         | 13°     | <i>Single study-based economic evaluation:</i> Describe approaches used to estimate resource use associated with the alternative interventions. Describe primary or secondary research methods for valuing each resource item in terms of its unit cost. Describe any adjustments made to approximate to opportunity costs. | Page 5-6            |
|                                                        | 13b     | <i>Model-based economic evaluation:</i> Describe approaches and data sources used to estimate                                                                                                                                                                                                                               | Not applicable      |

| Section/item                                                         | Item No | Recommendation                                                                                                                                                                                                                                                                                                                                        | Reported on page No |
|----------------------------------------------------------------------|---------|-------------------------------------------------------------------------------------------------------------------------------------------------------------------------------------------------------------------------------------------------------------------------------------------------------------------------------------------------------|---------------------|
|                                                                      |         | resource use associated with model health states. Describe primary or secondary research methods for valuing each resource item in terms of its unit cost. Describe any adjustments made to approximate to opportunity costs.                                                                                                                         |                     |
| Currency, price date, and conversion                                 | 14      | Report the dates of the estimated resource quantities and unit costs. Describe methods for adjusting estimated unit costs to the year of reported costs if necessary. Describe methods for converting costs into a common currency base and the exchange rate.                                                                                        | Page 5-7            |
| Choice of model                                                      | 15      | Describe and give reasons for the specific type of decision-analytical model used. Providing a figure to show model structure is strongly recommended.                                                                                                                                                                                                | Not applicable      |
| Assumptions                                                          | 16      | Describe all structural or other assumptions underpinning the decision-analytical model.                                                                                                                                                                                                                                                              | Table 4             |
| Analytical methods                                                   | 17      | Describe all analytical methods supporting the evaluation. This could include methods for dealing with skewed, missing, or censored data; extrapolation methods; methods for pooling data; approaches to validate or make adjustments (such as half cycle corrections) to a model; and methods for handling population heterogeneity and uncertainty. | Page 6-7            |
| <b>Results</b>                                                       |         |                                                                                                                                                                                                                                                                                                                                                       |                     |
| Study parameters                                                     | 18      | Report the values, ranges, references, and, if used, probability distributions for all parameters. Report reasons or sources for distributions used to represent uncertainty where appropriate. Providing a table to show the input values is strongly recommended.                                                                                   | Page 5-7            |
| Incremental costs and outcomes                                       | 19      | For each intervention, report mean values for the main categories of estimated costs and outcomes of interest, as well as mean differences between the comparator groups. If applicable, report incremental cost-effectiveness ratios.                                                                                                                | Page 5-7            |
| Characterising uncertainty                                           | 20a     | <i>Single study-based economic evaluation:</i> Describe the effects of sampling uncertainty for the estimated incremental cost and incremental effectiveness parameters, together with the impact of methodological assumptions (such as discount rate, study perspective).                                                                           | Page 5-7            |
|                                                                      | 20b     | <i>Model-based economic evaluation:</i> Describe the effects on the results of uncertainty for all input parameters, and uncertainty related to the structure of the model and assumptions.                                                                                                                                                           | Not applicable      |
| Characterising heterogeneity                                         | 21      | If applicable, report differences in costs, outcomes, or cost-effectiveness that can be explained by variations between subgroups of patients with different baseline characteristics or other observed variability in effects that are not reducible by more information.                                                                            | Page 7              |
| <b>Discussion</b>                                                    |         |                                                                                                                                                                                                                                                                                                                                                       |                     |
| Study findings, limitations, generalizability, and current knowledge | 22      | Summarise key study findings and describe how they support the conclusions reached. Discuss limitations and the generalizability of the findings and how the findings fit with current knowledge.                                                                                                                                                     | Page 7              |
| <b>Other</b>                                                         |         |                                                                                                                                                                                                                                                                                                                                                       |                     |
| Source of funding                                                    | 23      | Describe how the study was funded and the role of                                                                                                                                                                                                                                                                                                     | Page 9              |

1  
2  
3  
4  
5  
6  
7  
8  
9  
10  
11  
12  
13  
14  
15  
16  
17  
18  
19  
20  
21  
22  
23  
24  
25  
26  
27  
28  
29  
30  
31  
32  
33  
34  
35  
36  
37  
38  
39  
40  
41  
42  
43  
44  
45  
46  
47  
48  
49  
50  
51  
52  
53  
54  
55  
56  
57  
58  
59  
60

| Section/item          | Item No | Recommendation                                                                                                                                                                                                                                    | Reported on page No |
|-----------------------|---------|---------------------------------------------------------------------------------------------------------------------------------------------------------------------------------------------------------------------------------------------------|---------------------|
|                       |         | the funder in the identification, design, conduct, and reporting of the analysis. Describe other non-monetary sources of support.                                                                                                                 |                     |
| Conflicts of interest | 24      | Describe any potential for conflict of interest of study contributors in accordance with journal policy. In the absence of a journal policy, we recommend authors comply with International Committee of Medical Journal Editors recommendations. | Page 15             |

For consistency, the CHEERS statement checklist format is based on the format of the CONSORT statement checklist

# BMJ Open

## Economic Evaluation alongside the Probiotics to Prevent Severe Pneumonia and Endotracheal Colonization Trial (E-PROSPECT): Study Protocol

|                                 |                                                                                                                                                                                                                                                                                                                                                                                                                                                                                                                                                                                                                                                                                                                                                                                                                                                                                                                                                                                                                  |
|---------------------------------|------------------------------------------------------------------------------------------------------------------------------------------------------------------------------------------------------------------------------------------------------------------------------------------------------------------------------------------------------------------------------------------------------------------------------------------------------------------------------------------------------------------------------------------------------------------------------------------------------------------------------------------------------------------------------------------------------------------------------------------------------------------------------------------------------------------------------------------------------------------------------------------------------------------------------------------------------------------------------------------------------------------|
| Journal:                        | <i>BMJ Open</i>                                                                                                                                                                                                                                                                                                                                                                                                                                                                                                                                                                                                                                                                                                                                                                                                                                                                                                                                                                                                  |
| Manuscript ID                   | bmjopen-2019-036047.R1                                                                                                                                                                                                                                                                                                                                                                                                                                                                                                                                                                                                                                                                                                                                                                                                                                                                                                                                                                                           |
| Article Type:                   | Protocol                                                                                                                                                                                                                                                                                                                                                                                                                                                                                                                                                                                                                                                                                                                                                                                                                                                                                                                                                                                                         |
| Date Submitted by the Author:   | 19-May-2020                                                                                                                                                                                                                                                                                                                                                                                                                                                                                                                                                                                                                                                                                                                                                                                                                                                                                                                                                                                                      |
| Complete List of Authors:       | Lau, Vincent; University of Alberta Faculty of Medicine and Dentistry, Department of Critical Care<br>Cook, Deborah; McMaster University,<br>Fowler, Robert; Sunnybrook Research Institute, Sunnybrook Health Sciences Institute<br>Rochweg, Bram; McMaster University, Medicine (Critical Care)<br>Johnstone, J; University of Toronto Dalla Lana School of Public Health, Public Health Ontario<br>Lauzier, François; Centre de Recherche du CHU de Québec - Université Laval, Population Health and Optimal Health Practices Research Unit (Trauma - Emergency - Critical Care Medicine)<br>Marshall, John; University of Toronto, Department of Surgery<br>Basmaji, John; Western University, Department of Medicine, Division of Critical Care<br>Heels-Ansdell, Diane; McMaster University, Clinical Epidemiology and Biostatistics<br>Thabane, Lehana ; McMaster University, Clinical Epidemiology & Biostatistics<br>Xie, Feng; McMaster University, Department of Clinical Epidemiology & Biostatistics |
| <b>Primary Subject Heading</b>: | Health economics                                                                                                                                                                                                                                                                                                                                                                                                                                                                                                                                                                                                                                                                                                                                                                                                                                                                                                                                                                                                 |
| Secondary Subject Heading:      | Epidemiology, Infectious diseases, Medical management, Research methods, Intensive care                                                                                                                                                                                                                                                                                                                                                                                                                                                                                                                                                                                                                                                                                                                                                                                                                                                                                                                          |
| Keywords:                       | Adult intensive & critical care < INTENSIVE & CRITICAL CARE, HEALTH ECONOMICS, INFECTIOUS DISEASES, STATISTICS & RESEARCH METHODS, MICROBIOLOGY, PREVENTIVE MEDICINE                                                                                                                                                                                                                                                                                                                                                                                                                                                                                                                                                                                                                                                                                                                                                                                                                                             |
|                                 |                                                                                                                                                                                                                                                                                                                                                                                                                                                                                                                                                                                                                                                                                                                                                                                                                                                                                                                                                                                                                  |

SCHOLARONE™  
Manuscripts



I, the Submitting Author has the right to grant and does grant on behalf of all authors of the Work (as defined in the below author licence), an exclusive licence and/or a non-exclusive licence for contributions from authors who are: i) UK Crown employees; ii) where BMJ has agreed a CC-BY licence shall apply, and/or iii) in accordance with the terms applicable for US Federal Government officers or employees acting as part of their official duties; on a worldwide, perpetual, irrevocable, royalty-free basis to BMJ Publishing Group Ltd ("BMJ") its licensees and where the relevant Journal is co-owned by BMJ to the co-owners of the Journal, to publish the Work in this journal and any other BMJ products and to exploit all rights, as set out in our [licence](#).

The Submitting Author accepts and understands that any supply made under these terms is made by BMJ to the Submitting Author unless you are acting as an employee on behalf of your employer or a postgraduate student of an affiliated institution which is paying any applicable article publishing charge ("APC") for Open Access articles. Where the Submitting Author wishes to make the Work available on an Open Access basis (and intends to pay the relevant APC), the terms of reuse of such Open Access shall be governed by a Creative Commons licence – details of these licences and which [Creative Commons](#) licence will apply to this Work are set out in our licence referred to above.

Other than as permitted in any relevant BMJ Author's Self Archiving Policies, I confirm this Work has not been accepted for publication elsewhere, is not being considered for publication elsewhere and does not duplicate material already published. I confirm all authors consent to publication of this Work and authorise the granting of this licence.

## Economic Evaluation alongside the Probiotics to Prevent Severe Pneumonia and Endotracheal Colonization Trial (E-PROSPECT): Study Protocol

Vincent I. Lau, MD, FRCPC<sup>1,2</sup>  
Deborah J. Cook, MD, MSc, FRCPC<sup>2,3</sup>  
Robert Fowler, MDCM, MSc, FRCPC<sup>4</sup>  
Bram Rochweg, MD, MSc, FRCPC<sup>2,3</sup>  
Jennie Johnstone, MD, FRCPC, PhD<sup>5,6</sup>  
François Lauzier, MD, MSc, FRCPC<sup>7</sup>  
John C. Marshall MD, FRCSC<sup>4,8</sup>  
John Basmaji, MD, FRCPC<sup>9</sup>  
Diane Heels-Ansdell, MSc<sup>2,10</sup>  
Lehana Thabane, PhD<sup>2,10</sup>  
Feng Xie, PhD<sup>2,11</sup>

Corresponding Author: Vincent Lau, Department of Critical Care, University of Alberta, 8440 112 Street, Edmonton, Alberta, Canada; vince.lau@ualberta.ca

<sup>1</sup>Department of Critical Care Medicine, University of Alberta, Edmonton, Alberta, Canada

<sup>2</sup>Department of Health Research Methods, Evidence, and Impact, McMaster University, Hamilton, Ontario, Canada

<sup>3</sup>Department of Medicine, Division of Critical Care, McMaster University, Hamilton, Ontario, Canada

<sup>4</sup>Interdepartmental Division of Critical Care Medicine, University of Toronto, Ontario, Canada

<sup>5</sup>Public Health Ontario, Toronto, Ontario, Canada

<sup>6</sup>Department of Laboratory Medicine and Pathobiology, University of Toronto, Toronto, Ontario, Canada

<sup>7</sup>Departments of Medicine, Anesthesiology & Critical Care, Université Laval, Québec City, Québec, Canada

<sup>8</sup>Department of Surgery, University of Toronto, Toronto, Ontario, Canada

<sup>9</sup>Department of Medicine, Division of Critical Care Medicine, Western University, London, Ontario, Canada

<sup>10</sup>Biostatistics Unit, St. Joseph's Healthcare Hamilton, Hamilton, Ontario, Canada

<sup>11</sup>Centre for Health Economics and Policy Analysis, Programs for Health Economics and Outcomes Measures, McMaster University, Hamilton, Ontario, Canada

**Key Words:** Probiotics, critical care, economics, infection, PROSPECT, cost-effectiveness, ventilator-associated pneumonia

**Manuscript Word Count:** 3017

**Abstract Word Count:** 315

## Abstract

### Introduction

Ventilator-associated pneumonia (VAP) is a common healthcare-associated infection in the intensive care unit (ICU). Probiotics are defined as live microorganisms that may confer health benefits when ingested. Prior randomized trials suggest that probiotics may prevent infections such as VAP and *Clostridioides difficile*-associated diarrhea (CDAD). PROSPECT (Probiotics to Prevent Severe Pneumonia and Endotracheal Colonization Trial) is a multicenter, double-blinded, randomized controlled trial comparing the efficacy of the probiotic *Lactobacillus rhamnosus* GG with usual care versus usual care without probiotics in preventing VAP and other clinically important outcomes in critically ill patients admitted to the ICU.

### Methods and Analysis

The objective of E-PROSPECT is to determine the incremental cost effectiveness of *Lactobacillus rhamnosus* GG plus usual care versus usual care without probiotics in critically ill patients. E-PROSPECT will be performed from the public healthcare payer's perspective over a time horizon from ICU admission to hospital discharge.

We will determine probabilities of in-ICU and in-hospital events from all patients alongside PROSPECT. We will retrieve unit costs for each resource use item using jurisdiction-specific public databases, supplemented by individual site unit costs if such databases are unavailable. Direct costs will include medications, personnel costs, radiology/laboratory testing, operative/non-operative procedures and per-day hospital 'hotel' costs not otherwise encompassed. The primary outcome is the incremental cost per VAP prevented between the two treatment groups. Other clinical events such as CDAD, antibiotic-associated diarrhea (AAD), and in-hospital mortality will be included as secondary outcomes. We will perform pre-specified subgroup analyses (medical/surgical/trauma; age; frailty status; antibiotic use; prevalent vs. no prevalent pneumonia) and probabilistic sensitivity analyses for VAP, then generate confidence intervals using the non-parametric bootstrapping approach.

### Ethics and Dissemination

Study approval for E-PROSPECT was granted by the Hamilton Integrated Research Ethics Board (HIREB) of McMaster University on July 29, 2019. Informed consent was obtained from the patient or substitute decision maker in PROSPECT. The findings of this study will be published in peer-reviewed journals.

### Strengths and limitations of this study:

#### Strengths of this protocol:

- *A priori* study protocol with prospective clinical and economic data collection with representation from international jurisdictions.
- The balance of randomization reduces risk of bias in the cost-effectiveness analysis occurring on patient level.

#### Limitations of this protocol:

- A relatively short time-horizon.
- Primary outcome of incremental cost to avoid a clinical event (cost-effectiveness approach), rather than a cost-utility approach (incremental cost per quality-adjusted life year).

er review only



## Background

Ventilator-associated pneumonia (VAP) is the most common healthcare-associated infection in the intensive care unit (ICU), resulting in a high burden of illness.[1,2] A 2005 systematic review found a pooled cumulative VAP incidence of 23% (95% confidence interval (CI): 19%–27%) in randomized controlled trials (RCTs) and 10% (95% CI: 7–13%) in observational studies.[2] In addition, VAP is associated with a two-fold attributable risk of dying in the ICU (odds ratio (OR) 2.02, 95% CI: 1.2–3.6), and the cost attributed to VAP ranges from US \$10,000 to \$13,000 per patient.[2] Thus, VAP prevention is a patient-important safety goal during critical illness.[1,3,4]

Probiotics are defined as “live microorganisms which, when administered in adequate amounts, confer a potential health benefit on the host.”[5,6] They are reported to enhance gut barrier function, reduce host pathogenic bacterial load, modify gut microbiota, and modulate the immune system.[7–10] Probiotics studies suggest benefits including reduced incidence of healthcare-associated infections.[11–14] A recent meta-analysis of RCTs suggests that probiotics administered to critically ill mechanically ventilated patients were associated with a 26% lower VAP rate (95% CI: 10–39%) and 20% lower infection rates overall (95% CI: 5–32%).[15] However, these findings arose from 30 small, mostly low quality single-center RCTs (n=18–300, 2972 total patients in the meta-analysis), yielding imprecise estimates and results with uncertain internal and external validity.[15]

Further, probiotics may reduce the incidence of diarrhea, specifically *Clostridioides difficile*-associated diarrhea (CDAD), which can cause serious complications such as pseudomembranous colitis, toxic megacolon, and death.[16] In a recent Cochrane systematic review and meta-analysis of 31 RCTs including 8672 patients who were receiving antibiotics and concurrent probiotics, moderate certainty evidence suggested that probiotics were effective at reducing the burden of CDAD for patients and the healthcare system.[16]

We recently performed a systematic review of economic evaluations examining probiotics in hospitalized patients, evaluating their cost-effectiveness for reducing VAP, CDAD and antibiotic-associated diarrhea (AAD), while also identifying variables that could drive costs.[17] From 721 potentially relevant studies, 7 met the eligibility criteria. Probiotics appear to be either cost-effective or cost-saving in 6 of 7 studies compared to other prophylactic strategies within usual care to prevent healthcare-associated infection in acutely ill hospitalized patients. However, Grading of Recommendations Assessment, Development and Evaluation (GRADE) evaluations indicated a high risk of bias and very low quality/certainty of clinical evidence, such that cost-effectiveness evidence on the use of probiotics in adult hospitalized patients was weak. Furthermore, probiotic manufacturers funded 3 of 7 (43%) studies, all of which were reported as either cost-effective or cost-saving.[17] Some probiotic economic evaluations were designed after the results of the trial were published.

Therefore, we have designed this economic evaluation (E-PROSPECT) alongside the multicenter PROSPECT (ClinicalTrials.gov number: NCT01782755), assessing the incremental cost effectiveness ratio (ICER) of probiotics versus usual care for critically ill adult patients.[18–20]

## METHODS

---

## Overview of PROSPECT

PROSPECT is a randomized, double-blinded multicenter controlled trial. It used a central system for concealed 1:1 ratio to randomize patients (in variable unspecified block sizes, stratified by center and by medical, surgical or trauma admission status) to either  $1 \times 10^{10}$  colony forming units (CFU) of *L. rhamnosus* GG (iHealth, Inc.) or an identical placebo suspended in tap water administered twice daily via feeding tube in the ICU.[20] PROSPECT has enrolled 2653 critically ill patients between October 2013 and March 2019 throughout 44 ICUs (41 in Canada, 2 in the United States and 1 in Saudi Arabia). Patients, healthcare providers, investigators and research personnel were all blinded to group allocation. Sample size calculation has been previously described.[18–20]

## E-PROSPECT design

The primary objective of E-PROSPECT is to estimate the incremental cost per VAP prevented arising from a prevention strategy of using probiotics with usual care (the probiotics arm) versus usual care without probiotics (the usual care arm) during hospitalization. Our secondary analyses of ICERs include healthcare-associated complications (CDAD, AAD) and mortality.[18–20]

Our economic evaluation will be performed from the public healthcare payer's perspective,[21] over the time horizon of the ICU admission to hospital discharge or death (Table 1). Our economic evaluation protocol was developed (Table 1) according to established CHEERS (Consolidated Health Economic Evaluation Reporting Standards) and international cost-effectiveness analysis (CEA) guidelines.[22,23]

## Clinical outcomes

Clinical outcomes that will be examined in E-PROSPECT are described with definitions in Supplemental Table 1 that were previously described from PROSPECT [20]. Clinical events such as VAP (primary outcome), CDAD, AAD and hospital mortality (secondary outcomes) will be gleaned from PROSPECT, with a statistical analysis methodology previously described [20]. For the dichotomous outcomes, we will use time-to-event analyses. Hazard ratios and associated 95% confidential intervals will be estimated using a stratified Cox proportional hazards model. For continuous outcomes, we will report estimates of the difference between intervention and control groups, 95% confidence intervals (CIs) and associated p-values [20].

These dichotomous outcomes with proportions and continuous outcomes with point-estimates (e.g. length of stay, which will be used for calculation of resource utilization) will be used to calculate both incremental costs (resource utilization) and effects. Incremental effects will be defined as the difference in per-patient event rates or the difference in proportion of a clinical event (e.g. VAP) between groups.

## Health care resource utilization

Based on our systematic literature review[17] and published evidence[18–20], we identified a list of relevant health care resource items that includes medications, physician/personnel utilization, diagnostic radiology/laboratory testing, and operative/non-operative procedures and per-day hospital 'hotel' costs not otherwise encompassed. Antimicrobial use in ICU will be defined as days of therapy (DOT), defined daily dose (DDD) of therapy and antimicrobial-free days (AFDs).[24,25] Only systemic antimicrobials will be captured whether prophylactic or therapeutic in intent. Topical creams, eye/ear drops and inhaled antimicrobials will be excluded. We will also document the duration of mechanical ventilation, ICU and hospital length of stay and mortality. The health care resource uses will be collected alongside PROSPECT. For missing resource use data, we will choose appropriate imputation methods according to the type and distribution of the missing data. [26,27] Otherwise, we will utilize an

1  
2  
3 appropriate “standard dose” for non-titratable medications (e.g. chlorhexidine), and a clinically  
4 appropriate “medium dose” for titratable medications (e.g. vasopressors or inotropes).  
5

### 6 **Unit costs**

7 Unit costs for health care resource items will be identified through jurisdiction-specific  
8 (regions/provinces/states which manage health care delivery in their area) public databases (e.g.  
9 pharmacy drug formularies, physician billing schedule of benefits, Medicare/Medicaid  
10 reimbursement manuals, labour department wages/salaries, manufacturer costs). When there is  
11 a small sample or distribution of unit costs (i.e. a provincial jurisdiction may have the same cost  
12 for a particular procedure), we will estimate the standard error if possible, or incorporate a  $\pm 25\%$   
13 error around the mean unit cost distribution.  
14

15 For unit costs not represented in public databases, we will obtain site-specific unit costs  
16 from the participating PROSPECT sites. We will first conduct a pilot study of unit cost acquisition  
17 at a convenience sample of 8 participating centers (Canadian: British Columbia, Alberta,  
18 Manitoba, Ontario, Québec, Nova Scotia; US: Minnesota, Missouri; and Saudi Arabia) to request  
19 a list of unit costs (Supplemental Table 2: E-PROSPECT unit cost data extraction table). The site  
20 investigator or research coordinator will then contact the most appropriate individual in each  
21 hospital’s accounting, human resources, pharmacy, radiology or laboratory departments to obtain  
22 the unit costs. [28] In all cases, costs will be requested (if available). If only charges are known,  
23 then we will attempt to convert to costs by the institution’s cost-to-charge estimate for that item,  
24 where it exists [28].  
25

26 Direct costs will be presented in the pre-specified cost categories (Supplemental Table 2).  
27 Assumptions regarding resource utilization are presented in Supplemental Table 3. We will  
28 assess direct unit costs for study product-related resources associated with outcomes of VAP,  
29 CDAD, AAD and mortality. If a specific line-item unit cost is not attainable for a specific  
30 jurisdiction,[28] we will: 1) ask another site within the same jurisdiction for missing unit costs; 2)  
31 derive a cost-ratio from acquired line-items (i.e. drug costs both known in 2 jurisdictions), then  
32 using the cost-ratio impute the missing line-item unit costs for the missing jurisdiction (by  
33 multiplying the cost-ratio against a known jurisdiction’s acquired line-item to impute the line-item  
34 unit cost for the missing jurisdiction). 3) If line-item unit costs are still missing after multiple  
35 imputation (with missing variables), a mean unit cost approach will be utilized for the remaining  
36 jurisdictions which did report unit costs.  
37

38 The pilot phase may inform amendments to our protocol. For example, if a unit cost for a  
39 particular line-item is deemed to be small and/or has a low clinical incidence rate, then that line-  
40 item may be removed from the final analysis. Items without a difference in clinical  
41 outcome/resource utilization between intervention and control groups but which contribute  
42 substantially to costs may still be retained (even if little to no incremental difference in costs would  
43 exist between the two arms) in order to maintain face validity and accurately reflect the magnitude  
44 of costs for hospitalization of a critically ill patient. Once the list of line-items has been pared down  
45 to those which are deemed to be cost drivers, and clinically relevant while also feasible to obtain,  
46 the remaining line-item list will be surveyed across a sampling of individual sites from each  
47 representative jurisdiction from PROSPECT.

48 Unit cost data will be summarized among all sites, and by country, to explore variability  
49 across centers and countries and to improve the generalizability of results. Visible outliers will be  
50 reconfirmed with individual hospital contacts. Participating sites will be queried to determine if  
51 particular costs have changed substantially (for example, by more than 25%), beyond inflationary  
52 or deflationary changes, over the course of the study. If there are substantial changes that have  
53 occurred over time, we will use the mean unit costs adjusted for inflation over the mean duration  
54 of the trial.[28]  
55

### 56 **Cost analysis**

1  
2  
3 The cost for each resource use item will be calculated by multiplying the natural resource  
4 utilization units by the unit cost. The total cost per patient will be the sum of the cost of items  
5 utilized from the time of randomization until discharge from hospital or death. The incremental  
6 mean cost will be estimated by calculating the difference in the total per patient costs between  
7 the two groups. All costs will be converted to 2019 United States dollars, accounting for annual  
8 inflation. [29–33]

9 We plan on using international currency conversion, instead of purchase power parity  
10 (PPP)-based conversions, because health-specific PPPs are not available for all participating  
11 countries, and non-health PPP conversion rates vary substantially over the period of the  
12 analysis.[30] Country-specific costs will be considered only in sensitivity analyses.

13  
14 Incremental costs will be calculated using the difference in mean per patient cost between  
15 the two treatment arms. We have developed a costing operations manual outlining this process  
16 (Supplemental Table 4: E-PROSPECT costing manual). [30]

### 17 18 **Base-Case Cost Effectiveness Analyses**

19 Means (standard deviations) or frequency (percentage) will be used to describe effect and  
20 cost estimates wherever appropriate. Chi-square tests and two-sample t-test comparisons will be  
21 used as appropriate to compare baseline characteristics between the two arms. The primary  
22 outcome will be based on the intention-to-treat principle and will form the clinical event estimates  
23 for the economic evaluation. Regression analyses may be performed if there is residual  
24 confounding, based on previously described methodology [20].

25 The base case incremental cost-effectiveness ratio (ICER) is the ratio of incremental costs  
26 per VAP prevented of probiotics versus usual care during the period of hospitalization (from ICU  
27 admission to hospital discharge or death). The incremental mean costs will be estimated from all  
28 patients in both groups based on multiplying the resource unit cost by resource utilization as  
29 described above. The incremental mean effects will be derived from PROSPECT, where  
30 incremental effects were defined as the difference in per-patient event rates or the difference in  
31 proportion of a clinical event (e.g. VAP) between groups [28, 40]. In secondary analysis we will  
32 also calculate ICER using other clinical outcomes (i.e., CDAD, AAD, mortality). If there is  
33 dominance in cost effectiveness (i.e. one treatment is better at lower cost than the other  
34 treatment), we will present the difference in cost and effect separately, without calculating the  
35 ICER for the base case analysis. When there is no difference in clinical outcomes, we will present  
36 incremental cost and effects separately, without calculating an ICER for the base case analysis.

### 37 38 39 **Subgroup analyses**

40 As subgroup analyses, we will investigate specific patients who may have differential  
41 effects and costs as compared to the entire population, including: diagnostic category (medical,  
42 surgical, trauma) [2]; age <65 years, 65-75 years and >75 years [34,35]; frailty status (baseline  
43 Clinical Frailty Score  $\geq 5$  of 9 versus) [36]; patients who received/did not receive antibiotics within  
44 2 days of randomization [20]; prevalent (present at the time of enrollment) vs. no prevalent  
45 pneumonia [20].

### 46 47 48 **Uncertainty analyses**

49 Because patient characteristics and costs may differ in different jurisdictions and outside  
50 clinical trials settings, and there will be uncertainty associated in the estimation of each group's  
51 clinical outcomes and separately in the associated group's costs, we have prospectively planned  
52 an uncertainty analysis to explore how ICERs may change with plausible ranges in costs of  
53 probiotics.

54 To test the robustness of our results (and determine the uncertainty associated with cost  
55 and effects estimation), we will perform a probabilistic sensitivity analysis of pairs of known costs  
56 and effects, using non-parametric bootstrapping techniques to generate 95% confidence  
57

1  
2  
3 intervals. We will perform 1000 bootstrap simulations in the following manner: each simulation will  
4 draw the same number of patients per group (as per intention-to-treat), with replacement (for both  
5 events and cost) in pairs. For each sample, the difference in event rate and cost was calculated,  
6 obtaining 1000 pairs of differences in cost and event rate. [37,38] Cost effectiveness acceptability  
7 curves will be used to present the probability of probiotics being cost effective over a wide range  
8 of willingness-to-pay thresholds [21].

9  
10 Scenario analyses will also be performed with variations of estimates of pairs of potentially  
11 influential variables (i.e. costs of probiotics, per day cost of care in ICU and hospital wards) across  
12 plausible ranges (variation of costs: 50-150%) to explore potential cost differences in higher- and  
13 lower-spending health care jurisdictions to determine if different estimates change the overall  
14 results.

15 All analyses will be undertaken using Excel (Microsoft Corp, Redmond Washington, US),  
16 and SAS (Cary, North Carolina, US).

### 17 18 **Patient and Public Involvement**

19 Patients or the public were not involved in the development of the research question,  
20 design, or conduct, or reporting, or dissemination plans of our research. The burden of the  
21 intervention was not assessed the patients themselves.

### 22 23 **Ethics and Dissemination**

24 Research ethics approval for E-PROSPECT was granted by the Hamilton Integrated  
25 Research Ethics Board (HIREB) of McMaster University (project identifier: REB#:15-322).  
26 Informed consent was obtained from each participant in PROSPECT, or their substitute decision-  
27 maker, in accordance with local REB approvals. We anticipate that a majority of sites participating  
28 in E-PROSPECT will consider central HIREB approval as satisfactory to obtain additional non-  
29 specific patient-based costing data from their center. All economic data, as with trial data, will be  
30 de-identified, maintained in a password-protected and encrypted laptop or desktop, in locked  
31 offices. All de-identified datasets, technical appendices and statistical code will be published  
32 alongside the economic evaluation. Knowledge translation of the results will be disseminated to  
33 patients, public and healthcare providers through peer-review journals. The CHEERS checklist  
34 has been completed (Supplemental Table 5).

### 35 36 37 38 **Discussion**

39 PROSPECT is the largest trial undertaken of probiotic usage for VAP prophylaxis in  
40 critically ill patients. Although probiotics have been shown in prior trials to prevent VAP and CDAD,  
41 their relative effects, side-effects and cost-effectiveness remain uncertain. PROSPECT will  
42 determine whether probiotics reduce the frequency of VAP and other healthcare-associated  
43 complications during critical illness.[18–20]

44 An economic evaluation jointly considers both costs and effects between alternative  
45 treatment options. Thus, physicians, administrators and policy-makers can know whether a new  
46 treatment provides good value for the healthcare expenditure. E-PROSPECT will answer these  
47 questions and address the cost-effectiveness of probiotics for VAP prevention. The literature  
48 currently has a paucity of health economic evaluations, illustrating the importance of E-  
49 PROSPECT.[39]

### 50 51 52 **Strengths and Limitations**

53 Some aspects of our methodology have potential limitations. First, the time-horizon is  
54 relatively short, with no outpatient follow-up (only reporting in-hospital outcomes). Other studies  
55 have utilized relative, non-fixed time horizons in health economic evaluations,[40] including those  
56 investigating probiotics.[41,42] We will carefully interpret these cost-effectiveness ratios in context  
57

1  
2  
3 from the short time horizon. Second, our primary outcome is the incremental cost to avoid a VAP  
4 event and other clinically important outcomes, not the incremental cost per quality-adjusted life  
5 year gained in a cost-utility analysis [21]. PROSPECT is not designed to measure long-term  
6 outcome or downstream life expectancy (hence no lifetime time horizon). However, if PROSPECT  
7 shows a difference in hospital survival due to probiotics, this will be addressed as a secondary  
8 outcome. As with all efficacy trials, the generalizability and external validity of a health economic  
9 evaluation concurrently performed with an RCT may not represent the same treatment effects  
10 and costs as in routine clinical practice.

11 E-PROSPECT has several advantages.[43] First, we reduce the potential for investigator  
12 hypothesis-driven biases by pre-specifying our parameters of analysis (subgroup and sensitivity  
13 analysis) for the health economic evaluation prior to unblinding of the trial. Second, trial  
14 randomization can reduce bias and confounding according to different baseline characteristics  
15 between study groups. Third, the concurrent collection of clinical and economic data can reduce  
16 the costs of data collection and minimize the possible problem of missing data if attempting to  
17 obtain it retrospectively. Fourth, we have chosen to gather costs from healthcare systems from  
18 multiple countries participating in the PROSPECT trial. We anticipate a wide variability in  
19 institutional reporting patient-specific cost accounting.[28,40] Although this has the potential to  
20 introduce variability in cost estimates, this approach will also likely enhance the generalizability of  
21 our results. Finally, timely economic data can be useful to healthcare policy-makers to aid in  
22 resource allocation decisions. There are several clinician-researchers that are advocating for the  
23 embracing the science of value in healthcare,[44] while others state that cost-effectiveness  
24 analysis should be mandatory in clinical-effectiveness research to aid in clinical guideline  
25 development and public healthcare decision policy.[45] By conducting our economic analysis  
26 concurrent with the PROSPECT trial, we take advantage of each of these strengths.[28]  
27  
28

## 29 **Acknowledgements**

30 PROSPECT was designed by the PROSPECT Steering Committee and improved by Drs.  
31 Dawn Bowdish, Michael Surette and Erick Duan, the PROSPECT Investigators and Research  
32 Coordinators and the Canadian Critical Care Trials Group. We are grateful for the commitment of  
33 all our colleagues in participating centers, and staff at the Methods Center for their expertise  
34 including Nicole Zytaruk, Lois Saunders, Shelley Anderson-White, Mary Copland, Megan Davis,  
35 France Clarke and Alyson Takaoka.  
36  
37

## 38 **Funding**

39 This economic evaluation (E-PROSPECT) and PROSPECT is funded by the CIHR,  
40 McMaster University, St. Joseph's Healthcare Hamilton, Canadian Frailty Network, Physicians  
41 Services Incorporated of Ontario, the Hamilton Academic Health Sciences Organization and the  
42 Academic Medical Organization of Southwestern Ontario. DJC is a Canada Research Chair of  
43 the Canadian Institutes of Health Research. Study products were donated by i-Health, Inc., the  
44 manufacturers of *L. rhamnosus* GG; however, no funding for either the trial itself or the economic  
45 evaluation was received from the manufacturers of any probiotic or other agent involved in VAP  
46 prevention or treatment.  
47

48 None of the funders played a role in the conception, design, conduct, oversight, analysis,  
49 interpretation or decision to submit this manuscript for publication or in the preparation, review or  
50 approval of the manuscript.  
51  
52

## 53 **Participating Centers**

## 54 **PROSPECT Collaborators**

## **Canada**

### **St Joseph's Healthcare, Hamilton, ON**

Dr Deborah Cook (Lead); Dr Erick Duan, Dr Mark Soth, (Co-Investigators); France Clarke, Mary Copland; Neala Hoad, Marnie Jakab, Melissa Shears, Alyson Takaoka, Nicole Zytaruk (Research Coordinators); Christa Connolly, Denise Davis, Catherine Eaton, Tracy Gallinas, Jean Lee-Yoo, Connie Lukinuk, Leia Musielak, Nancy Pavunkovic, Joy Pelayo, Kaitlyn Phillips, Catherine Pracsovics, Julia Raimondo, Vida Stankus, Christine Wallace, Angela Wright, Crystal Young (Pharmacy).

### **Hamilton General Hospital, Hamilton Health Science Center, Hamilton, ON**

Dr Maureen Meade (Lead); Dr Emilie Belley-Cote (Co-Investigator) Katrina Fimiani, Lori Hand, Dr Harjot Jagdey, Lisa Klotz, Alexandra Sabev, Nevena Savija (Research Coordinators); Deanne Cosentino, Diane Lourenco, Julie Misina, Gita Sobhi (Pharmacy).

### **Juravinski Hospital Hamilton Health Science Centre, Hamilton, ON**

Dr Timothy Karachi (Lead), Dr Bram Rochweg (Co-Investigator); Mashari Alghuroba, Alia Khaled, Lauren Locco, Tina Millen, Ryan Vaisler (Research Coordinators); Maya Biljan, Deanne Cosentino, Brittany Marriott, Gita Sobhi (Pharmacy).

### **St Michael's Hospital, Toronto, ON**

Dr John Marshall (Lead); Dr Jan Friedrich (Co-Investigator); Jennifer Hodder, Imrana Khalid, Julie Lee, Yoon Lee, Pragma Roy, Kurtis Salway, Gyan Sandhu, Marlene Santos, Orla Smith, Melissa Wang (Research Coordinators); Norman Dewhurst, Ann Dowbenka, Ann Kosinski, Terri Norrie, Ranjit Parhar, Laura Parsons, Johanna Proceviat, Gitana Ramonas, Mae Yuen (Pharmacy).

### **St Paul's Hospital, Vancouver BC**

Dr Peter Dodek (Lead); Dr Najib Ayas (Co-Investigator); Maria Agda, Victoria Alcuaz, Betty Jean Ashley, Kelsey Brewer, Janice Palmer (Research Coordinators); Glen Brown, Mara Pavan (Pharmacy).

### **Mount Sinai Hospital, Toronto, ON**

Dr Geeta Mehta (Lead), Dr Stephen Lapinsky, Dr Laveena Munshi; Maedean Brown, Brittany Giacomino, Marnie Jakab, Alan Kraguljac, Sumesh Shah, Erik Tamberg, Laura Vergeer (Research Coordinators); Doret Cheng, Gagan Grewal, Andrew Han, Holly Leung, Ioanna Mantas, Hilary Rodrigues, Andrew Wyllie (Pharmacy).

### **CHU de Québec-Université Laval (Hôpital de l'Enfant-Jésus), Québec City, QC**

Dr François Lauzier (Lead); Dr Alexis Turgeon (Co-Investigator); Danny Barriault, David Bellemare, Anick Boivin, Sarah-Judith Breton, Ève Cloutier, Marjorie Daigle, Charles Delisle-Thibeault, Panagiota Giannakouros, Stéphanie Grenier, Gabrielle Guilbault, Caroline Léger, Catherine Ouellet, Marie-Claude Tremblay (Research Coordinators); Élisabeth Gagne, Julie Gaudreau, Claire Grégoire, Véronique Labbé, Ariane Laprise-Rochette, Caroline Ouellet, Mélanie Samson, Marie-David Simoneau, Virginie Turcotte, Tuong-Vi Tran (Pharmacy).

### **Ottawa Civic Hospital, Ottawa, ON**

Dr Lauralyn McIntyre (Lead) Dr Joe Pagilarello (Co-Investigator); Pierre Cardinal, Gianni D'Egidio, Shane English, Mike Hartwick, Jonathon Hooper, Gwynne Jones, John Kim, Dal Kubelik, Kwadwo Kyeremanteng, Hilary Meggison, Sherissa Microys, Dave Neiliovitz, Guiseppe Pagliarello, Rakesh Patel, Jo Po, Peter Reardon, Erin Rosenberg, Aimee Sarti, Andrew Seely (Co-

Investigators); Shelley Acres, Brigitte Gomes, Heather Langlois, Liane Leclair, Sydney Mieзитis, Kaitlyn Montroy, Rebecca Porteous, Shawna Reddie, Irene Watpool (Research Coordinators); Wendy Aikens, Marianne Cox, Ann-Marie Dugal, Susan Fetzer, Kathy Fraser, Jennifer Kuhn, Rob MacLeod, Susanne Richard, Dawn Rose, Sherry Weir (Pharmacy).

#### **Ottawa General Hospital, Ottawa, ON**

Dr Lauralyn McIntyre (Lead), Dr Pierre Cardinal, Dr Gianni D'Egidio, Dr Shane English, Dr Mike Hartwick, Dr Jonathon Hooper, Dr Gwynne Jones, Dr John Kim, Dr Dal Kubelik, Dr Kwadwo Kyeremanteng, Dr Hilary Meggison, Dr Sherissa Microys, Dr Dave Neiliovitz, Dr Guiseppe Pagliarello, Dr Rakesh Patel, Dr Jo Po, Dr Peter Reardon, Dr Erin Rosenberg, Dr Aimee Sarti, Dr Andrew Seely (Co-Investigators); Shelley Acres, Heather Langlois, Liane Leclair, Sydney Mieзитis, Kaitlyn Montroy, Rebecca Porteous, Shawna Reddie, Amanda Van Beinum, Allyshia Van Tol, Irene Watpool (Research Coordinators); Wendy Aikens, Anne-Marie Dugal, Susan Fetzer, Sherry Weir (Pharmacy).

#### **Vancouver General Hospital, Vancouver, BC**

Dr Bill Henderson (Lead), Dr Donald Griesdale, Dr Mypinder Sekhon (Co-Investigators); Denise Foster, Suzie Logie (Research Coordinators); Judy Yip (Pharmacy).

#### **University Health Network, Toronto Western Hospital, Toronto, ON**

Dr Margaret Herridge (Lead), Drs Alberto Goffi, Dr Eyal Golan, Dr John Granton, Dr Victoria McCredie, Dr Elizabeth Wilcox (Co-Investigators); Jaimie Archer, Daniel Chen, Paulina Farias, Brooke Fraser, Cheryl Geen-Smith, Barbara Kosky, Andrea Matte, Christina Pugliese, Priscila Robles, Lia Stenyk, Cristian Urrea, Karolina Walczak (Research Coordinators); Kyung Ae, Jane Ascroft, Fatima Haji, Rajvinder Kaur, Jane Lui, Sophia Mateo, Nga Pham, Tam Pham, Matthew Suen, Jennifer Teng (Pharmacy).

#### **Vancouver Island Health Authority, Vancouver, BC**

Dr Gordon Wood (Lead), Dr Daniel Ovakim (Co-Investigator); Fiona Auld, Gayle Camey, Ralph Fleming, Jennifer Good, Mandeep Manhas (Research Coordinators); Karin Boyd, Jane Dheere (Pharmacy).

#### **Toronto General Hospital, Toronto, ON**

Dr Margaret Herridge (Lead), Dr Eyal Golan, Dr John Granton, (Co-Investigators); Jaimie Archer, Daniel Chen, Brooke Fraser, Cheryl Geen-Smith, Andrea Matte, Priscilia Robles, Cristian Urrea (Research Coordinators); Jane Ascroft, Fatima Haji, Jie Meng, Matthew Suen, Muhammad Walid, Jill Westlund (Pharmacy).

#### **Centre intégré universitaire de santé et de services sociaux du Nord-de-l'Île-de-Montréal (Hôpital du Sacré-Cœur de Montréal), Montréal, QC**

Dr Emmanuel Charbonney (Lead) Dr Yoan Lamarche, Dr Soazig Leguillan, Dr Karim Serri, Dr Colin Verdant, Dr Yanick Beaulieu, Dr Patrick Bellemare, Dr Philippe Bernard, Dr Marc Giasson, Dr Véronique Brunette, Dr Alexandros Cavayas, Dr Émilie Lévesque, (Co-Investigators); Halina Labikova, Julia Lainer Palacios, Marie-Ève Langlois, Virginie Williams (Research Coordinators); Thuy Anh Nguyen, Valérie Phaneuf, David Williamson (Pharmacy).

#### **Centre intégré universitaire de santé et de services sociaux de l'Estrie - Centre hospitalier universitaire de Sherbrooke, Sherbrooke, QC**

Dr François Lamontagne (Lead), Dr Frédéric D'Aragnon, Dr Charles St-Arnaud, Dr Hector Quiroz (Co-Investigator); Virginie Bolduc, Elaine Carbonneau, Joannie Marchand, Marie-Hélène Masse



(Research Coordinators); Sylvie Cloutier, Marianne Guay, Line Morin, Jessie Nicolson, Isabelle Paquette, Patricia Roy, France Théberge (Pharmacy).

**McGill University Health Centre (Royal Victoria Hospital, Glen Site), Montréal, QC**

Dr Arnold S. Kristof (Lead), Dr Peter Goldberg, Dr Roupen Hatzakorzian, Dr Sheldon Magder, Dr Jason Shahin, Dr Salman Qureshi (Co-Investigators); Josie Campisi (Research Coordinator); Vasilica Botan, Anissa Capilnean, Alyssa Corey, Annick Gagné, Jasmine Mian, Kathleen Normandin (Pharmacy).

**McGill University Health Centre (Montréal General Hospital), Montréal, QC**

Dr Kosar Khwaja (Lead), Dr Dan Deckelbaum, Dr Jeremy Grushka, Dr Ash Gursahaney, Dr David Hornstein, Dr Dev Jayaraman, Dr Tarek Razek, Dr Robert Salasidis, Dr Patrizia Zanelli (Co-Investigators); Norine Alam, Laura Garcia (Research Coordinators); Tonia Doerksen, Ariane Lessard, Gilbert Matte, Marie-France Robert (Pharmacy).

**Centre hospitalier de l'Université de Montréal, Montréal, QC**

Dr Martin Girard (Lead); Dr Pierre Aslanian, Dr Sylvain Belisle, Dr François-Martin Carrier, Dr Michaël Chassé, Dr André Denault, Dr Jean-Gilles Guimond, Dr Antoine Halwagi, Dr Paul Hébert, Dr Christopher Kolan, Dr Jordi Mancebo, Dr Nicholas Robillard (Site Co-Investigator); Fatna Benettaib, Dounia Boumahni, Casey Bourdeau Caporuscio, Marie-Ève Cantin, Virginy Côté-Gravel, Ali Ghamraoui, Martine Lebrasseur, Lancelot Legendre Courville, Stéphanie Lorio, Maria Trinidad Madrid, Nicole Poitras, Romain Rigal, Maya Salame, Valérie Tran (Research Coordinators); Katie Bacon, Nathalie Boudreau, Cecilia Carvajal, Lyne Gauthier, Julie Gendron, Karine Jean, Louise Laforest, Antonietta Lembo, Sothun Lim, Jennifer Morrissette, France Pagé, Lucie Pelletier, Marie-Christine Rodrigue (Pharmacy).

**Royal Alexandra, Edmonton, AB**

Dr Jim Kutsiogiannis (Lead), Dr Raiyan Chowdhury, Dr Jon Davidow, Dr Curt Johnston, Dr Richard Johnston, Dr Kim Macala, Dr Sam Marcushamer, Dr Darren Markland, Dr Doug Matheson, Dr Damian Paton-Gay, Dr David Zygun (Co-Investigators); Nadine Grant, Tayne Hewer, Pat Thompson (Research Coordinators); Maggie Ge, Janny Hall, Sharon Matenchuk (Pharmacy).

**Nova Scotia Health Authority QEII, Halifax, NS**

Dr Osama Loubani (Lead), Dr Rick Hall, Dr Robert Green (Co-Investigators); Diana Gillis, Lisa Julien, Laura Lee Magennis, Tamara Mitterer (Research Coordinators); Joanna Arsenault, Kim Bruce-Payne, Patti Gallant (Pharmacy).

**Kingston General, Kingston, ON**

Dr John Muscedere (Lead), Dr Gord Boyd, Dr Christine D'Arsigny, Dr John Drover, Dr Jason Erb, Dr David Maslove, Dr Chris Parker, Dr Stephanie Sibley (Co-Investigators); Tracy Boyd, Ilinca Georgescu, Miranda Hunt, Danielle Muscedere (Research Coordinators); Cathy Baker, Jennifer Engel, Jennifer Fleming, Lisa Roderick, Shelley Silk, Marcy Spencer, Michelle Tryon (Pharmacy).

**St Boniface Hospital and Health Science Centre, Winnipeg, MB**

Dr Ryan Zarychanski (Lead), Dr Marcus Blouw, Dr Kendiss Olafson, Dr Bojan Paunovic, Dr Heather Smith (Co-Investigators); Oliver Gutieror; Justin Lys, Nicole Marten, Sherri Lynn Wingfield (Research Coordinators); Marnie Boyle, Halyna Ferens, Debbie Hrabi, Beata Kozak, Chantal MacDonald, Julie Muisse (Pharmacy).

**London Health Sciences Centre- Victoria Hospital, London, ON**

1  
2  
3 Dr Ian Ball (Lead); Eileen Campbell, Susie Imerovski, Athena Ovsenek, Rebecca Rondinelli  
4 (Research Coordinators); Teresa Longfield, Amy Moyer, Faith Norris, Janice Sumpton, Karina  
5 Teterycz (Pharmacy).  
6

7 **Brantford General Hospital, Brantford, ON**

8 Dr Brenda Reeve (Lead); Karen Bento, Megan Davis, Will Dechert, Krista Gallo, Barbara Longo,  
9 Courtney Mullen, Elysia Skrzypek, Laurenne Wierenga (Research Coordinators); Wesam  
10 Abuzaiter, Lynda Amorim, Rosemarie Bauer, Rachel Damota, Thoa Ho, Nicole Macdougall, Mary  
11 Thornewell, Lara Pe, Jennifer Visocchi (Pharmacy).  
12

13 **Health Sciences Centre, Winnipeg, MB**

14 Dr Ryan Zarychanski (Lead), Dr Bojan Paunovic (Co-Investigator); Justin Lys, Nicole Marten  
15 (Research Coordinators); Audrey Bhairo, Halyna Ferenes, Beata Kozak, Debra Kubin, Dawn-Lee  
16 McLaughlin, Maria Valente (Pharmacy).  
17

18 **St Joseph's Hospital, Toronto, ON**

19 Dr Rob Cirone (Lead), Dr Jennie Johnstone (Co-Investigator); Kanthi Kavikondala, Axelle Pellerin,  
20 Laura Tomat (Research Coordinators); Jeff Carter, Jiten Jani, Brendan Yeats (Pharmacy).  
21  
22

23 **Royal Columbia Hospital, New Westminster, BC**

24 Dr Steve Reynolds (Lead); Suzette Willems (Research Coordinator); Tina Sekhon (Pharmacy).  
25

26 **William Osler Hospital, McKenzie Health, Brampton Civic Hospital Brampton, ON**

27 Dr Sebastien Trop (Lead), Dr Alexandra Binnie, Dr Ronald Heslegrave, (Co-Investigator); Kim  
28 Sharman, Zaynab Panchbhaya (Research Coordinators); Rakhi Goel, Kim Kozluk, Julianne  
29 Labelle, Hina Marsonia, Cecillia Scott (Pharmacy).  
30

31 **London Health Sciences Centre –University Hospital, London, ON**

32 Dr Dave Nagpal (Lead), Dr Ian Ball (Co-Investigator); Tracey Bentall, Jessica Sturt-Smith  
33 (Research Coordinators); Michelle Alexander, Tammy Ellis, Mindy Muylaert, Cindy Paczkowski  
34 (Pharmacy).  
35

36 **University of Alberta, Edmonton, AB**

37 Dr Wendy Sligl (Lead), Dr Sean Bagshaw (Co-Investigator); Nadia Baig, Lorena McCoshen  
38 (Research Coordinators); Katrina Alexandropoulos, Sherri Bain, Michelle Brandt, Cathy  
39 Constable, Kari Douglas, Shaleen Maharaj, Sabrina Travers (Pharmacy).  
40  
41

42 **Foothills Hospital, University of Calgary, Calgary, AB**

43 Dr Tom Stelfox (Lead), Dr Philippe Couillard, Dr. Christopher Doig, Dr Ken Parhar (Co-  
44 Investigators); Joshua Booth, Cassidy Codan, Stacy Ruddell (Research Coordinators); Candice  
45 Cameron, Rhonda Edison, Anne Martin, Breanna Mina (Pharmacy).  
46

47 **Peter Lougheed, University of Calgary, Calgary, AB**

48 Dr Dan Niven (Lead), Dr Luc Berthiaume, Dr Jonathan Gaudet (Co-Investigators); Joshua Booth,  
49 Cassidy Codan, Gina Fleming, Katie Ross, Stacy Ruddell (Research Coordinators); Candice  
50 Cameron, Rhonda Edison, Anne Martin, Breanna Mina (Pharmacy).  
51

52 **Niagara Health, St Catharines, ON**

53 Dr Jennifer Ly Tsang (Lead), Dr Erick Duan (Co-Investigator); Mercedes Carmargo, Beverly  
54 Hoekstra (Research Coordinators); Rita Caporuscio, Rachel Kressner Falvo, Dimitra Fleming,  
55 Carmelina Maxwell, Karmen Plantic (Pharmacy).  
56  
57

1  
2  
3  
4 **Centre intégré universitaire de santé et de services sociaux de l'Est-de-l'Île-de-Montréal**  
5 **(Hôpital Maisonneuve-Rosemont), Montréal, QC**

6 Dr François Marquis (Lead) Dr Han Tin Wang, Dr Francis Toupin, Dr Stephane Ahern, Dr Brian  
7 Laufer, Dr Marc Brosseau (Co-Investigators); Pauline Dul, Johanne Harvey, Lotthida  
8 Inthanavong, Danae Tassy (Research Coordinators); Helen Assayag, Maude Bachand, Marysa  
9 Betournay, Karine Daoust, Kristine Goyette, Ariane Lessard, Marceline Quach (Pharmacy).

11  
12 **Grand River Hospital, Kitchener, ON**

13 Dr Paul Hosek (Lead), Dr Bill Plaxton (Co-Investigator); Catherine Armstrong, Rhonda Barber,  
14 William Dechert, Janelle Ellis, Kayla Fisk, Melissa Gabnouri, Emilie Gordon, Rebecca Haegens,  
15 Lisa Halford, Brooklynn Hillis, Rebecca Jesso, Jenn McLaren, Elliot McMillan, Mariska Pelkmans,  
16 Matthew Rekman, Sylvia Sinkovitis, Monica Truong, Michelle White (Research Coordinators);  
17 Noah Bates, Susan Bryden-Cromwell, Lisa Cha, Colleen Cameron, Aminah Deen, Sheri  
18 DiGiovanni, Anders Foss, Esther Lee, Heidi MacGregor, Esther Galbraith Robyn McArthur, Julie  
19 McGregor, Keith Miller, Sharon Morris, Shelley Parker, Candice Smith, Joanna Stoglow, Jennifer  
20 Tung, Melissa Vos (Pharmacy).

22  
23 **Sunnybrook Health Sciences Centre, Toronto, ON**

24 Dr Neill Adhikari (Lead), Dr Andre Amaral, Dr Andre Carlos, Dr Brian Cuthbertson, Dr Rob Fowler,  
25 Dr Damon Scales (Co-Investigators);  
26 Navjot Kaur, Nicole Marinoff, Adic Perez, Jane Wang (Research Coordinators); Katrina  
27 Hatzifilalithis, John Iazzetta, Chrys Kolos, Ingrid Quinton (Pharmacy).

28  
29 **Joseph Brant Hospital, Burlington, ON**

30 Dr Paul Lysecki (Lead), Dr Joseph Berlingieri, Dr Sameer Shaikh, Dr Steven Skitch (Co-  
31 Investigators); Tracy Campbell (Research Coordinator); Hala Basheer, Kathy Bruder, Jane  
32 Cheng, Kaiser Qureshi, Celeste Thibault (Pharmacy).

33  
34 **Institut Universitaire de Cardiologie et de Pneumologie de Québec, Québec, QC**

35 Dr François Lellouche (Lead), Dr Ying Tung Sia, Dr Mathieu Simon (Co-Investigators); Pierre-  
36 Alexandre Bouchard, Patricia Lizotte (Research Coordinators); Nathalie Chateauvert, Thérèse  
37 Grenier (Pharmacy).

38  
39 **Centre intégré de santé et de services sociaux de Chaudière-Appalaches (L'Hôtel-Dieu de**  
40 **Lévis), Lévis, QC**

41 Dr Patrick Archambault (Lead), Dr Jean-François Bellemare, Dr Simon Bordeleau, Dr Christine  
42 Drouin, Dr Benoît Duhaime, Dr Ann Laberge, Dr Philippe Lachance (Co-Investigators); Mélanie  
43 Constantin, Estel Deblois, Maude Dionne, Lise Lavoie, Isabelle Michel, Alexandre Pépin,  
44 Sandrine Poulin (Research Coordinators); Sarah Anctil, Amélie Chouinard, Louis-Étienne  
45 Marchand, Robin Roy (Pharmacy).

46  
47 **USA**

48  
49 **Mayo Clinic, Rochester, MN**

50 Dr Rodrigo Cartin-Ceba (Lead), Dr Richard Oeckler (Co-Investigator); Brenda Anderson, Lavonne  
51 Liedl, Laurie Meade, Sueanne Weist (Research Coordinators); Anna Bartoo, Debbie Bauer, Vince  
52 Brickley, Shaun Bridges, Greg Brunn, Jennifer Eickstaedt, Jill Randolph, Sandy Showalter, Erin  
53 Stern, Melissa Wendling (Pharmacy).

**St John's Mercy Medical Center, St Louis, MO**

Dr Robert Taylor (Lead); Margaret Cytron, Kim Fowler, Katie Krause, Jackie O'Brien, Marianne Tow (Research Coordinators); John Ma, Kaitlin Stassi (Pharmacy).

**Saudi Arabia****King Abdulaziz Medical Center, Riyadh, Saudi Arabia**

Dr Yaseen Arabi (Lead), Dr Abdulaziz Al-Dawood, Dr Haytham Tlayjeh, Dr Alaaeldien Ghanem, Dr Ahmad Hassanien, Dr. Mohamed Hegazy, Dr. Ashraf El Sharkawi (Co-Investigators); Felwa Bin Humaid, Hala Alanizi, Nadyah Alanizy, Njoud Al Bogami, (Research Coordinators); Dr Mohammed Muhaidib, Dr Jawaher Gramish, Randa Alsomali, Nora Devera, Marjane Villafranca (Pharmacy).

**Abbreviations**


---

AAD = antibiotic-associated diarrhea;  
 BCA = bias corrected and accelerated;  
 CEA = Cost-effectiveness analysis;  
 CDAD = *Clostridioides* Difficile associated diarrhea;  
 CHEERS = Consolidated Health Economic Evaluation Reporting Standards  
 CI = confidence interval;  
 CIHR = Canadian Institute of Health Research;  
 CFU = colony-forming unit;  
 CT = computed tomography;  
 DOT = days of therapy;  
 DDD = defined daily dose;  
 ECMO = extracorporeal membrane oxygenation;  
 GBP = Great Britain Pound;  
 ICER = incremental cost-efficacy/effectiveness ratio;  
 ICU = intensive care unit;  
 OR = odds ratio;  
 QALY = quality-adjusted life-year  
 PCR = polymerase chain reaction;  
 PPP: purchase power parity  
 PROSPECT =Probiotics: Prevention of Severe Pneumonia and Endotracheal Colonization Trial;  
 RCT = randomized control trial;  
 SAE = serious adverse events;  
 SAS = Statistical analysis software;  
 US = United States;  
 V-A = veno-arterial;  
 V-V = veno-venous;  
 VAC = vacuum-assisted closure;  
 VAP = ventilator-associated pneumonia;  
 WHO = World Health Organization;

**Footnotes****Conflicts of interests**

The authors declare that they have no competing interests.

**Authors contributions**

Conception and design: VL, DJC, BR, FX, JJ, RF.

Manuscript writing: VL, DJC, BR, FX, JJ, RF.

Critical revision and final approval of the manuscript: VL, DJC, BR, FX, JJ, RF, JB, FL, JM, LT, DHA.

Obtained funding: DJC, JJ, FL, JM, LT.

Administrative, technical or material support: FX, BR, DJC, JJ, DHA, LT.

Study supervision: VL, DJC, BR, FX, JJ, RF.

All authors read and approved the final manuscript.

Go to:

Contributor Information

---

Vincent Lau, Email: [vinceissaclau@gmail.com](mailto:vinceissaclau@gmail.com)

Deborah Cook, Email: [debcook@mcmaster.ca](mailto:debcook@mcmaster.ca)

Bram Rochweg, Email: [rochweg@mcmaster.ca](mailto:rochweg@mcmaster.ca)

Feng Xie, Email: [fengxie@mcmaster.ca](mailto:fengxie@mcmaster.ca)

Jennie Johnstone, Email: [jennie.johnstone@oahpp.ca](mailto:jennie.johnstone@oahpp.ca)

Robert Fowler, Email: [Rob.Fowler@sunnybrook.ca](mailto:Rob.Fowler@sunnybrook.ca)

John C. Marshall, Email: [John.Marshall@unityhealth.to](mailto:John.Marshall@unityhealth.to)

François Lauzier, Email: [Francois.Lauzier@fmed.ulaval.ca](mailto:Francois.Lauzier@fmed.ulaval.ca)

John Basmaji, Email: [jbasmaji2013@gmail.com](mailto:jbasmaji2013@gmail.com)

Diane Heels-Ansdell, Email: [ansdell@mcmaster.ca](mailto:ansdell@mcmaster.ca)

Lehana Thabane, Email: [ThabanL@mcmaster.ca](mailto:ThabanL@mcmaster.ca)

## References:

- 1 Muscedere JG, Martin CM, Heyland DK. The impact of ventilator-associated pneumonia on the Canadian health care system. *J Crit Care* 2008;**23**:5–10. doi:10.1016/j.jcrc.2007.11.012
- 2 Safdar N, Dezfulian C, Collard HR, *et al*. Clinical and economic consequences of ventilator-associated pneumonia: a systematic review. *Crit Care Med* 2005;**33**:2184–93.
- 3 Muscedere J, Sinuff T, Heyland DK, *et al*. The clinical impact and preventability of ventilator-associated conditions in critically ill patients who are mechanically ventilated. *Chest* 2013;**144**:1453–60. doi:10.1378/chest.13-0853
- 4 Muscedere J, Dodek P, Keenan S, *et al*. Comprehensive evidence-based clinical practice guidelines for ventilator-associated pneumonia: prevention. *J Crit Care* 2008;**23**:126–37. doi:10.1016/j.jcrc.2007.11.014
- 5 Food and Agriculture Organization, of the United Nations & World Health Organization. Joint FAO/WHO Working Group Report on Drafting Guidelines for the Evaluation of Probiotics in Food. 2002. [https://www.who.int/foodsafety/fs\\_management/en/probiotic\\_guidelines.pdf](https://www.who.int/foodsafety/fs_management/en/probiotic_guidelines.pdf) (accessed 23 Nov 2019).
- 6 WHO | Diarrhoea. WHO. <http://www.who.int/topics/diarrhoea/en/> (accessed 17 Mar 2019).
- 7 Marshall JC. Gastrointestinal flora and its alterations in critical illness. *Curr Opin Clin Nutr Metab Care* 1999;**2**:405–11.
- 8 Stappenbeck TS, Hooper LV, Gordon JI. Developmental regulation of intestinal angiogenesis by indigenous microbes via Paneth cells. *Proc Natl Acad Sci U S A* 2002;**99**:15451–5. doi:10.1073/pnas.202604299
- 9 Tanoue T, Honda K. Induction of Treg cells in the mouse colonic mucosa: a central mechanism to maintain host-microbiota homeostasis. *Semin Immunol* 2012;**24**:50–7. doi:10.1016/j.smim.2011.11.009
- 10 Brenchley JM, Douek DC. Microbial translocation across the GI tract. *Annu Rev Immunol* 2012;**30**:149–73. doi:10.1146/annurev-immunol-020711-075001
- 11 Hao Q, Lu Z, Dong BR, *et al*. Probiotics for preventing acute upper respiratory tract infections. *Cochrane Database Syst Rev* 2011;:CD006895. doi:10.1002/14651858.CD006895.pub2
- 12 Hempel S, Newberry SJ, Maher AR, *et al*. Probiotics for the prevention and treatment of antibiotic-associated diarrhea: a systematic review and meta-analysis. *JAMA* 2012;**307**:1959–69. doi:10.1001/jama.2012.3507
- 13 Ritchie ML, Romanuk TN. A meta-analysis of probiotic efficacy for gastrointestinal diseases. *PloS One* 2012;**7**:e34938. doi:10.1371/journal.pone.0034938
- 14 Johnson S, Maziade P-J, McFarland LV, *et al*. Is primary prevention of Clostridium difficile infection possible with specific probiotics? *Int J Infect Dis IJID Off Publ Int Soc Infect Dis* 2012;**16**:e786-792. doi:10.1016/j.ijid.2012.06.005

- 15 Manzanares W, Lemieux M, Langlois PL, *et al.* Probiotic and synbiotic therapy in critical illness: a systematic review and meta-analysis. *Crit Care Lond Engl* 2016;**19**:262. doi:10.1186/s13054-016-1434-y
- 16 Goldenberg JZ, Yap C, Lytvyn L, *et al.* Probiotics for the prevention of Clostridium difficile-associated diarrhea in adults and children. *Cochrane Database Syst Rev* 2017;**12**:CD006095. doi:10.1002/14651858.CD006095.pub4
- 17 Lau VI, Rochweg B, Xie F, *et al.* Probiotics in hospitalized adult patients: a systematic review of economic evaluations. *Can J Anesth Can Anesth* Published Online First: 12 November 2019. doi:10.1007/s12630-019-01525-2
- 18 Cook DJ, Johnstone J, Marshall JC, *et al.* Probiotics: Prevention of Severe Pneumonia and Endotracheal Colonization Trial-PROSPECT: a pilot trial. *Trials* 2016;**17**:377. doi:10.1186/s13063-016-1495-x
- 19 Johnstone J, Meade M, Marshall J, *et al.* Probiotics: Prevention of Severe Pneumonia and Endotracheal Colonization Trial-PROSPECT: protocol for a feasibility randomized pilot trial. *Pilot Feasibility Stud* 2015;**1**:19. doi:10.1186/s40814-015-0013-3
- 20 Johnstone J, Heels-Ansdell D, Thabane L, *et al.* Evaluating probiotics for the prevention of ventilator-associated pneumonia: a randomised placebo-controlled multicentre trial protocol and statistical analysis plan for PROSPECT. *BMJ Open* 2019;**9**:e025228. doi:10.1136/bmjopen-2018-025228
- 21 Drummond MF, Sculpher MJ, Claxton K, *et al.* *Methods for the Economic Evaluation of Health Care Programmes*. Oxford University Press 2015.
- 22 Sanders GD, Neumann PJ, Basu A, *et al.* Recommendations for Conduct, Methodological Practices, and Reporting of Cost-effectiveness Analyses: Second Panel on Cost-Effectiveness in Health and Medicine. *JAMA* 2016;**316**:1093–103. doi:10.1001/jama.2016.12195
- 23 Husereau D, Drummond M, Petrou S, *et al.* Consolidated Health Economic Evaluation Reporting Standards (CHEERS) statement. *BMJ* 2013;**346**:f1049. doi:10.1136/bmj.f1049
- 24 Polk RE, Fox C, Mahoney A, *et al.* Measurement of adult antibacterial drug use in 130 US hospitals: comparison of defined daily dose and days of therapy. *Clin Infect Dis Off Publ Infect Dis Soc Am* 2007;**44**:664–70. doi:10.1086/511640
- 25 Kuster SP, Ruef C, Ledergerber B, *et al.* Quantitative antibiotic use in hospitals: comparison of measurements, literature review, and recommendations for a standard of reporting. *Infection* 2008;**36**:549–59. doi:10.1007/s15010-008-7462-z
- 26 Little RJA, Rubin DB. *Statistical Analysis with Missing Data*. New York, NY, USA: : John Wiley & Sons, Inc. 1986.
- 27 Zhang Y, Alyass A, Vanniyasingam T, *et al.* A systematic survey of the methods literature on the reporting quality and optimal methods of handling participants with missing outcome data for continuous outcomes in randomized controlled trials. *J Clin Epidemiol* 2017;**88**:67–80. doi:10.1016/j.jclinepi.2017.05.016

- 1  
2  
3 28 Fowler RA, Mittmann N, Geerts WH, *et al*. Economic evaluation of the prophylaxis for  
4 thromboembolism in critical care trial (E-PROTECT): study protocol for a randomized  
5 controlled trial. *Trials* 2014;**15**:502. doi:10.1186/1745-6215-15-502  
6  
7 29 Bank of Canada Inflation Calculator. [https://www.bankofcanada.ca/rates/related/inflation-](https://www.bankofcanada.ca/rates/related/inflation-calculator/)  
8 [calculator/](https://www.bankofcanada.ca/rates/related/inflation-calculator/) (accessed 12 Apr 2019).  
9  
10 30 Official exchange rate (LCU per US\$, period average) | Data.  
11 <https://data.worldbank.org/indicator/PA.NUS.FCRF> (accessed 11 Feb 2019).  
12  
13 31 Currency Converter | Foreign Exchange Rates | OANDA.  
14 <https://www.oanda.com/currency/converter/> (accessed 23 Mar 2019).  
15  
16 32 Tukiainen M. RatesFX - Daily foreign exchange rates, information about currencies and  
17 currency markets. Published Online First: 11 February 2019. <https://www.ratesfx.com/>  
18 (accessed 11 Feb 2019).  
19  
20 33 Ng R, Hasan B, Mittmann N, *et al*. Economic analysis of NCIC CTG JBR.10: a randomized  
21 trial of adjuvant vinorelbine plus cisplatin compared with observation in early stage non-  
22 small-cell lung cancer--a report of the Working Group on Economic Analysis, and the Lung  
23 Disease Site Group, National Cancer Institute of Canada Clinical Trials Group. *J Clin Oncol*  
24 *Off J Am Soc Clin Oncol* 2007;**25**:2256–61. doi:10.1200/JCO.2006.09.4342  
25  
26 34 Patel PJ, Singh SK, Panaich S, *et al*. The aging gut and the role of prebiotics, probiotics,  
27 and synbiotics: A review. *J Clin Gerontol Geriatr* 2014;**5**:3–6. doi:10.1016/j.jcgg.2013.08.003  
28  
29 35 Wachholz PA, Boas PJFV, dos Santos Nunes V, *et al*. Evidence on the role of prebiotics,  
30 probiotics, and synbiotics in gut health and disease prevention in the elderly. *J Clin Gerontol*  
31 *Geriatr*;**5**:1–2.  
32  
33 36 Bagshaw SM, Stelfox HT, McDermid RC, *et al*. Association between frailty and short- and  
34 long-term outcomes among critically ill patients: a multicentre prospective cohort study.  
35 *CMAJ* 2014;**186**:E95–102. doi:10.1503/cmaj.130639  
36  
37 37 Fieller EC. Some Problems in Interval Estimation. *J R Stat Soc Ser B Methodol*  
38 1954;**16**:175–85.  
39  
40 38 Doubilet P, Begg CB, Weinstein MC, *et al*. Probabilistic sensitivity analysis using Monte  
41 Carlo simulation. A practical approach. *Med Decis Mak Int J Soc Med Decis Mak*  
42 1985;**5**:157–77. doi:10.1177/0272989X8500500205  
43  
44 39 Wilcox ME, Vaughan K, Chong CAKY, *et al*. Cost-Effectiveness Studies in the ICU: A  
45 Systematic Review. *Crit Care Med* 2019;**Online First**.  
46 doi:10.1097/CCM.00000000000003768  
47  
48 40 Fowler RA, Mittmann N, Geerts W, *et al*. Cost-effectiveness of Dalteparin vs Unfractionated  
49 Heparin for the Prevention of Venous Thromboembolism in Critically Ill Patients. *JAMA*  
50 2014;**312**:2135–45. doi:10.1001/jama.2014.15101  
51  
52  
53  
54  
55  
56  
57  
58  
59  
60



- 1  
2  
3 41 Lenoir-Wijnkoop I, Nuijten MJC, Craig J, *et al*. Nutrition economic evaluation of a probiotic in  
4 the prevention of antibiotic-associated diarrhea. *Front Pharmacol* 2014;**5**:13.  
5 doi:10.3389/fphar.2014.00013  
6  
7 42 Vermeersch SJ, Vandenplas Y, Tanghe A, *et al*. Economic evaluation of *S. boulardii* CNCM  
8 I-745 for prevention of antibiotic-associated diarrhoea in hospitalized patients. *Acta Gastro-*  
9 *Enterol Belg* 2018;**81**:269–76.  
10  
11 43 Kerlin MP, Cooke CR. Understanding Costs When Seeking Value in Critical Care. *Ann Am*  
12 *Thorac Soc* 2015;**12**:1743–4. doi:10.1513/AnnalsATS.201510-660ED  
13  
14 44 Krahn M, Bryan S, Lee K, *et al*. Embracing the science of value in health. *CMAJ*  
15 2019;**191**:E733–6. doi:10.1503/cmaj.181606  
16  
17 45 Vijayaraghavan BKT, Willaert X, Cuthbertson BH. Cost-effectiveness analysis should be  
18 mandatory in clinical-effectiveness research. *CMAJ* 2019;**191**:E1140–E1140.  
19 doi:10.1503/cmaj.73298  
20  
21  
22  
23  
24  
25  
26  
27  
28  
29  
30  
31  
32  
33  
34  
35  
36  
37  
38  
39  
40  
41  
42  
43  
44  
45  
46  
47  
48  
49  
50  
51  
52  
53  
54  
55  
56  
57  
58  
59  
60

## Tables

Table 1: Summary of economic evaluation framework

|                               |                                                                                                                                                                                                                                                                                                   |
|-------------------------------|---------------------------------------------------------------------------------------------------------------------------------------------------------------------------------------------------------------------------------------------------------------------------------------------------|
| <b>Question:</b>              | Is the use of probiotics as compared to standard care without probiotics cost-effective for the prevention of VAP and other clinically important outcomes in critically ill medical-surgical patients in PROSPECT?                                                                                |
| <b>Perspective:</b>           | Public payer (in-hospital costs)                                                                                                                                                                                                                                                                  |
| <b>Setting:</b>               | Ventilated ICU patients (44 centers, 3 countries: 41 Canada, 2 USA, 1 Saudi Arabia)                                                                                                                                                                                                               |
| <b>Comparators:</b>           | Probiotics ( <i>Lactobacillus rhamnosus</i> GG) with standard of care versus standard care without probiotics                                                                                                                                                                                     |
| <b>Time Horizon:</b>          | From ICU participant admission to hospital discharge/death (non-fixed time span)                                                                                                                                                                                                                  |
| <b>Discount Rate:</b>         | No discounting (no long term follow-up over 1 year)                                                                                                                                                                                                                                               |
| <b>Clinical Outcomes:</b>     | VAP, CDAD, AAD, length of stay and mortality (ICU and hospital)                                                                                                                                                                                                                                   |
| <b>Costs:</b>                 | Direct medical costs associated with treatment and complications (ICU and ward costs, personnel, medications, laboratory tests, diagnostic testing and procedures/surgeries)                                                                                                                      |
| <b>Evaluation:</b>            | Primary outcome: Incremental cost-efficacy ratios (ICERs) per in-hospital VAP event avoided<br>Secondary outcomes: ICERs for other clinically important outcomes:<br>(i.) Incremental cost per CDAD avoided<br>(ii.) Incremental cost per AAD avoided<br>(iv.) Incremental cost per death avoided |
| <b>Currency (price date):</b> | United States Dollars (2019)                                                                                                                                                                                                                                                                      |
| <b>Uncertainty:</b>           | Non-parametric bootstrapping to produce confidence intervals (probabilistic sensitivity analysis)<br>Cost sampling from various hospitals (stratified by: location)<br>Sensitivity analyses to deal with structural and methodological uncertainty                                                |

AAD = antibiotic associated diarrhea; CDAD = *Clostridioides difficile* associated diarrhea; ICER = incremental cost-efficacy/effectiveness ratio; ICU = intensive care unit; PROSPECT = Probiotics: Prevention of Severe Pneumonia and Endotracheal Colonization Trial; US = United States; VAP = ventilator-associated pneumonia;

1  
2  
3  
4  
5  
6  
7  
8  
9  
10  
11  
12  
13  
14  
15  
16  
17  
18  
19  
20  
21  
22  
23  
24  
25  
26  
27  
28  
29  
30  
31  
32  
33  
34  
35  
36  
37  
38  
39  
40  
41  
42  
43  
44  
45  
46  
47  
48  
49  
50  
51  
52  
53  
54  
55  
56  
57  
58  
59  
60

Supplemental Table 1: Definitions of clinical outcomes

Supplemental Table 2: Healthcare resource utilization and unit costs (per jurisdiction)

Supplemental Table 3: Health economic evaluation assumptions

Supplemental Table 4: E-PROSPECT Costing Manual

Supplemental Table 5: CHEERS Checklist

For peer review only

1  
2  
3  
4  
5  
6  
7  
8  
9  
10  
11  
12  
13  
14  
15  
16  
17  
18  
19  
20  
21  
22  
23  
24  
25  
26  
27  
28  
29  
30  
31  
32  
33  
34  
35  
36  
37  
38  
39  
40  
41  
42  
43  
44  
45  
46  
47  
48  
49  
50  
51  
52  
53  
54  
55  
56  
57  
58  
59  
60

For peer review only

Supplemental Table 1: Definitions of clinical outcomes

| Clinical Outcome                             | Definition                                                                                                                                                                                                                                                                                                                                                                                                                                                                                                                                                                                                                                                                                                          | Source/Rationale                                                                                                                                                                                                                                                                                                                                                                                                                                                                                                                                                                                                                                                                                            |
|----------------------------------------------|---------------------------------------------------------------------------------------------------------------------------------------------------------------------------------------------------------------------------------------------------------------------------------------------------------------------------------------------------------------------------------------------------------------------------------------------------------------------------------------------------------------------------------------------------------------------------------------------------------------------------------------------------------------------------------------------------------------------|-------------------------------------------------------------------------------------------------------------------------------------------------------------------------------------------------------------------------------------------------------------------------------------------------------------------------------------------------------------------------------------------------------------------------------------------------------------------------------------------------------------------------------------------------------------------------------------------------------------------------------------------------------------------------------------------------------------|
| <u>Ventilator-associated pneumonia (VAP)</u> | <p>The primary outcome is adjudicated VAP. Clinically suspected VAP at participating sites is being centrally adjudicated independently and in duplicate by 2 physicians blinded to allocation and center, informed by the following standardized definition: receiving invasive mechanical ventilation for &gt; 2 days, when there is a new, progressive or persistent radiographic infiltrate on chest radiograph plus any 2 of the following:</p> <ol style="list-style-type: none"> <li>1) fever (temperature &gt;38°C) or hypothermia (temperature &lt;36°C);</li> <li>2) relative leukopenia (&lt;3.0 x 10<sup>6</sup>/L) or leukocytosis (&gt;10 x 10<sup>6</sup>/L);</li> <li>3) purulent sputum</li> </ol> | <p>The American College of Chest Physicians (ACCP) definition did not provide thresholds for leukopenia or leukocytosis. Therefore, the thresholds were obtained from Morrow et al [Morrow] as their VAP definition was also based on the ACCP definition [Grossman]. Any disagreement in adjudication will be resolved through discussion and consensus. Acknowledging that there is no universally accepted gold standard VAP definition [3], and that in non-immunocompromised patients, routine invasive testing is not associated with improved outcomes [Canadian Critical Care Trials Group], we are also collecting data to allow VAP reporting according to several other definitions [46–49].</p> |
| <u>Early VAP</u>                             | Pneumonia arising on day 3, 4 or 5 after the initiation of mechanical ventilation.                                                                                                                                                                                                                                                                                                                                                                                                                                                                                                                                                                                                                                  | <p>We are classifying VAP by early VAP and late VAP, as the etiologic organisms may differ, the antimicrobials prescribed may differ, and the prognosis is often worse for late VAP [50,51]. We will also report a composite outcome of early VAP, late VAP, and post-extubation pneumonia, adjudicated independently and in duplicate by 2 physicians. For the timing of all pneumonia outcomes, we use days rather than hours to inform the classification.</p>                                                                                                                                                                                                                                           |
| <u>Late VAP</u>                              | Late VAP is defined as VAP arising on day 6 of mechanical ventilation or later, and including up to 2 days after                                                                                                                                                                                                                                                                                                                                                                                                                                                                                                                                                                                                    |                                                                                                                                                                                                                                                                                                                                                                                                                                                                                                                                                                                                                                                                                                             |

|                                                            |                                                                                                                                                                                                                                                             |                                                                                                                                                                                                                                                                                                                                                                                                                                                                                                                                                                 |
|------------------------------------------------------------|-------------------------------------------------------------------------------------------------------------------------------------------------------------------------------------------------------------------------------------------------------------|-----------------------------------------------------------------------------------------------------------------------------------------------------------------------------------------------------------------------------------------------------------------------------------------------------------------------------------------------------------------------------------------------------------------------------------------------------------------------------------------------------------------------------------------------------------------|
|                                                            | discontinuation of mechanical ventilation (also relevant for patients with a tracheostomy)                                                                                                                                                                  |                                                                                                                                                                                                                                                                                                                                                                                                                                                                                                                                                                 |
| <u>Post-extubation pneumonia</u>                           | Pneumonia arising in the ICU following discontinuation of mechanical ventilation (3 or more days after discontinuation), labeled post-extubation pneumonia, to avoid suppressing potentially relevant lung infections that arise in ICU                     |                                                                                                                                                                                                                                                                                                                                                                                                                                                                                                                                                                 |
| <u>Diarrhea</u>                                            | Diarrhea in the ICU: <ul style="list-style-type: none"> <li>• World Health Organization definition (<math>\geq 3</math> loose or watery bowel movements per day)</li> <li>• Bristol Stool classification for loose or watery stool (type 6 or 7)</li> </ul> | We will record each bowel movement and define diarrhea incorporating 2 metrics [6,52]                                                                                                                                                                                                                                                                                                                                                                                                                                                                           |
| <u>Clostridioides difficile-associated diarrhea (CDAD)</u> | Clostridioides difficile in the ICU and prior to discharge from hospital: diarrhea (as previously defined) and laboratory confirmation of C. difficile or colonoscopic or histopathologic findings demonstrating pseudomembranous colitis                   | Definition from Cohen et al. [53]. Will be adjudicated independently and in duplicate by 2 physicians                                                                                                                                                                                                                                                                                                                                                                                                                                                           |
| <u>Antibiotic-associated diarrhea (AAD)</u>                | AAD: diarrhea (as above) defined as following the administration of antibiotics, any day antibiotics are administered or within 1 day after starting any antibiotic                                                                                         | Definition from Thibault et al. [54]                                                                                                                                                                                                                                                                                                                                                                                                                                                                                                                            |
| <u>Other healthcare-associated infections</u>              | Any infection acquired during the ICU stay, including bloodstream infection, intravascular catheter-related bloodstream infection, intra-abdominal infection, C. difficile infection, urinary tract infection, skin and soft tissue infection, and others.  | These individual infections are classified using definitions adapted from the International Sepsis Forum Consensus Conference on Definitions of Infection in the Intensive Care Unit [47], as adapted in prior studies [46]. We will also report a composite outcome of any infections (including pneumonia) acquired during the ICU stay. Secondary infectious outcomes (other than pneumonia and C. difficile) are being centrally adjudicated by 1 physician blinded to allocation and center, based on review of data collected at each participating site. |
| <u>Serious adverse events (SAE)</u>                        | Defined as isolation of Lactobacillus spp. in a culture from a sterile site or as the                                                                                                                                                                       | The rationale for our approach to SAEs [Guidance                                                                                                                                                                                                                                                                                                                                                                                                                                                                                                                |

|  |                                                                                                                                                                                                         |                                                                                                                                                                                                                                                                                                                                                                                                                         |
|--|---------------------------------------------------------------------------------------------------------------------------------------------------------------------------------------------------------|-------------------------------------------------------------------------------------------------------------------------------------------------------------------------------------------------------------------------------------------------------------------------------------------------------------------------------------------------------------------------------------------------------------------------|
|  | sole or predominant organism cultured from a non-sterile site and results in:<br>1) persistent or significant disability or incapacity;<br>2) that is life-threatening, or;<br>3) that results in death | Document for Industry] accords with our guidelines for academic drug trials in critical care [55]. Any culture obtained by the ICU team and processed by the clinical microbiology laboratory as positive for Lactobacillus spp. is recorded. Any such bacterial sample is sent to a McMaster University research laboratory for strain genotyping to evaluate consistency with the administered L. rhamnosus GG strain |
|--|---------------------------------------------------------------------------------------------------------------------------------------------------------------------------------------------------------|-------------------------------------------------------------------------------------------------------------------------------------------------------------------------------------------------------------------------------------------------------------------------------------------------------------------------------------------------------------------------------------------------------------------------|

Supplemental Table 2: Healthcare resource utilization and unit costs (per jurisdiction)

| Cost Categories | Natural Units | Unit Cost | Total Cost | Source |
|-----------------|---------------|-----------|------------|--------|
|-----------------|---------------|-----------|------------|--------|

For peer review only



## Study-related drugs

- probiotics (*Lactobacillus rhamnosus GG*) □ antibiotics:
  - piperacillin-tazobactam
  - ceftriaxone
  - ceftazidime
  - azithromycin
  - vancomycin
  - metronidazole
  - levofloxacin
  - imipenem
  - meropenem
  - amoxicillin-clavulin
  - cefuroxime
  - linezolid
  - cefazolin
  - cloxacillin
  - ciprofloxacin
  - gentamicin
  - trimethoprim-sulfamethoxazole
- steroids
  - dexamethasone
  - methylprednisone
  - hydrocortisone
  - prednisone
- stress ulcer prophylaxis
  - cimetidine
  - ranitidine
  - famotidine
  - nizatidine
  - lansoprazole
  - dexlansoprazole
  - pantoprazole
  - esomeprazole
  - omeprazole
  - rabeprazole
- laxatives/motility agents
  - domperidone
  - metoclopramide
  - erythromycin
  - senna
  - dulcolax
  - glytely
  - glycerin
  - lactulose

|                                                                                                                                                                                                                                                                                                                                                                                                                                                                                                         |  |  |  |  |
|---------------------------------------------------------------------------------------------------------------------------------------------------------------------------------------------------------------------------------------------------------------------------------------------------------------------------------------------------------------------------------------------------------------------------------------------------------------------------------------------------------|--|--|--|--|
| <ul style="list-style-type: none"> <li>○ colace ○ citromag ○ PegLyte ○ pancreatic enzymes</li> <li>○ enema</li> <li>□ opiates ○ morphine ○ hydromorphone ○ demerol ○ fentanyl ○ oxycodone ○ percocets</li> </ul>                                                                                                                                                                                                                                                                                        |  |  |  |  |
| <p>Laboratory testing</p> <ul style="list-style-type: none"> <li>• complete blood count</li> <li>• creatinine</li> <li>• arterial blood gas</li> <li>• lactate</li> <li>• albumin</li> <li>• blood cultures</li> <li>• urine cultures</li> <li>• sputum/tracheal aspirate/bronchoalveolar lavage cultures</li> <li>• <i>C. difficile</i> polymerase chain reaction (PCR), toxin assays, ELISA, cell culture, LAMP</li> <li>• other aerobic/anaerobic cultures ○ thoracentesis ○ paracentesis</li> </ul> |  |  |  |  |
| <p>Personnel (<i>per diem or hourly wage</i>)</p> <ul style="list-style-type: none"> <li>• most responsible physician ○ ICU ○ Hospital</li> <li>• consultation physicians</li> <li>• nursing</li> <li>• pharmacist</li> <li>• respiratory therapist</li> <li>• physical therapist</li> <li>• social work</li> <li>• ICU administrative and/or clerical staffing</li> </ul>                                                                                                                              |  |  |  |  |

1  
2  
3  
4  
5  
6  
7  
8  
9  
10  
11  
12  
13  
14  
15  
16  
17  
18  
19  
20  
21  
22  
23  
24  
25  
26  
27  
28  
29  
30  
31  
32  
33  
34  
35  
36  
37  
38  
39  
40  
41  
42  
43  
44  
45  
46  
47  
48  
49  
50  
51  
52  
53  
54  
55  
56  
57  
58  
59  
60

|                                                                                                                                                                                                                      |  |  |  |  |
|----------------------------------------------------------------------------------------------------------------------------------------------------------------------------------------------------------------------|--|--|--|--|
| Radiology <ul style="list-style-type: none"><li>portable chest or abdominal radiographs</li><li>computerized tomography (CT) scan: chest, abdomen, pelvis, sinusitis, head</li><li>MRI: head, chest, joint</li></ul> |  |  |  |  |
| □ abdominal ultrasound                                                                                                                                                                                               |  |  |  |  |

For peer review only

1  
2  
3  
4  
5  
6  
7  
8  
9  
10  
11  
12  
13  
14  
15  
16  
17  
18  
19  
20  
21  
22  
23  
24  
25  
26  
27  
28  
29  
30  
31  
32  
33  
34  
35  
36  
37  
38  
39  
40  
41  
42  
43  
44  
45  
46  
47  
48  
49  
50  
51  
52  
53  
54  
55  
56  
57  
58  
59  
60

|                                                                                                                                                                                                                                                                                                                                                                                                                                                                                                                                                                                                                                                                                                                                                                                                                                                                                                                                                                                                                                                                                                                                                                                                                                                                                                                                                                 |  |  |  |  |
|-----------------------------------------------------------------------------------------------------------------------------------------------------------------------------------------------------------------------------------------------------------------------------------------------------------------------------------------------------------------------------------------------------------------------------------------------------------------------------------------------------------------------------------------------------------------------------------------------------------------------------------------------------------------------------------------------------------------------------------------------------------------------------------------------------------------------------------------------------------------------------------------------------------------------------------------------------------------------------------------------------------------------------------------------------------------------------------------------------------------------------------------------------------------------------------------------------------------------------------------------------------------------------------------------------------------------------------------------------------------|--|--|--|--|
| <p>Procedural costs:</p> <ul style="list-style-type: none"> <li>• central venous catheter, peripherally inserted central catheter, arterial lines</li> <li>• chest tube</li> <li>• naso- or oro-gastric tube</li> <li>• percutaneous endoscopic gastrostomy (PEG) tube</li> <li>• tube feed</li> <li>• fiber</li> <li>• protein supplement</li> <li>• ventilator circuit changes</li> <li>• endotracheal tubes (with or without subglottic suction)</li> <li>• invasive ventilation (ventilator days) <ul style="list-style-type: none"> <li>○ heat moisture exchange</li> <li>○ heated humidifier</li> </ul> </li> <li>• non-invasive positive pressure ventilation</li> <li>• high-flow nasal cannula</li> <li>• vasopressor/inotropic agents</li> <li>• VAP prevention bundles <ul style="list-style-type: none"> <li>○ chlorhexidine usage</li> <li>○ bacterial filters</li> <li>○ oral decontamination</li> <li>○ gut decontamination</li> <li>○ oral antibiotic paste</li> </ul> </li> <li>• colonoscopy (cautery, epinephrine injection)</li> <li>• echocardiograms (transthoracic/transesophageal)</li> <li>• bronchoscopy</li> <li>• thoracostomy</li> <li>• tracheostomy</li> <li>• interventional radiology drain</li> <li>• intermittent hemodialysis</li> <li>• continuous renal replacement therapy</li> <li>• fecal management device</li> </ul> |  |  |  |  |
|-----------------------------------------------------------------------------------------------------------------------------------------------------------------------------------------------------------------------------------------------------------------------------------------------------------------------------------------------------------------------------------------------------------------------------------------------------------------------------------------------------------------------------------------------------------------------------------------------------------------------------------------------------------------------------------------------------------------------------------------------------------------------------------------------------------------------------------------------------------------------------------------------------------------------------------------------------------------------------------------------------------------------------------------------------------------------------------------------------------------------------------------------------------------------------------------------------------------------------------------------------------------------------------------------------------------------------------------------------------------|--|--|--|--|

|                                                             |                                                                                                                                                                                                                                         |  |  |  |  |
|-------------------------------------------------------------|-----------------------------------------------------------------------------------------------------------------------------------------------------------------------------------------------------------------------------------------|--|--|--|--|
| 1<br>2<br>3<br>4<br>5<br>6<br>7<br>8<br>9<br>10<br>11<br>12 | Operative costs <ul style="list-style-type: none"> <li>• laparotomy (toxic megacolon, bowel perforation)</li> <li>• colectomy</li> <li>• thoracotomy</li> <li>• open abdominal wound (vacuum-assisted closure (VAC) devices)</li> </ul> |  |  |  |  |
| 13<br>14<br>15<br>16                                        | <input type="checkbox"/> surgeon<br><input type="checkbox"/> surgical assistant<br><input type="checkbox"/> anaesthesiology<br><input type="checkbox"/> nursing                                                                         |  |  |  |  |
| 17<br>18<br>19<br>20                                        | Overhead costs <ul style="list-style-type: none"> <li><input type="checkbox"/> ICU days</li> <li><input type="checkbox"/> ward days</li> </ul>                                                                                          |  |  |  |  |

21  
22  
23  
24  
25  
26  
27  
28  
29  
30  
31  
32  
33  
34  
35  
36  
37  
38  
39  
40  
41  
42  
43  
44  
45  
46  
47  
48  
49  
50  
51  
52  
53  
54  
55  
56  
57  
58  
59  
60

CT = computerized tomography; ELISA = enzyme-linked immunosorbent assay; ICU = intensive care unit; LAMP = loop-mediated isothermal amplification; MRI = magnetic resonance imaging; NM = nuclear medicine; PEG = percutaneous endoscopic gastrostomy; PCR = polymerase chain reaction; PROSPECT = Probiotics: Prevention of Severe Pneumonia and Endotracheal Colonization Trial; US = United States; VAC = vacuum-assisted closure; VAP = ventilator-associated pneumonia;

Supplemental Table 2: Health economic evaluation assumptions

| Assumption                                                                                                                                                                                                                                                                                                                                                                                                                                                                                                                                                                                                                                                                                                                                                        | Rationale                                                                                                                                                                                                                                                                                                                                                                                                                                                                             |
|-------------------------------------------------------------------------------------------------------------------------------------------------------------------------------------------------------------------------------------------------------------------------------------------------------------------------------------------------------------------------------------------------------------------------------------------------------------------------------------------------------------------------------------------------------------------------------------------------------------------------------------------------------------------------------------------------------------------------------------------------------------------|---------------------------------------------------------------------------------------------------------------------------------------------------------------------------------------------------------------------------------------------------------------------------------------------------------------------------------------------------------------------------------------------------------------------------------------------------------------------------------------|
| <p>Prophylactic and therapeutic probiotic administration outside the ICU</p> <ul style="list-style-type: none"> <li>• If no prophylactic/therapeutic probiotics was used prior to trial enrollment, we will assume study product (<i>Lactobacillus rhamnosus</i> GG prophylaxis or placebo) will be used for duration of stay in the ICU with no other probiotic co-administration;</li> <li>• If open label probiotics were used in the ICU, we will assume study product (<i>Lactobacillus rhamnosus</i> GG prophylaxis or placebo) will still be used for duration of stay in the ICU (coadministered);</li> <li>• After the duration of ICU stay (transfer to the ward), we assume that there will be no further probiotic administration</li> </ul>          | <p>Ward-based/pre-admission ICU prophylactic and therapeutic probiotic administration was not directly measured</p>                                                                                                                                                                                                                                                                                                                                                                   |
| <p>Variability in investigations and treatment practice of disease/illness</p> <ul style="list-style-type: none"> <li>• Based on variability in incidence of disease/illness, we will investigate the incidence of each illness severity, and average resource utilization for a particular illness.</li> <li>• We will utilize the mean costs for a particular illness (we will attempt to directly derive this variability from the case report forms) For patients who undergo multiple investigations, treatment (medications/procedures/surgeries) for a particular disease/illness, we will assume the lowest number of potential interventions to treat the disease/illness, as well as mean resource utilization for such events from PROSPECT</li> </ul> | <p>Various clinical diagnoses will have variability in severity, and therefore, variability in the way they are investigated and treated (i.e. <i>C. difficile</i> could be investigated/treated with only culture assay, abdominal x-ray and antibiotics to colectomy). Based on prior scoping reviews for VAP/CDAD, there will be variability in the resource utilization of each treatment/test based on illness severity, which may drive differences in resource utilization</p> |

Investigations of other infectious outcomes

- For those illnesses that are only investigated if positive or indeterminate cultures are detected (i.e. endocarditis), we will assume there is a potential minimum and maximal resource utilization that would be used to investigate/treat a specific diagnosis
- Certain assumptions will need to be made for healthcare resource utilization for certain services, investigations, procedures/surgeries, as they may not be explicitly captured in PROSPECT, but can be gleaned indirectly from the case report forms
- For example:
  - central-line blood stream infections would be assumed to warrant a replacement or previous venous or arterial catheters;
  - broncho-alveolar lavage (BAL) cultures were assumed to have a bronchoscopy procedure to perform them
  - CDAD was assumed to have an abdominal x-ray (at a minimum) for radiological investigation
    - At a maximum, a proportion of patients would receive at CT abdo, colonoscopy/flexible sigmoidoscopy, laparotomy, colectomy, fecal transplant, vacuum-assisted closure device
  - empyema/lung abscess would be assumed to be diagnosed by CT chest, and treated with a chest tube (with a proportion of patients with tissue plasminogen activator into the pleural cavity, or VATS thoracotomy with decortication and irrigation and debridement)
  - abdominal x-rays can be used to count the number of abdominal drains inserted
    - a proportion of patients were assumed to receive an abdominal ultrasound, CT abdo, MRI abdo
  - we will assume that a positive blood culture with specific organisms (known to cause endocarditis) would warrant a transthoracic echocardiogram ± transesophageal echocardiogram;
  - confirmed endocarditis would be investigated with a transthoracic echocardiogram ± transesophageal echocardiogram
  - mediastinitis would be assumed to be

There are certain investigations or interventions that would be expected to be associated with various disease state suspicions (and given correct circumstances, we would assume these would be tested/treated in these ways)

1  
2  
3  
4 diagnosed by CT or MRI chest

- 5     ▪ at a maximum, they would receive an
- 6         thoracotomy/sternotomy for an I&D
- 7         and potential VAC dressing
- 8
- 9     ○ initiation (on the first day) of intermittent
- 10         hemodialysis or continuous renal
- 11         replacement therapy would incur a cost of
- 12         central venous hemodialysis line placement
- 13
- 14     ○ suspected meningitis/encephalitis case
- 15         would warrant a lumbar puncture ± CT or
- 16         MRI head;
- 17
- 18     ○ osteomyelitis would warrant a NM scan or
- 19         MRI;
- 20
- 21     ○ biliary tract infections would be assumed to
- 22         have at minimum an abdominal ultrasound;
- 23         ▪ At a maximum, a proportion of patients
- 24             would receive at CT abdo, ERCP,
- 25             percutaneous transhepatic
- 26             cholecystostomy (PTC) tube,
- 27             cholecystectomy
- 28
- 29     ○ pancreatic infections would be assumed to
- 30         have at minimum an abdominal ultrasound;
- 31         ▪ At a maximum, a proportion of patients
- 32             would receive at CT abdo, MRI abdo,
- 33             abdominal drain or aspiration
- 34
- 35     ○ typhilitis would be assumed to have at
- 36         minimum an abdo X-ray;
- 37         ▪ At a maximum, a proportion of patients
- 38             would receive at CT abdo
- 39
- 40     ○ toxic megacolon would be assumed to have
- 41         at minimum an abdo X-ray;
- 42         ▪ At a maximum, a proportion of
- 43             patients would receive at CT abdo
- 44
- 45     ○ urinary tract infection would be assumed to
- 46         have at a urinalysis and urine culture
- 47
- 48     ○ sinusitis would be assumed to have
- 49         investigations at baseline
- 50         ▪ At a maximum, a proportion of patients
- 51             would receive at CT head
- 52
- 53     ○ septic arthritis would be assumed to have an
- 54         aspiration culture at a minimum
- 55         ▪ At a maximum, a proportion of patients
- 56             would receive an orthopedic surgery
- 57             for I&D
- 58
- 59
- 60



|                                                                                                                                                                                                                                                                                                                                                                                                                                                  |                                                                                                                                                          |
|--------------------------------------------------------------------------------------------------------------------------------------------------------------------------------------------------------------------------------------------------------------------------------------------------------------------------------------------------------------------------------------------------------------------------------------------------|----------------------------------------------------------------------------------------------------------------------------------------------------------|
| <ul style="list-style-type: none"> <li>○ PEG tube insertion would be assumed to be placed when 1<sup>st</sup> record on the daily data form of PEG tube utilization (Daily Form 4.2 of 3)</li> <li>○ Tracheostomy insertion would be assumed to be placed when 1<sup>st</sup> record on the daily</li> </ul>                                                                                                                                     |                                                                                                                                                          |
| <p>data form (Daily Form 4.1 of 3 – Mechanical airway in place today)</p>                                                                                                                                                                                                                                                                                                                                                                        |                                                                                                                                                          |
| <p>Imputation of missing data</p> <ul style="list-style-type: none"> <li>□ For those patients with missing data from a clinical outcomes perspective, multiple imputation methods will be utilized – including generalized estimating equations (GEEs)</li> <li>□ For missing unit costs (which are not attainable from public jurisdiction databases or trial site - specific inquiries), we will utilize costing -ratio methodology</li> </ul> | <p>We will utilize standard multiple imputation methods to handle missing clinical outcome data, or costing-ratio methodology for missing unit costs</p> |

BAL = broncho-alveolar lavage; CDAD = C. Difficile-associated diarrhea; CT = computerized tomography; CXR = chest x-ray; ERCP = endoscopic retrograde cholangio-pancreatography; ICU = intensive care unit; I&D: irrigation & debridement; MRI = magnetic resonance imaging; NM = nuclear medicine; PEG = percutaneous endoscopic gastrostomy; PCR = polymerase chain reaction; PROSPECT = Probiotics: Prevention of Severe Pneumonia and Endotracheal

1  
2  
3 Colonization Trial; US = United States; VAC = vacuum-assisted closure; VAP =  
4 ventilator-associated pneumonia; VATS = video-assisted thoroscopic surgery  
5  
6  
7  
8  
9  
10  
11  
12  
13  
14  
15  
16  
17  
18  
19  
20  
21  
22  
23  
24  
25  
26  
27  
28  
29  
30  
31  
32  
33  
34  
35  
36  
37  
38  
39  
40  
41  
42  
43  
44  
45  
46  
47  
48  
49  
50  
51  
52  
53  
54  
55  
56  
57  
58  
59  
60

Supplemental Table 3: Health economic evaluation assumptions

| Assumption                                                                                                                                                                                                                                                                                                                                                                                                                                                                                                                                                                                                                                                                                                                                                    | Rationale                                                                                                                                                                                                                                                                                                                                                                                                                                                                             |
|---------------------------------------------------------------------------------------------------------------------------------------------------------------------------------------------------------------------------------------------------------------------------------------------------------------------------------------------------------------------------------------------------------------------------------------------------------------------------------------------------------------------------------------------------------------------------------------------------------------------------------------------------------------------------------------------------------------------------------------------------------------|---------------------------------------------------------------------------------------------------------------------------------------------------------------------------------------------------------------------------------------------------------------------------------------------------------------------------------------------------------------------------------------------------------------------------------------------------------------------------------------|
| <p>Prophylactic and therapeutic probiotic administration outside the ICU</p> <ul style="list-style-type: none"> <li>If no prophylactic/therapeutic probiotics was used prior to trial enrollment, we will assume study product (<i>Lactobacillus rhamnosus</i> GG prophylaxis or placebo) will be used for duration of stay in the ICU with no other probiotic co-administration;</li> <li>If open label probiotics were used in the ICU, we will assume study product (<i>Lactobacillus rhamnosus</i> GG prophylaxis or placebo) will still be used for duration of stay in the ICU (co-administered);</li> <li>After the duration of ICU stay (transfer to the ward), we assume that there will be no further probiotic administration</li> </ul>           | <p>Ward-based/pre-admission ICU prophylactic and therapeutic probiotic administration was not directly measured</p>                                                                                                                                                                                                                                                                                                                                                                   |
| <p>Variability in investigations and treatment practice of disease/illness</p> <ul style="list-style-type: none"> <li>Based on variability in incidence of disease/illness, we will investigate the incidence of each illness severity, and average resource utilization for a particular illness.</li> <li>We will utilize the mean costs for a particular illness (we will attempt to directly derive this variability from the case report forms) For patients who undergo multiple investigations, treatment (medications/procedures/surgeries) for a particular disease/illness, we will assume the lowest number of potential interventions to treat the disease/illness, as well as mean resource utilization for such events from PROSPECT</li> </ul> | <p>Various clinical diagnoses will have variability in severity, and therefore, variability in the way they are investigated and treated (i.e. <i>C. difficile</i> could be investigated/treated with only culture assay, abdominal x-ray and antibiotics to colectomy). Based on prior scoping reviews for VAP/CDAD, there will be variability in the resource utilization of each treatment/test based on illness severity, which may drive differences in resource utilization</p> |

Investigations of other infectious outcomes

- For those illnesses that are only investigated if positive or indeterminate cultures are detected (i.e. endocarditis), we will assume there is a potential minimum and maximal resource utilization that would be used to investigate/treat a specific diagnosis
- Certain assumptions will need to be made for healthcare resource utilization for certain services, investigations, procedures/surgeries, as they may not be explicitly captured in PROSPECT, but can be gleaned indirectly from the case report forms
- For example:
  - central-line blood stream infections would be assumed to warrant a replacement or previous venous or arterial catheters;
  - broncho-alveolar lavage (BAL) cultures were assumed to have a bronchoscopy procedure to perform them
  - CDAD was assumed to have an abdominal x-ray (at a minimum) for radiological investigation
    - At a maximum, a proportion of patients would receive at CT abdo, colonoscopy/flexible sigmoidoscopy, laparotomy, colectomy, fecal transplant, vacuum-assisted closure device
  - empyema/lung abscess would be assumed to be diagnosed by CT chest, and treated with a chest tube (with a proportion of patients with tissue plasminogen activator into the pleural cavity, or VATS thoracotomy with decortication and irrigation and debridement)
  - abdominal x-rays can be used to count the number of abdominal drains inserted
    - a proportion of patients were assumed to receive an abdominal ultrasound, CT abdo, MRI abdo
  - we will assume that a positive blood culture with specific organisms (known to cause endocarditis) would warrant a transthoracic echocardiogram ± transesophageal echocardiogram;
  - confirmed endocarditis would be investigated with a transthoracic echocardiogram ± transesophageal echocardiogram
  - mediastinitis would be assumed to be

There are certain investigations or interventions that would be expected to be associated with various disease state suspicions (and given correct circumstances, we would assume these would be tested/treated in these ways)

1  
2  
3 diagnosed by CT or MRI chest

- 4     ▪ at a maximum, they would receive  
5         an thoracotomy/sternotomy for an  
6         I&D and potential VAC dressing
- 7 ○ initiation (on the first day) of intermittent  
8     hemodialysis or continuous renal  
9     replacement therapy would incur a cost of  
10    central venous hemodialysis line placement
- 11 ○ suspected meningitis/encephalitis case  
12    would warrant a lumbar puncture ± CT or  
13    MRI head;
- 14 ○ osteomyelitis would warrant a NM scan or  
15    MRI;
- 16 ○ biliary tract infections would be assumed to  
17    have at minimum an abdominal ultrasound;  
18     ▪ At a maximum, a proportion of  
19         patients would receive at CT abdo,  
20         ERCP, percutaneous transhepatic  
21         cholecystostomy (PTC) tube,  
22         cholecystectomy
- 23 ○ pancreatic infections would be assumed to  
24    have at minimum an abdominal ultrasound;  
25     ▪ At a maximum, a proportion of  
26         patients would receive at CT abdo,  
27         MRI abdo, abdominal drain or  
28         aspiration
- 29 ○ typhilitis would be assumed to have at  
30    minimum an abdo X-ray;  
31     ▪ At a maximum, a proportion of  
32         patients would receive at CT abdo
- 33 ○ toxic megacolon would be assumed to have  
34    at minimum an abdo X-ray;  
35     ▪ At a maximum, a proportion of  
36         patients would receive at CT abdo
- 37 ○ urinary tract infection would be assumed to  
38    have at a urinalysis and urine culture
- 39 ○ sinusitis would be assumed to have  
40    investigations at baseline  
41     ▪ At a maximum, a proportion of  
42         patients would receive at CT head
- 43 ○ septic arthritis would be assumed to have  
44    an aspiration culture at a minimum  
45     ▪ At a maximum, a proportion of  
46         patients would receive an orthopedic  
47         surgery for I&D
- 48 ○ PEG tube insertion would be assumed to be  
49    placed when 1<sup>st</sup> record on the daily data  
50    form of PEG tube utilization (Daily Form 4.2  
51    of 3)
- 52 ○ Tracheostomy insertion would be assumed  
53    to be placed when 1<sup>st</sup> record on the daily  
54  
55  
56  
57  
58  
59  
60

|                                                                                                                                                                                                                                                                                                                                                                                                                                               |                                                                                                                                                          |
|-----------------------------------------------------------------------------------------------------------------------------------------------------------------------------------------------------------------------------------------------------------------------------------------------------------------------------------------------------------------------------------------------------------------------------------------------|----------------------------------------------------------------------------------------------------------------------------------------------------------|
| <p>data form (Daily Form 4.1 of 3 – Mechanical airway in place today)</p>                                                                                                                                                                                                                                                                                                                                                                     |                                                                                                                                                          |
| <p>Imputation of missing data</p> <ul style="list-style-type: none"> <li>• For those patients with missing data from a clinical outcomes perspective, multiple imputation methods will be utilized – including generalized estimating equations (GEEs)</li> <li>• For missing unit costs (which are not attainable from public jurisdiction databases or trial site-specific inquiries), we will utilize costing-ratio methodology</li> </ul> | <p>We will utilize standard multiple imputation methods to handle missing clinical outcome data, or costing-ratio methodology for missing unit costs</p> |

BAL = broncho-alveolar lavage; CDAD = C. Difficile-associated diarrhea; CT = computerized tomography; CXR = chest x-ray; ERCP = endoscopic retrograde cholangio-pancreatography; ICU = intensive care unit; I&D: irrigation & debridement; MRI = magnetic resonance imaging; NM = nuclear medicine; PEG = percutaneous endoscopic gastrostomy; PCR = polymerase chain reaction; PROSPECT = Probiotics: Prevention of Severe Pneumonia and Endotracheal Colonization Trial; US = United States; VAC = vacuum-assisted closure; VAP = ventilator-associated pneumonia; VATS = video-assisted thorascopic surgery

## Supplemental Table 4: E-PROSPECT Costing Manual

E-PROSPECT: The economic evaluation of PROSPECT (Probiotics: Prevention of Severe Pneumonia and Endotracheal Colonization Trial)

### Operations Manual

#### Costing Methodology and Definitions

### Data Collection

*Clinical Outcomes:* Clinical data on every patient will be collected as part of PROSPECT. Site coordinators have already participated in the main clinical randomized controlled trial (RCT), and undergone intensive training session to review the methods and case report forms (CRFs) of the main trial. The Methods Centre at McMaster University will manage PROSPECT data, providing patient characteristics, tests, treatments, and outcomes (e.g., infections, adverse events, duration of stay in ICU and hospital, and mortality in ICU and hospital). We will obtain variable names from the Methods Centre at McMaster to associate them with costs.

*Resource utilization:* To determine the incremental cost of patients receiving probiotics compared to placebo (with usual care), the resources consumed by patients in PROSPECT will be collected. Enrolled patients are in the intensive care unit (ICU), and are randomized to receive probiotics or placebo, with daily follow-up to identify relevant outcomes. In determining incremental costs, only resources which differ between the two treatment groups need to be identified. However, because the resources that will differ are uncertain, the economic evaluation will be conducted alongside to the RCT as a sub-study, with all important resources being ascertained and analyzed. Once resources are identified, resource utilization and the unit costs of each item for each given patient needs to be calculated.

For purposes of a health economic evaluation, resources will be translated into monetary values. Resource utilization variables associated with the direct medical costs of critically ill patients include: (1) medications; (2) laboratory testing; (3) personnel; (4) radiology testing; (5) procedures/surgeries, and (6) complications/adverse clinical outcomes. Overhead costs include: (1) ICU costs and (2) ward costs. A comprehensive list of direct medical resource utilization elements associated with critically ill patients will be identified. Previous studies (Fowler et al. - Pilot) discovered that public and private-funded institutions have considerable variability in patient costing, and that line-by-line item costs are not available routinely. Many summary cost measures tend to “roll-up” individual items costs rather than listing them as unit costs, which would not allow for a linkage of costs and clinical events (the later measured as part of the PROSPECT CRFs).

This previously established cost-gathering methodology (Fowler et al. – Pilot) captures hospital-specific line item costs, according to important variables that we anticipate will drive costs and possible cost-effectiveness. These “big ticket items” are determined by: (1) a systematic review (SR) of probiotics economic evaluations for preventing healthcare-associated infections (ventilator-associated pneumonia, *Clostridioides difficile*-associated diarrhea, antibiotic-associated diarrhea) in hospitalized

1  
2  
3  
4  
5 patients (Lau 2019), (2) the PROSPECT CRFs, and (3) experts in healthcare-associated infections in the  
6 ICU. If additional costing and utilization information cannot be gleaned from these sources, then certain  
7 methodological assumptions (Table 4) will be made regarding resource utilization for potential routine  
8 utilization for specific diagnoses/complications.  
9

10 Further to this, we will be conducting a pilot phase of unit cost acquisition at a sampling of sites to  
11 determine which unit costs can be feasibly obtained. It is possible that the pilot phase of this work may  
12 inform changes to this protocol, as well as the analysis of the economic evaluation. For example, if a unit  
13 cost for a particular line-item is deemed to be small and not a major driver of costs, then that line-item may  
14 be removed from the final analysis. The same would apply if a specific line-item has a low clinical incidence  
15 rate or no difference in clinical outcome/resource utilization between intervention and control groups, as  
16 little to no incremental difference in costs would exist between the two arms. Once the list of line-items has  
17 been pared down to those which are deemed to be major cost drivers, clinically relevant, but also feasible  
18 to obtain, this new line-item list will be surveyed across all sites.  
19

20  
21 Unit costs will be obtained from various sources including: (1) departments within participating  
22 hospitals, (2) provincial/state/country source databases. Costs conversion will involve collecting costs in  
23 their natural currency units from the participating center, and then converting to American dollars in the  
24 year of publication (2020). Discounting will not be applied for short-term (<1 year) time-horizon events.  
25

### 26 *Unit Costs*

27 A unit cost differs from a charge:

- 28 • Costs are the expenses incurred by the hospital for the service/procedure rendered.
- 29 • Charge is the amount that hospital requires drug companies/researchers to pay for a  
30 service/procedure to be conducted at their hospital. A charge usually consists of the cost of performing  
31 the service/procedure plus a mark-up fee.
- 32 • Hospitals may have a charge-to-cost conversion for unit costs – which we will try to obtain.  
33  
34

35 Unit costs will be obtained by several methods:

#### 36 1) Hospital budgets

37  
38 Ideally, all costs would reflect expenses in the hospital budget. This information will be obtained from  
39 hospital financial departments if available. However, in most cases, unit costs are not available for reasons  
40 such as: item costs are presented in bulk quantity costs, or item costs are several years outdated, or prices  
41 cannot be disclosed due to agreement with suppliers.  
42  
43

#### 44 2) Government reimbursement

45  
46 If hospital budget costs are not available, costs will be obtained from government sources/databases.  
47 In public healthcare systems, the country's government is mostly accountable for reimbursements of  
48 services rendered. We will obtain unit costs from a government schedule of benefits, which delineate the  
49 reimbursement for each procedure or test by laboratories, hospitals and healthcare professionals. If the  
50 schedule of fees is unavailable or have restricted access, the information will be collected through contact  
51 with medical professionals (i.e. pharmacist, ICU manager, etc.) from PROSPECT-associated hospitals. In  
52 jurisdictions in which there is a mix of both private and public healthcare (i.e. US), the total private health  
53  
54  
55  
56  
57  
58  
59  
60



1  
2  
3  
4  
5 care fee (i.e. Medicare Benefits Schedule Book) or equivalent government medical benefits schedule may  
6 be used.  
7

### 8 3) Charge to Cost Ratios

9 If costs cannot be acquired, the amount that a hospital charges for a procedure, either to patients or to  
10 investigators for clinical trials will be used where cost-to-charge ratios are available. We will use  
11 cost:charge ratios that relate to individual costs, as opposed to “rolled-up” ratios, as much as possible.  
12  
13

#### 14 General Costing Procedures

15 The PROSPECT site investigators list (maintained by the McMaster Methods Centre) will be used to  
16 identify who to initially contact for costing information. An introductory e-mail will be sent to select site  
17 investigators (and to the research coordinator, if known) to inform them of E-PROSPECT and to request  
18 their assistance to obtain costing information from their site during the pilot phase of unit cost acquisition.  
19 If there is no response by the PROSPECT site investigators, individuals will be contacted 2 more times via  
20 telephone, email. If there is still no response, or if the site investigators decline to participate, the site’s unit  
21 costs will be excluded from analysis. Once pilot phase testing is completed, the new line-item unit cost list  
22 will be sent to all sites for the remaining unit costs which could not be acquired from public databases.  
23  
24

25 The general procedure for initiating the costing exercise at each hospital will be as follows:

- 26 1. We will contact the PROSPECT site investigator and research coordinator to identify the most  
27 appropriate person to identify the requested costs.
- 28 2. We will contact these individuals, inform them of E-PROSPECT, and request the hospital-related costs.  
29 In some cases, PROSPECT site investigators may prefer to contact these individuals themselves. The  
30 e-mail (below) will be sent to contacts.
- 31 3. For each cost item, we will ask about the relevant person at the hospital who is most responsible for  
32 knowing/determining the hospital-specific cost (e.g. radiology, pharmacy, ICU personnel) will be  
33 contacted.  
34
- 35 4. We will ask if a hospital specific cost exists for each variable.
- 36 5. We will determine if the cost is an actual cost, or “charge”. If the item is a charge, a hospital line-item  
37 specific cost-to-charge ratio will be required.  
38  
39
- 40 6. If the cost is generalizable to a broader geography (health region laboratory cost, provincial physician  
41 reimbursement rate, etc.), then we will obtain these costs from the investigators and compare these to  
42 the hospital specific costs. Significant discrepancies will be further interrogated to determine whether  
43 the difference is real, and which best approximates actual cost (vs. charge). Notations will be made on  
44 the dataset and used for future decisions about which numbers to apply to the eventual economic  
45 analyses. The list of study variables, definitions, and documentation examples for sources of variable  
46 values is below.

47 Sample Communication to Identified Individuals at E-PROSPECT Sites  
48  
49  
50  
51  
52

1  
2  
3  
4  
5  
6  
7 Dear colleague,

8 I am helping with the economic evaluation of the PROSPECT study (E-PROSPECT). We are in the  
9 process of gathering costing data on key variables and suspected drivers of cost from all sites involved in  
10 PROSPECT (in Canada, the US, and Saudi Arabia). The site principal investigator(s)/research  
11 coordinator(s) has passed on your contact information as an individual who could hopefully assist us with  
12 **unit cost** collection for E-PROSPECT.

13  
14 Our goal primarily is:

15 **To collect unit costs for specific items in PROSPECT, NOT for any patient-specific data.**

16 We are looking for the **unit costs** to be listed in your **local currency** for this **year (2019)**.

17 A unit cost is defined as:

18 A **unit cost** is the **expenditure/cost** spent on **one unit** of a particular medication, diagnostic test,  
19 investigation, procedure, surgery or personnel in health care.

20 For example:

- 21 - For a specific antibiotic (i.e. ceftriaxone), we are looking for the unit cost for this medication
  - 22 o The specific cost (unit cost) at the particular dose (1 unit) that your institution pays for the
  - 23 medication (i.e. Ceftriaxone: \$50.00 CDN per 1 gram of medication)
- 24 - For a specific diagnostic test (i.e. echocardiogram), we are looking for the unit cost per 1 test (i.e.
- 25 transthoracic echocardiogram: \$119.00 CDN per 1 echocardiogram)
- 26 - For a specific personnel (i.e. nurse), we are looking for the per diem (day) cost for that staff member
- 27 (i.e. Nurse: \$200.00 CDN per day)
- 28 - For overhead cost, we are looking for the per diem (day) cost for 1 day stay in the ICU and 1 day
- 29 stay on the ward o *We request the per diem day cost broken down into its component parts (i.e.*
- 30 *personnel, devices, etc.), as we will need to ensure that we do not double-count the cost of items*
- 31
- 32 - Attached to this costing manual (and also in the data extraction spreadsheet) are key variables we
- 33 are hoping to obtain from your site
- 34 - If either yourself, or someone else at your center is **able to put us in touch with someone to contact**
- 35 **at your site**, that would be greatly appreciated.
- 36 - Sometimes there is a costing person attached to ICU or a costing/charging department. Sometimes
- 37 we have found it necessary to track down someone in radiology, pharmacy, ICU, lab services, etc.
- 38 Could you please put us on the right track with names/emails or by forwarding this request? - We
- 39 would like to include your names in the publications arising from this work.
- 40
- 41
- 42
- 43

44 Thanks very much for your help and continued support of PROSPECT.

45 Sincerely,

46 Dr. Vincent Lau, MD, FRCPC, McMaster HRM MSc(c)

47 **Supervised by: Drs. Deborah J. Cook, Bram Rochweg, Feng Xie, Jennie Johnstone and Rob Fowler E-**  
48 **PROSPECT COST LIST**

49  
50  
51 **Pharmacy Costs** - Just Tell us Who to Contact:   
52 probiotics (*Lactobacillus rhamnosus* GG)

- antibiotics:
  - piperacillin-tazobactam
  - ceftriaxone
  - ceftazidime
  - azithromycin
  - vancomycin
  - metronidazole
  - levofloxacin
  - imipenem
  - meropenem
  - amoxicillin-clavulin
  - cefuroxime
  - linezolid
  - cefazolin
  - cloxacillin
  - ciprofloxacin
  - gentamicin
  - trimethoprim-sulfamethoxazole
- steroids
  - dexamethasone
  - methylprednisone
  - hydrocortisone
  - prednisone
- stress ulcer prophylaxis
  - cimetidine
  - ranitidine
  - famotidine
  - nizatidine
  - lansoprazole
  - dexlansoprazole
  - pantoprazole
  - esomeprazole
  - omeprazole
  - rabeprazole
- laxatives/motility agents
  - domperidone
  - metoclopramide
  - erythromycin
  - senna
  - dulcolax
  - golytely
  - glycerin
  - lactulose
  - colace
  - citro-mag
  - PegLyte
  - pancreatic enzymes
  - enema
- opiates
  - morphine
  - hydromorphone
  - demerol
  - fentanyl
  - oxycodone
  - percocets

#### Clinical Laboratory Costs - Just Tell us Who to Contact:

- complete blood count
- creatinine
- arterial blood gas
- lactate
- albumin
- blood cultures
- urine cultures
- sputum/tracheal aspirate/bronchoalveolar lavage cultures
- *C. difficile* polymerase chain reaction (PCR), toxin assays, ELISA, cell culture, LAMP
- other aerobic/anaerobic cultures
  - thoracentesis
  - paracentesis

#### General ICU and Ward Costs/Personnel - Just Tell us Who to Contact:

- most responsible physician
  - ICU
  - Hospital
- consultation physicians (general surgery, thoracic surgery, gastroenterology, infectious disease specialists, respirology)
- nurse

- pharmacist
- respiratory therapist
- physical therapist
- social worker
- ICU clerk
- ICU days (generic cost)
- ward days (generic cost)

#### Radiology Costs - Just Tell us Who to Contact:

- portable chest radiograph
- portable abdominal radiograph
- computerized tomography (CT) scan: chest, abdomen, pelvis, sinusitis, head
- MRI: head, chest, joint
- abdominal ultrasound

#### Procedural Costs - Just Tell us Who to Contact:

- central venous catheter, peripherally inserted central catheter, arterial lines
- chest tube
- naso- or oro-gastric tube
- percutaneous endoscopic gastrostomy (PEG) tube
- tube feed
- fiber
- protein supplement
- ventilator circuit changes
- endotracheal tubes (with or without subglottic suction)
- invasive ventilation (ventilator days) ○ heat moisture exchange ○ heated humidifier
- non-invasive positive pressure ventilation
- high-flow nasal cannula
- vasopressor/inotropic agents
- VAP prevention bundles ○ chlorhexidine usage ○ bacterial filters ○ oral decontamination ○ gut decontamination ○ oral antibiotic paste
- colonoscopy (cautery, epinephrine injection)
- echocardiograms (transthoracic/transesophageal)
- bronchoscopy
- thoracostomy
- tracheostomy
- interventional radiology drain
- intermittent hemodialysis
- peritoneal dialysis
- continuous renal replacement therapy
- fecal management device

1  
2  
3  
4  
5 Cost reimbursed by the governing authority to the primary physician for procedure that is rendered at a  
6 hospital. Costs often include a Professional component, and a Technical component.  
7

8  
9 The *professional component* consists of:

- 10  
11 A. Providing clinical supervision, including approving, modifying and/or intervening in the performance  
12 of the procedure where appropriate, and quality control of all elements of the technical component  
13 of the procedure.  
14 B. Performance of any clinical procedure associated with the diagnostic procedure which is not  
15 separately billable (e.g. injections which are an integral part of the study) and of any fluoroscopy.  
16 C. Where appropriate, post-procedure monitoring, including intervening except where this constitutes  
17 a separately billable service.  
18 D. Interpreting the results of the diagnostic procedure.  
19 E. Providing premises for any aspect(s) of A and D that is(are) performed at a place other than the  
20 place in which the procedure is performed.  
21  
22

23 The *technical component* consists of:

- 24 A. Preparing the patient for the procedure.  
25 B. Performing the diagnostic procedure or assisting in the performance of fluoroscopy.  
26 C. Making arrangements for any appropriate follow-up care.  
27 D. Providing records of the results of the procedure to the interpreting physician.  
28 E. Discussion with, and providing information and advice to, the patient or patient's representative(s),  
29 whether by telephone or otherwise, on matters related to the service.  
30 F. Preparing and transmitting a written, signed and dated interpretive report of the procedure to the  
31 referring physician.  
32 G. Providing premises, equipment, supplies and personnel for all specific elements of the technical  
33 and professional components except for the premises for any aspect(s) of A and D of the  
34 professional component that is(are) not performed at the place in which the procedure is performed.  
35  
36  
37

38 Operative Costs - Just Tell us Who to Contact:

- 39 • laparotomy (toxic megacolon, bowel perforation)  
40 • colectomy  
41 • thoracotomy  
42 • open abdominal wound (vacuum-assisted closure (VAC) devices)  
43 • surgeon  
44 • surgical assistant  
45 • anesthesiology  
46 • nursing  
47  
48

49 Definition of Variables, Source Documentation for Values

50 NOTE THAT DEFINITIONS MAY DIFFER ACROSS JURISDICTIONS. PLEASE USE THE DEFINITIONS  
51 AS A GUIDELINE.  
52  
53  
54  
55  
56  
57  
58  
59

## Drug costs

Unit cost to be paid by the hospital to the drug company as negotiated between the hospital and the drug company. The cost is usually found in the hospital drug formulary, or is known to the hospital pharmacy contact.

### Resource Utilization and Unit Costs

| Variable                                                                     | Definition                                                                                          | Unit for costing determination (dose and route)   | Unit cost | Source                                                | Captured in PROSPECT CRF |
|------------------------------------------------------------------------------|-----------------------------------------------------------------------------------------------------|---------------------------------------------------|-----------|-------------------------------------------------------|--------------------------|
| Study-related drugs                                                          |                                                                                                     |                                                   |           |                                                       |                          |
| <input type="checkbox"/> probiotics<br>( <i>Lactobacillus rhamnosus GG</i> ) | Live microorganisms which when administered in adequate amounts confer a health benefit on the host | 1× 10 <sup>10</sup><br>colony forming units (cfu) |           | iHealth/pharmacy contact (name, date)                 | Form 4.1 and 5           |
| Antibiotics:                                                                 |                                                                                                     |                                                   |           |                                                       |                          |
| <input type="checkbox"/> piperacillin/tazobactam                             | Amino-penicillin antibiotic                                                                         |                                                   |           | E.g. hospital formulary pharmacy contact (name, date) | Form 7.1                 |
| <input type="checkbox"/> ceftriaxone                                         | Third-generation cephalosporin antibiotic                                                           |                                                   |           | E.g. hospital formulary pharmacy contact (name, date) | Form 7.1                 |
| <input type="checkbox"/> ceftazidime                                         | Third-generation cephalosporin antibiotic                                                           |                                                   |           | E.g. hospital formulary pharmacy contact (name, date) | Form 7.1                 |
| <input type="checkbox"/> azithromycin                                        | Macrolide antibiotic                                                                                |                                                   |           | E.g. hospital formulary pharmacy contact (name, date) | Form 7.1                 |
| <input type="checkbox"/> vancomycin                                          | Glycopeptide antibiotic                                                                             |                                                   |           | E.g. hospital formulary pharmacy contact (name, date) | Form 7.1                 |
| <input type="checkbox"/> metronidazole                                       | Nitroimidazole antibiotic                                                                           |                                                   |           | E.g. hospital formulary pharmacy contact (name, date) | Form 7.1                 |
| <input type="checkbox"/> levofloxacin                                        | Fluoroquinolone antibiotic                                                                          |                                                   |           | E.g. hospital formulary pharmacy contact (name, date) | Form 7.1                 |
| <input type="checkbox"/> imipenem                                            | Carbapenem antibiotic                                                                               |                                                   |           | E.g. hospital formulary pharmacy contact (name, date) | Form 7.1                 |
| <input type="checkbox"/> meropenem                                           | Carbapenem antibiotic                                                                               |                                                   |           | E.g. hospital formulary pharmacy contact (name, date) | Form 7.1                 |
| <input type="checkbox"/> amoxicillin/clavulin                                | Amino-penicillin antibiotic                                                                         |                                                   |           | E.g. hospital formulary pharmacy contact (name, date) | Form 7.1                 |
| <input type="checkbox"/> cefuroxime                                          | Second-generation cephalosporin antibiotic                                                          |                                                   |           | E.g. hospital formulary pharmacy contact (name, date) | Form 7.1                 |
| <input type="checkbox"/> linezolid                                           | Oxazolidinones                                                                                      |                                                   |           | E.g. hospital formulary pharmacy contact (name, date) | Form 7.1                 |
| <input type="checkbox"/> cefazolin                                           | First-generation cephalosporin antibiotic                                                           |                                                   |           | E.g. hospital formulary pharmacy contact (name, date) | Form 7.1                 |
| <input type="checkbox"/> cloxacillin                                         | Amino-penicillin antibiotic                                                                         |                                                   |           | E.g. hospital formulary pharmacy contact (name, date) | Form 7.1                 |
| <input type="checkbox"/> ciprofloxacin                                       | Fluoroquinolone antibiotic                                                                          |                                                   |           | E.g. hospital formulary pharmacy contact (name, date) | Form 7.1                 |

|                          |                               |                                                          |  |  |                                                       |          |
|--------------------------|-------------------------------|----------------------------------------------------------|--|--|-------------------------------------------------------|----------|
| <input type="checkbox"/> | gentamicin                    | Aminoglycoside antibiotic                                |  |  | E.g. hospital formulary pharmacy contact (name, date) | Form 7.1 |
| <input type="checkbox"/> | trimethoprim-sulfamethoxazole | Dihydrofolate reductase inhibitor/sulfonamide antibiotic |  |  | E.g. hospital formulary pharmacy contact (name, date) | Form 7.1 |
| Steroids:                |                               |                                                          |  |  |                                                       |          |
| <input type="checkbox"/> | dexamethasone                 | Glucocorticoid steroid                                   |  |  | E.g. hospital formulary pharmacy contact (name, date) | Form 4.2 |
| <input type="checkbox"/> | methylprednisone              | Glucocorticoid/mineralocorticoid steroid                 |  |  | E.g. hospital formulary pharmacy contact (name, date) | Form 4.2 |
| <input type="checkbox"/> | hydrocortisone                | Glucocorticoid/mineralocorticoid steroid                 |  |  | E.g. hospital formulary pharmacy contact              | Form 4.2 |

|                           |                 |                                                       |  |  |                                                       |          |
|---------------------------|-----------------|-------------------------------------------------------|--|--|-------------------------------------------------------|----------|
|                           |                 |                                                       |  |  | (name, date)                                          |          |
| <input type="checkbox"/>  | prednisone      | Glucocorticoid/mineralocorticoid steroid              |  |  | E.g. hospital formulary pharmacy contact (name, date) | Form 4.2 |
| Stress ulcer prophylaxis: |                 |                                                       |  |  |                                                       |          |
| <input type="checkbox"/>  | cimetidine      | Histamine H2 receptor blocker gastric acid suppressor |  |  | E.g. hospital formulary pharmacy contact (name, date) | Form 4.2 |
| <input type="checkbox"/>  | ranitidine      | Histamine H2 receptor blocker gastric acid suppressor |  |  | E.g. hospital formulary pharmacy contact (name, date) | Form 4.2 |
| <input type="checkbox"/>  | famotidine      | Histamine H2 receptor blocker gastric acid suppressor |  |  | E.g. hospital formulary pharmacy contact (name, date) | Form 4.2 |
| <input type="checkbox"/>  | nizatidine      | Histamine H2 receptor blocker gastric acid suppressor |  |  | E.g. hospital formulary pharmacy contact (name, date) | Form 4.2 |
| <input type="checkbox"/>  | lansoprazole    | Proton pump inhibitor antacid gastric acid suppressor |  |  | E.g. hospital formulary pharmacy contact (name, date) | Form 4.2 |
| <input type="checkbox"/>  | dexlansoprazole | Proton pump inhibitor gastric acid suppressor         |  |  | E.g. hospital formulary pharmacy contact (name, date) | Form 4.2 |
| <input type="checkbox"/>  | pantoprazole    | Proton pump inhibitor gastric acid suppressor         |  |  | E.g. hospital formulary pharmacy contact (name, date) | Form 4.2 |
| <input type="checkbox"/>  | esomeprazole    | Proton pump inhibitor gastric acid suppressor         |  |  | E.g. hospital formulary pharmacy contact (name, date) | Form 4.2 |
| <input type="checkbox"/>  | omeprazole      | Proton pump inhibitor gastric acid suppressor         |  |  | E.g. hospital formulary pharmacy contact (name, date) | Form 4.2 |
| <input type="checkbox"/>  | rabeprazole     | Proton pump inhibitor gastric acid suppressor         |  |  | E.g. hospital formulary pharmacy contact (name, date) | Form 4.2 |
| Laxatives/motility agents |                 |                                                       |  |  |                                                       |          |
| <input type="checkbox"/>  | domperidone     | Anti-dopamine (D2) receptor blocker anti-emetic       |  |  | E.g. hospital formulary pharmacy contact (name, date) | Form 4.2 |
| <input type="checkbox"/>  | metoclopramide  | Anti-dopamine (D2) receptor blocker anti-emetic       |  |  | E.g. hospital formulary pharmacy contact (name, date) | Form 4.2 |

|                          |              |                                                                        |  |  |                                                       |          |
|--------------------------|--------------|------------------------------------------------------------------------|--|--|-------------------------------------------------------|----------|
| <input type="checkbox"/> | erythromycin | Macrolide antibiotic/Motilin receptor agonist (increased gut motility) |  |  | E.g. hospital formulary pharmacy contact (name, date) | Form 4.2 |
| <input type="checkbox"/> | senna        | Laxative                                                               |  |  | E.g. hospital formulary pharmacy contact (name, date) | Form 4.2 |
| <input type="checkbox"/> | dulcolax     | Laxative                                                               |  |  | E.g. hospital formulary pharmacy contact (name, date) | Form 4.2 |
| <input type="checkbox"/> | golytely     | Laxative                                                               |  |  | E.g. hospital formulary pharmacy contact (name, date) | Form 4.2 |
| <input type="checkbox"/> | glycerin     | Laxative                                                               |  |  | E.g. hospital formulary pharmacy contact (name, date) | Form 4.2 |
| <input type="checkbox"/> | lactulose    | Laxative                                                               |  |  | E.g. hospital formulary pharmacy contact (name, date) | Form 4.2 |
| <input type="checkbox"/> | colace       | Laxative                                                               |  |  | E.g. hospital formulary pharmacy contact (name, date) | Form 4.2 |
| <input type="checkbox"/> | citro-mag    | Laxative                                                               |  |  | E.g. hospital formulary pharmacy contact (name, date) | Form 4.2 |
| <input type="checkbox"/> | PegLyte      | Laxative                                                               |  |  | E.g. hospital formulary pharmacy contact (name, date) | Form 4.2 |
| <input type="checkbox"/> | pancreatic   | Laxative                                                               |  |  | E.g. hospital formulary                               | Form 4.2 |

|                          |                      |                                                                                                                                                                    |        |  |                                                                                                                                                                                                        |               |
|--------------------------|----------------------|--------------------------------------------------------------------------------------------------------------------------------------------------------------------|--------|--|--------------------------------------------------------------------------------------------------------------------------------------------------------------------------------------------------------|---------------|
|                          | enzymes              |                                                                                                                                                                    |        |  | pharmacy contact (name, date)                                                                                                                                                                          |               |
| <input type="checkbox"/> | enema                | Colonic irrigation                                                                                                                                                 |        |  | E.g. hospital formulary pharmacy contact (name, date)                                                                                                                                                  | Form 4.2      |
|                          | Opiates              |                                                                                                                                                                    |        |  |                                                                                                                                                                                                        |               |
| <input type="checkbox"/> | morphine             | Mu-receptor opiate                                                                                                                                                 |        |  | E.g. hospital formulary pharmacy contact (name, date)                                                                                                                                                  | Form 4.2      |
| <input type="checkbox"/> | hydromorphone        | Mu-receptor opiate                                                                                                                                                 |        |  | E.g. hospital formulary pharmacy contact (name, date)                                                                                                                                                  | Form 4.2      |
| <input type="checkbox"/> | demerol              | Synthetic opiate (phenylpiperidine)                                                                                                                                |        |  | E.g. hospital formulary pharmacy contact (name, date)                                                                                                                                                  | Form 4.2      |
| <input type="checkbox"/> | fentanyl             | Synthetic opiate                                                                                                                                                   |        |  | E.g. hospital formulary pharmacy contact (name, date)                                                                                                                                                  | Form 4.2      |
| <input type="checkbox"/> | oxycodone            | Synthetic opiate                                                                                                                                                   |        |  | E.g. hospital formulary pharmacy contact (name, date)                                                                                                                                                  | Form 4.2      |
| <input type="checkbox"/> | percocets            | Synthetic opiate                                                                                                                                                   |        |  | E.g. hospital formulary pharmacy contact (name, date)                                                                                                                                                  | Form 4.2      |
|                          | Laboratory testing   |                                                                                                                                                                    |        |  |                                                                                                                                                                                                        |               |
| <input type="checkbox"/> | complete blood count | A complete blood count gives important information about the kinds and numbers of cells in the blood, especially red blood cells, white blood cells and platelets. | 1 test |  | E.g. BC Health Guide Complete Blood Count (CBC): <a href="http://www.bchealthguide.org/kbase/topic/medtest/hw4260/descrip.htm">http://www.bchealthguide.org/kbase/topic/medtest/hw4260/descrip.htm</a> | Form 4.1 & 14 |



|   |                          |                    |                                                                                                                                                                                                                                                                                                                                                     |           |  |                                                                                                                                                                                                                                                                                  |                              |
|---|--------------------------|--------------------|-----------------------------------------------------------------------------------------------------------------------------------------------------------------------------------------------------------------------------------------------------------------------------------------------------------------------------------------------------|-----------|--|----------------------------------------------------------------------------------------------------------------------------------------------------------------------------------------------------------------------------------------------------------------------------------|------------------------------|
| 1 | <input type="checkbox"/> | creatinine         | Creatinine tests measure the level of the waste product creatinine in your blood and urine.                                                                                                                                                                                                                                                         | 1 test    |  | E.g. BC Health Guide Creatinine and Creatinine Clearance <a href="http://www.bchealthguide.org/kbase/topic/medtest/hw4322/descrip.htm">http://www.bchealthguide.org/kbase/topic/medtest/hw4322/descrip.htm</a>                                                                   | Form 14                      |
| 2 | <input type="checkbox"/> | arterial blood gas | "An arterial blood gas (ABG) test measures the acidity (pH) and the levels of oxygen (PO <sub>2</sub> ) and carbon dioxide (PCO <sub>2</sub> ), bicarbonate (HCO <sub>3</sub> ), and oxygen saturation in the blood."                                                                                                                               | 1 test    |  | E.g. BC Health Guide Arterial Blood Gases: <a href="http://www.bchealthguide.org/kbase/topic/medtest/hw2343/descrip.htm">http://www.bchealthguide.org/kbase/topic/medtest/hw2343/descrip.htm</a> Ministry of Health and Long Term Care Schedule of Benefits: Laboratory Services | Form 9.2                     |
| 3 | <input type="checkbox"/> | lactate            | "A lactic acid test is a blood test that measures the level of lactic acid made in the body. Most of it is made by muscle tissue and red blood cells. When the oxygen level in the body is normal, carbohydrate breaks down into water and carbon dioxide. When the oxygen level is low, carbohydrate breaks down for energy and makes lactic acid" | 1 test    |  | E.g. BC Health Guide Lactate: <a href="https://www.healthlinkbc.ca/medicaltests/hw7871">https://www.healthlinkbc.ca/medicaltests/hw7871</a> Ministry of Health and Long Term Care Schedule of Benefits: Laboratory Services                                                      | Form 11.1 & 14               |
| 4 | <input type="checkbox"/> | albumin            | "Albumin is a protein that is produced in the liver and released into the blood. It helps prevent blood from leaking out of blood vessels, carries medicines and other substances through the blood, and is important for tissue growth and healing."                                                                                               | 1 test    |  | E.g. BC Health Guide Albumin: <a href="https://www.healthlinkbc.ca/health-topics/tv7859">https://www.healthlinkbc.ca/health-topics/tv7859</a> Ministry of Health and Long Term Care Schedule of Benefits: Laboratory Services                                                    | Form 14                      |
| 5 | <input type="checkbox"/> | blood cultures     | "A blood culture is a test on a sample of blood to check for bacteria, a fungus, or sometimes viruses in the bloodstream. The test may be done if a doctor suspects a blood infection. A blood culture may help determine the specific organism causing an infection and select the appropriate                                                     | 1 culture |  | E.g. BC Health Guide Blood Cultures: <a href="https://www.healthlinkbc.ca/healthtopics/stb117065">https://www.healthlinkbc.ca/healthtopics/stb117065</a> Ministry of Health and Long Term Care Schedule of Benefits: Laboratory Services                                         | Form 4.3, 4B, 8.1 & 9.2 & 10 |
| 6 |                          |                    | antibiotic to treat it."                                                                                                                                                                                                                                                                                                                            |           |  |                                                                                                                                                                                                                                                                                  |                              |
| 7 | <input type="checkbox"/> | urine cultures     | "A urine culture is a test to find germs (such as bacteria) in the urine that can cause an infection. Urine in the bladder is normally sterile. This means it does not contain any bacteria or other organisms (such as fungi). But bacteria can enter the urethra and cause a urinary tract infection (UTI)."                                      | 1 culture |  | E.g. BC Health Guide Urine Cultures: <a href="https://www.healthlinkbc.ca/medicaltests/hw5973">https://www.healthlinkbc.ca/medicaltests/hw5973</a> Ministry of Health and Long Term Care Schedule of Benefits: Laboratory Services                                               | Form 4.3, 4B, 8.1, 12        |

|                                                          |                                                                                                                                                                                                                                                                                                                                                                                                                                                                                                                                                                                                |           |  |                                                                                                                                                                                                                                                                                                      |                        |
|----------------------------------------------------------|------------------------------------------------------------------------------------------------------------------------------------------------------------------------------------------------------------------------------------------------------------------------------------------------------------------------------------------------------------------------------------------------------------------------------------------------------------------------------------------------------------------------------------------------------------------------------------------------|-----------|--|------------------------------------------------------------------------------------------------------------------------------------------------------------------------------------------------------------------------------------------------------------------------------------------------------|------------------------|
| □ sputum cultures                                        | "Sputum is a thick fluid made in the lungs and in the airways leading to the lungs. A sputum culture is a test to find germs (such as bacteria or a fungus) that can cause an infection. A sample of sputum is added to a substance that promotes the growth of germs. If no germs grow, the culture is negative. If germs that can cause infection grow, the culture is positive. The type of germ may be identified using a microscope or chemical tests. Sometimes other tests are done to find the right medicine for treating the infection. This is called <u>sensitivity testing</u> ." | 1 culture |  | E.g. BC Health Guide Sputum Cultures:<br><a href="https://www.healthlinkbc.ca/medicaltests/hw5693">https://www.healthlinkbc.ca/medicaltests/hw5693</a><br>Ministry of Health and Long Term Care<br>Schedule of Benefits:<br>Laboratory Services                                                      | Form 4.3, 4B , 8.1, 9  |
| □ tracheal aspirate                                      | See sputum cultures                                                                                                                                                                                                                                                                                                                                                                                                                                                                                                                                                                            | 1 culture |  | E.g. BC Health Guide Sputum Cultures:<br><a href="https://www.healthlinkbc.ca/medicaltests/hw5693">https://www.healthlinkbc.ca/medicaltests/hw5693</a><br>Ministry of Health and Long Term Care<br>Schedule of Benefits:<br>Laboratory Services                                                      | Form 4.3, 4B , 8.1, 9  |
| □ bronchoalveolar lavage cultures                        | Bronchoscopy is a procedure that allows your doctor to look at your airway through a thin viewing instrument called a bronchoscope. During a bronchoscopy, your doctor will examine your throat, larynx, trachea, and lower airways. (See sputum cultures)                                                                                                                                                                                                                                                                                                                                     | 1 culture |  | E.g. BC Health Guide Bronchoscopy/Sputum Cultures:<br><a href="https://www.healthlinkbc.ca/medicaltests/hw200474">https://www.healthlinkbc.ca/medicaltests/hw200474</a><br>Ministry of Health and Long Term Care<br>Schedule of Benefits:<br>Laboratory Services                                     | Form 4.3, 4B , 8.1, 9  |
| □ <i>C. difficile</i> polymerase chain reaction (PCR)    | <i>C. difficile</i> , also known as <i>C.diff</i> , are bacteria that live in the bowel of up to 7% of people without causing illness. Your intestines also normally contain many good bacteria that help you digest food and stay healthy. When antibiotics are taken to treat an illness, these good bacteria may be killed. <i>C.diff bacteria</i> are not killed by common antibiotics and continue to grow, which may cause you to become sick.                                                                                                                                           | 1 test    |  | E.g. BC Health Guide <i>C. Difficile</i> :<br><a href="https://www.healthlinkbc.ca/healthlinkbcfiles/clostridium-difficile">https://www.healthlinkbc.ca/healthlinkbcfiles/clostridium-difficile</a> Ministry of Health and Long Term Care<br>Schedule of Benefits:<br>Laboratory Services            | Form 4.3, 4B , 8.1, 14 |
| □ <i>C. difficile</i> toxin assays                       | <i>C. diff</i> produces toxins that can cause damage to the cells in the intestines. The most common symptom of <i>C.diff infection</i> is diarrhea. In fact, it is the most frequent cause of infectious diarrhea in hospitals and health care facilities. <i>C. diff</i> infections may lead to serious illness.                                                                                                                                                                                                                                                                             | 1 test    |  | E.g. BC Health Guide <i>C. Difficile</i> toxin assay:<br><a href="https://www.healthlinkbc.ca/healthlinkbcfiles/clostridium-difficile">https://www.healthlinkbc.ca/healthlinkbcfiles/clostridium-difficile</a> Ministry of Health and Long Term Care<br>Schedule of Benefits:<br>Laboratory Services | Form 4.3, 4B , 8.1,14  |
| □ <i>C. difficile</i> ELISA (enzyme-linked immunosorbent | Antisera against Clostridium difficile toxin B were prepared in sheep and rabbit and were used in indirect                                                                                                                                                                                                                                                                                                                                                                                                                                                                                     | 1 test    |  | E.g. <i>C. Difficile</i> ELISA:<br><a href="https://www.ncbi.nlm.nih.gov/pubmed/2325114">https://www.ncbi.nlm.nih.gov/pubmed/2325114</a>                                                                                                                                                             | Form 4.3, 4B , 8.1, 14 |

|                                                                                            |                                                                                                                                                                                                                                                                                                                                                                                                                                                                                                                                                                                                                                                                                                                                                                                                                                              |        |  |                                                                                                                                                                                                                                                               |                        |
|--------------------------------------------------------------------------------------------|----------------------------------------------------------------------------------------------------------------------------------------------------------------------------------------------------------------------------------------------------------------------------------------------------------------------------------------------------------------------------------------------------------------------------------------------------------------------------------------------------------------------------------------------------------------------------------------------------------------------------------------------------------------------------------------------------------------------------------------------------------------------------------------------------------------------------------------------|--------|--|---------------------------------------------------------------------------------------------------------------------------------------------------------------------------------------------------------------------------------------------------------------|------------------------|
| assay)                                                                                     | and sandwich enzyme-linked immunosorbent assays (ELISA) for the detection of toxin B. Polyvinyl chloride and polystyrene microtitration plates were tested as solid phases for the assay. Both assays had a lower limit of detection for toxin B of 1 ng/ml. They were used to detect the presence of toxin B in 210 human faecal specimens and also in the culture supernatant fluids of <i>C. difficile</i> strains isolated from the faecal samples. There was a close correlation between the results of sandwich ELISA and those of cytotoxicity tests and isolation of <i>C. difficile</i> . Our sandwich ELISA method seems to be useful as a presumptive test for detection of <i>C. difficile</i> toxin B                                                                                                                           |        |  |                                                                                                                                                                                                                                                               |                        |
| <input type="checkbox"/> <i>C. difficile</i> cell culture                                  | Cell culture cytotoxicity is performed by using a fibroblast cell line in a microtiter format read at 4 h, 24 h, and 48 h from a stool sample for <i>C. Difficile</i> .                                                                                                                                                                                                                                                                                                                                                                                                                                                                                                                                                                                                                                                                      | 1 test |  | E.g. <i>C. Difficile</i> cell culture<br><a href="https://www.ncbi.nlm.nih.gov/pubmed/10764962?dopt=Abstract">https://www.ncbi.nlm.nih.gov/pubmed/10764962?dopt=Abstract</a>                                                                                  | Form 4.3, 4B , 8.1, 14 |
| <input type="checkbox"/> <i>C. difficile</i> LAMP (loop mediated isothermal amplification) | <i>Clostridium difficile</i> infection (CDI) remains a diagnostic challenge for clinicians. More recently, loopmediated isothermal amplification (LAMP) has become readily available for the diagnosis of CDI, and many studies have investigated the usefulness of LAMP for rapid and accurate diagnosis of CDI.                                                                                                                                                                                                                                                                                                                                                                                                                                                                                                                            | 1 test |  | E.g. <i>Clostridium difficile</i> LAMP:<br><a href="https://www.ncbi.nlm.nih.gov/pmc/articles/PMC4624739/">https://www.ncbi.nlm.nih.gov/pmc/articles/PMC4624739/</a>                                                                                          | Form 4.3, 4B , 8.1, 14 |
| <input type="checkbox"/> anaerobic cultures                                                | A culture is a test to find germs (such as bacteria or a fungus) that can cause an infection. A sensitivity test checks to see what kind of medicine, such as an antibiotic, will work best to treat the illness or infection. For a culture, a sample of body fluid or tissue is added to a substance that promotes the growth of germs. If no germs grow, the culture is negative. If germs that can cause infection grow, the culture is positive. The type of germ may be identified using a microscope or chemical tests. Bacteria usually grow quickly in a culture (2 days), while other types of organisms, such as a fungus, can take longer. A culture and sensitivity test may be done on many different body fluids, such as urine, mucus, blood, pus, saliva, breast milk, spinal fluid, or discharge from the vagina or penis. | 1 test |  | E.g. BC Health Guide Culture and Sensitivity:<br><a href="https://www.healthlinkbc.ca/healthtopics/stc123799">https://www.healthlinkbc.ca/healthtopics/stc123799</a><br>Ministry of Health and Long Term Care<br>Schedule of Benefits:<br>Laboratory Services | Form 4.3, 4B , 8.1, 11 |

|                                                     |                                                                                                                                                                                                                                                                                                                                                                                                                                                                                                                                                                                                                                                                                                                                                                                                                                               |           |  |                                                                                                                                                                                                                                                   |                        |
|-----------------------------------------------------|-----------------------------------------------------------------------------------------------------------------------------------------------------------------------------------------------------------------------------------------------------------------------------------------------------------------------------------------------------------------------------------------------------------------------------------------------------------------------------------------------------------------------------------------------------------------------------------------------------------------------------------------------------------------------------------------------------------------------------------------------------------------------------------------------------------------------------------------------|-----------|--|---------------------------------------------------------------------------------------------------------------------------------------------------------------------------------------------------------------------------------------------------|------------------------|
| <input type="checkbox"/> aerobic cultures           | A culture is a test to find germs (such as bacteria or a fungus) that can cause an infection. A sensitivity test checks to see what kind of medicine, such as an antibiotic, will work best to treat the illness or infection. For a culture, a sample of body fluid or tissue is added to a                                                                                                                                                                                                                                                                                                                                                                                                                                                                                                                                                  | 1 culture |  | E.g. BC Health Guide Culture and Sensitivity: <a href="https://www.healthlinkbc.ca/healthtopics/stc123799">https://www.healthlinkbc.ca/healthtopics/stc123799</a> Ministry of Health and Long Term Care Schedule of Benefits: Laboratory Services | Form 4.3, 4B , 8.1, 11 |
|                                                     | substance that promotes the growth of germs. If no germs grow, the culture is negative. If germs that can cause infection grow, the culture is positive. The type of germ may be identified using a microscope or chemical tests. Bacteria usually grow quickly in a culture (2 days), while other types of organisms, such as a fungus, can take longer.                                                                                                                                                                                                                                                                                                                                                                                                                                                                                     |           |  |                                                                                                                                                                                                                                                   |                        |
| <input type="checkbox"/> thoracentesis              | Thoracentesis is a procedure to remove fluid from the space between the lungs and the chest wall called the pleural space. It is done with a needle (and sometimes a plastic catheter) inserted through the chest wall. Ultrasound pictures are often used to guide the placement of the needle. This pleural fluid may be sent to a lab to determine what may be causing the fluid to build up in the pleural space. Normally only a small amount of pleural fluid is present in the pleural space. A buildup of excess pleural fluid (pleural effusion) may be caused by many conditions, such as infection, inflammation, heart failure, or cancer. If a large amount of fluid is present, it may be hard to breathe. Fluid inside the pleural space may be found during a physical examination and is usually confirmed by a chest X-ray. | 1 culture |  | E.g. BC Health Guide Thoracentesis: <a href="https://www.healthlinkbc.ca/medicaltests/hw233202">https://www.healthlinkbc.ca/medicaltests/hw233202</a> Ministry of Health and Long Term Care Schedule of Benefits: Laboratory Services             | Form 4.3, 4B , 8.1, 9  |
| <input type="checkbox"/> paracentesis               | Paracentesis is a procedure to take out fluid that has collected in the belly (peritoneal fluid). This fluid buildup is called ascites. Ascites may be caused by infection, inflammation, an injury, or other conditions, such as cirrhosis or cancer. The fluid is taken out using a long, thin needle put through the belly. The fluid is sent to a lab and studied to find the cause of the fluid buildup. Paracentesis also may be done to take the fluid out to relieve belly pressure or pain in people with cancer or cirrhosis.                                                                                                                                                                                                                                                                                                       | 1 culture |  | E.g. BC Health Guide Paracentesis: <a href="https://www.healthlinkbc.ca/medicaltests/hw198220">https://www.healthlinkbc.ca/medicaltests/hw198220</a> Ministry of Health and Long Term Care Schedule of Benefits: Laboratory Services              | Form 4.3, 4B , 8.1, 11 |
| Personnel ( <i>per diem</i> or <i>hourly wage</i> ) |                                                                                                                                                                                                                                                                                                                                                                                                                                                                                                                                                                                                                                                                                                                                                                                                                                               |           |  |                                                                                                                                                                                                                                                   |                        |

|                  |                                                                                                                                                                                                                                                                                                                                                                                                                                                                                                                                                                                                                                                                                                                                         |                                                              |  |                                                                                                                                                 |        |
|------------------|-----------------------------------------------------------------------------------------------------------------------------------------------------------------------------------------------------------------------------------------------------------------------------------------------------------------------------------------------------------------------------------------------------------------------------------------------------------------------------------------------------------------------------------------------------------------------------------------------------------------------------------------------------------------------------------------------------------------------------------------|--------------------------------------------------------------|--|-------------------------------------------------------------------------------------------------------------------------------------------------|--------|
| □ ICU            | First day of Comprehensive Care rendered by "an Intensive Care physician who provides both Critical Care and Ventilation Support to patients in the Intensive Care Area. The service includes initial consultation and assessment and subsequent examinations, often including comprehensive critical care procedures such as endotracheal intubation, tracheal toilet, artificial ventilation and all necessary measures for respiratory support, emergency resuscitation, insertion of intravenous lines, cutdowns, intraosseous infusion, arterial and/or venous catheters pressure infusion set and pharmacological agents, insertion                                                                                               | First episode/first day<br><br>Daily rate (Day 2-30)         |  | E.g. Ontario Ministry of Health and Long Term Care Schedule of Benefits: Physician Services. Similar definitions exist for other jurisdictions. | Form 3 |
|                  | of C.V.P lines, defibrillation, cardioversion and usual resuscitative measures, insertion of urinary catheters and nasogastric intubation with or without anaesthesia, securing and interpretation of blood gases and laboratory tests, oximetry, transcutaneous blood gases, intracranial pressure monitoring interpretation and assessment when indicated (excluding insertion of I.C.P. measuring device)."<br><br>Fee that is reimbursed to an Intensive Care physician for Comprehensive Care as defined above for a patient's hospitalization from day 2 to 30 inclusive.                                                                                                                                                         |                                                              |  |                                                                                                                                                 |        |
| □ Ward physician | "Admission assessment is a general assessment rendered to a patient on admission" to a longterm care institution: nonemergency inpatient services, including chronic care hospitals<br><br>Fee that is reimbursed to a physician for services to a patient in chronic care or convalescent hospital during the "First 4 subsequent visits... per month". "A subsequent visit is any routine assessment following the patient's admission to a long-term care institution."<br>Fee that is reimbursed to the Most Responsible Physician at the day of discharge for rendering a subsequent visit. Completion of discharge summary by the physician within 48 hours of discharge, arrangement for followup of patient and prescription of | First episode/first day.<br><br>Daily rate.<br><br>Last day. |  | E.g. Ontario Ministry of Health and Long Term Care Schedule of Benefits: Physician Services. Similar definitions exist for other jurisdictions. | Form 3 |

|                                                                                                                                                          |                                                                                                                                                                                     |                          |  |                                                                                                                                                                                                                                                                                                                                                                                                                                                                                                                                |        |
|----------------------------------------------------------------------------------------------------------------------------------------------------------|-------------------------------------------------------------------------------------------------------------------------------------------------------------------------------------|--------------------------|--|--------------------------------------------------------------------------------------------------------------------------------------------------------------------------------------------------------------------------------------------------------------------------------------------------------------------------------------------------------------------------------------------------------------------------------------------------------------------------------------------------------------------------------|--------|
| <input type="checkbox"/> consultation physicians (i.e. general surgery, thoracic surgery, gastroenterology, infectious disease specialists, respirology) | "Admission assessment is a general assessment rendered to a patient on admission" to a longterm care institution: nonemergency inpatient services, including chronic care hospitals | First episode/first day. |  | E.g. Ontario Ministry of Health and Long Term Care Schedule of Benefits: Physician Services. Similar definitions exist for other jurisdictions.                                                                                                                                                                                                                                                                                                                                                                                | Form 3 |
| <input type="checkbox"/> nursing                                                                                                                         | Provide direct nursing care to patients, deliver health education programs and provide consultative services regarding issues relevant to the practice of nursing.                  | Hourly wage              |  | E.g. Service Canada-Labour Market Information- Job Descriptions. Similar definitions exist for other jurisdictions.<br><a href="http://www.labourmarketinformation.ca/standard.asp?ppid=82&amp;lcode=E&amp;prov=1&amp;qaid=1&amp;occ=3214&amp;job=&amp;search_key=1&amp;search_type=&amp;employer_potential=&amp;new_search=">http://www.labourmarketinformation.ca/standard.asp?ppid=82&amp;lcode=E&amp;prov=1&amp;qaid=1&amp;occ=3214&amp;job=&amp;search_key=1&amp;search_type=&amp;employer_potential=&amp;new_search=</a> | Form 3 |
| <input type="checkbox"/> pharmacist                                                                                                                      | Compound and dispense prescribed pharmaceuticals and provide consultative services to both clients and health care providers.                                                       | Hourly wage              |  | E.g. Service Canada-Labour Market Information- Job Descriptions. Similar definitions exist for other jurisdictions.                                                                                                                                                                                                                                                                                                                                                                                                            | Form 3 |

|                                                |                                                                                                                                           |             |  |                                                                                                                                                                                                                                                                                                                                                                                                                                                                                                                                |        |
|------------------------------------------------|-------------------------------------------------------------------------------------------------------------------------------------------|-------------|--|--------------------------------------------------------------------------------------------------------------------------------------------------------------------------------------------------------------------------------------------------------------------------------------------------------------------------------------------------------------------------------------------------------------------------------------------------------------------------------------------------------------------------------|--------|
|                                                |                                                                                                                                           |             |  | <a href="http://www.labourmarketinformation.ca/standard.asp?ppid=82&amp;lcode=E&amp;prov=1&amp;qaid=1&amp;occ=3214&amp;job=&amp;search_key=1&amp;search_type=&amp;employer_potential=&amp;new_search=">http://www.labourmarketinformation.ca/standard.asp?ppid=82&amp;lcode=E&amp;prov=1&amp;qaid=1&amp;occ=3214&amp;job=&amp;search_key=1&amp;search_type=&amp;employer_potential=&amp;new_search=</a>                                                                                                                        |        |
| <input type="checkbox"/> respiratory therapist | Respiratory therapists assist physicians in the diagnosis, treatment and care of patients with respiratory and cardiopulmonary disorders. | Hourly wage |  | E.g. Service Canada-Labour Market Information- Job Descriptions. Similar definitions exist for other jurisdictions.<br><a href="http://www.labourmarketinformation.ca/standard.asp?ppid=82&amp;lcode=E&amp;prov=1&amp;qaid=1&amp;occ=3214&amp;job=&amp;search_key=1&amp;search_type=&amp;employer_potential=&amp;new_search=">http://www.labourmarketinformation.ca/standard.asp?ppid=82&amp;lcode=E&amp;prov=1&amp;qaid=1&amp;occ=3214&amp;job=&amp;search_key=1&amp;search_type=&amp;employer_potential=&amp;new_search=</a> | Form 3 |

|                              |                                                                                                                                                                                                                                      |             |  |                                                                                                                                                                                                                                                                                                                                                                                                                                                                                                                                                                                  |        |
|------------------------------|--------------------------------------------------------------------------------------------------------------------------------------------------------------------------------------------------------------------------------------|-------------|--|----------------------------------------------------------------------------------------------------------------------------------------------------------------------------------------------------------------------------------------------------------------------------------------------------------------------------------------------------------------------------------------------------------------------------------------------------------------------------------------------------------------------------------------------------------------------------------|--------|
| □ physical therapist         | Assess patients and plan and carry out individually designed treatment programs to maintain,                                                                                                                                         | Hourly wage |  | E.g. Service Canada-Labour Market Information-Job Descriptions. Similar definitions exist for other jurisdictions.<br><a href="http://www.labourmarketinformation.ca/standard.asp?ppid=82&amp;lcode=E&amp;prov=1&amp;qaid=1&amp;occ=3214&amp;job=&amp;search_key=1&amp;search_type=&amp;employer_potential=&amp;new_search=">http://www.labourmarketinformation.ca/standard.asp?ppid=82&amp;lcode=E&amp;prov=1&amp;qaid=1&amp;occ=3214&amp;job=&amp;search_key=1&amp;search_type=&amp;employer_potential=&amp;new_search=</a> Similar definitions exist for other jurisdictions. | Form 3 |
| □ social work                | Help individuals, couples, families, groups, communities and organizations develop the skills and resources they need to enhance social functioning and provide counseling, therapy and referral to other supportive social services | Hourly wage |  | E.g. Service Canada-Labour Market Information-Job Descriptions. Similar definitions exist for other jurisdictions.<br><a href="http://www.labourmarketinformation.ca/standard.asp?ppid=82&amp;lcode=E&amp;prov=1&amp;qaid=1&amp;occ=3214&amp;job=&amp;search_key=1&amp;search_type=&amp;employer_potential=&amp;new_search=">http://www.labourmarketinformation.ca/standard.asp?ppid=82&amp;lcode=E&amp;prov=1&amp;qaid=1&amp;occ=3214&amp;job=&amp;search_key=1&amp;search_type=&amp;employer_potential=&amp;new_search=</a> Similar definitions exist for other jurisdictions. | Form 3 |
| □ unit clerk/clerical worker | Medical secretaries perform a variety of secretarial and administrative duties in doctor's offices, hospitals, medical clinics and other medical settings.                                                                           | Hourly wage |  | E.g. Service Canada-Labour Market Information-Job Descriptions. Similar definitions exist for other jurisdictions.<br><a href="http://www.labourmarketinformation.ca/standard.asp?ppid=82&amp;lcode=E&amp;prov=1&amp;qaid=1&amp;occ=3214&amp;job=&amp;search_key=1&amp;search_type=&amp;employer_potential=&amp;new_search=">http://www.labourmarketinformation.ca/standard.asp?ppid=82&amp;lcode=E&amp;prov=1&amp;qaid=1&amp;occ=3214&amp;job=&amp;search_key=1&amp;search_type=&amp;employer_potential=&amp;new_search=</a> Similar definitions exist                          |        |

|                                                                              |                                                                                                                                                                |        |  |                                                                                                                                                                                                                                                                                                |                    |
|------------------------------------------------------------------------------|----------------------------------------------------------------------------------------------------------------------------------------------------------------|--------|--|------------------------------------------------------------------------------------------------------------------------------------------------------------------------------------------------------------------------------------------------------------------------------------------------|--------------------|
|                                                                              |                                                                                                                                                                |        |  | for other jurisdictions.                                                                                                                                                                                                                                                                       |                    |
| Radiology                                                                    |                                                                                                                                                                |        |  |                                                                                                                                                                                                                                                                                                |                    |
| □ portable chest or abdominal radiographs                                    | The chest/abdominal x-ray, performed portably at the patient's bedside, in the ICU or ward, usually performed as one film, in the anterior-posterior position. | 1 test |  | E.g. Chest X-ray (Radiography):<br><a href="http://www.radiologyinfo.org/en/info.cfm?pg=chestrad&amp;bhcp=1">http://www.radiologyinfo.org/en/info.cfm?pg=chestrad&amp;bhcp=1</a>                                                                                                               | Form 9, 11, 14     |
| □ computerized tomography (CT) scan: chest, abdomen, pelvis, sinusitis, head | Computed tomography of the chest, abdomen, pelvis or sinuses/head, to diagnose infections                                                                      | 1 test |  | E.g. Radiology Info (Web site developed and funded by: American College of Radiology (ACR) and Radiological Society of North America (RSNA))<br>CT Angiography (CTA):<br><a href="http://www.radiologyinfo.org/en/info.cfm?pg=angiact">http://www.radiologyinfo.org/en/info.cfm?pg=angiact</a> | Form 9, 11, 14, 20 |

|                                                                                  |                                                                 |                                                                                                                                                                                                                                                                                                                                                                                                                                              |                           |  |                                                                                                                                                                                                                                                      |             |
|----------------------------------------------------------------------------------|-----------------------------------------------------------------|----------------------------------------------------------------------------------------------------------------------------------------------------------------------------------------------------------------------------------------------------------------------------------------------------------------------------------------------------------------------------------------------------------------------------------------------|---------------------------|--|------------------------------------------------------------------------------------------------------------------------------------------------------------------------------------------------------------------------------------------------------|-------------|
| 1<br>2<br>3<br>4<br>5<br>6<br>7<br>8<br>9<br>10<br>11<br>12<br>13<br>14          | <input type="checkbox"/> MRI: head, chest, joint                | Magnetic resonance imaging (MRI) is a test that uses a magnetic field and pulses of radio wave energy to make pictures of organs and structures that are inside the body. During the MRI test (also called an MRI scan), you usually lie on your back on a table that is part of the MRI scanner. Your head, chest, and arms may be held with straps to help you stay still. The table will then slide into the round opening of the magnet. | 1 test                    |  | E.g. BC Health Guide MRI:<br><a href="https://www.healthlinkbc.ca/healthtopics/zm6243">https://www.healthlinkbc.ca/healthtopics/zm6243</a><br>Ministry of Health and Long Term Care<br>Schedule of Benefits:<br>Laboratory Services                  | Form 20     |
| 15<br>16<br>17<br>18<br>19<br>20                                                 | <input type="checkbox"/> abdominal ultrasound                   | An abdominal ultrasound takes pictures of the organs and other structures in your upper belly. It uses sound waves to show images on a screen.                                                                                                                                                                                                                                                                                               | 1 test                    |  | E.g. BC Health Guide Abdominal Ultrasound:<br><a href="https://www.healthlinkbc.ca/medicaltests/hw1430">https://www.healthlinkbc.ca/medicaltests/hw1430</a><br>Ministry of Health and Long Term Care<br>Schedule of Benefits:<br>Laboratory Services | Form 11, 20 |
| 21                                                                               | Procedural costs:                                               |                                                                                                                                                                                                                                                                                                                                                                                                                                              |                           |  |                                                                                                                                                                                                                                                      |             |
| 22<br>23<br>24<br>25<br>26                                                       | <input type="checkbox"/> central venous catheter                | Insertion of an intravenous catheter for administration of fluid or measurement of pressures, to a central vein (internal jugular, femoral, subclavian sites).                                                                                                                                                                                                                                                                               | 1 item and/or 1 procedure |  | E.g. Ministry of Health and Long Term Care<br>Schedule of Benefits:<br>Physician Services<br>Similar definitions exist for other jurisdictions.                                                                                                      | Form 10     |
| 27<br>28<br>29<br>30                                                             | <input type="checkbox"/> peripherally inserted central catheter | Insertion of an intravenous catheter for administration of fluid or measurement of pressures, to a peripheral vein                                                                                                                                                                                                                                                                                                                           | 1 item and/or 1 procedure |  | E.g. Ministry of Health and Long Term Care<br>Schedule of Benefits:<br>Physician Services<br>Similar definitions exist for other jurisdictions.                                                                                                      | Form 10     |
| 31<br>32<br>33<br>34<br>35                                                       | <input type="checkbox"/> dialysis catheter                      | See central venous catheter                                                                                                                                                                                                                                                                                                                                                                                                                  | 1 item and/or 1 procedure |  | E.g. Ministry of Health and Long Term Care<br>Schedule of Benefits:<br>Physician Services<br>Similar definitions exist for other jurisdictions.                                                                                                      | Form 10     |
| 36<br>37<br>38<br>39<br>40                                                       | <input type="checkbox"/> arterial lines                         | Insertion of an intravenous catheter for administration of fluid or measurement of pressures, to a artery                                                                                                                                                                                                                                                                                                                                    | 1 item and/or 1 procedure |  | E.g. Ministry of Health and Long Term Care<br>Schedule of Benefits:<br>Physician Services<br>Similar definitions exist for other jurisdictions.                                                                                                      | Form 10     |
| 41<br>42<br>43<br>44                                                             | <input type="checkbox"/> chest tube                             | Thoracostomy tube for drainage of pleural cavity                                                                                                                                                                                                                                                                                                                                                                                             | 1 item and/or 1 procedure |  | E.g. Ministry of Health and Long Term Care<br>Schedule of Benefits:<br>Physician Services<br>Similar definitions exist for other jurisdictions.                                                                                                      | Form 9.1    |
| 45<br>46                                                                         | <input type="checkbox"/> naso- or oro-gastric tube              | Feeding tube (inserted through nose or mouth)                                                                                                                                                                                                                                                                                                                                                                                                | 1 item and/or 1 procedure |  | E.g. Ministry of Health and Long Term Care                                                                                                                                                                                                           | Form 4.2    |
| 47<br>48<br>49<br>50<br>51<br>52<br>53<br>54<br>55<br>56<br>57<br>58<br>59<br>60 |                                                                 |                                                                                                                                                                                                                                                                                                                                                                                                                                              |                           |  | Schedule of Benefits:<br>Physician Services<br>Similar definitions exist for other jurisdictions.                                                                                                                                                    |             |



|                                                                                  |                                                                         |                                                                                                                                                                                                                                                                                                                                                                                                                                                                                                                                                                                                                                    |                           |  |                                                                                                                                                                                                                                                      |                           |
|----------------------------------------------------------------------------------|-------------------------------------------------------------------------|------------------------------------------------------------------------------------------------------------------------------------------------------------------------------------------------------------------------------------------------------------------------------------------------------------------------------------------------------------------------------------------------------------------------------------------------------------------------------------------------------------------------------------------------------------------------------------------------------------------------------------|---------------------------|--|------------------------------------------------------------------------------------------------------------------------------------------------------------------------------------------------------------------------------------------------------|---------------------------|
| 1<br>2<br>3<br>4<br>5<br>6<br>7<br>8<br>9                                        | <input type="checkbox"/> percutaneous endoscopic gastrostomy (PEG) tube | Feeding tube inserted into through the abdominal wall into the stomach                                                                                                                                                                                                                                                                                                                                                                                                                                                                                                                                                             | 1 item and/or 1 procedure |  | E.g. Ministry of Health and Long Term Care Schedule of Benefits: Physician Services<br>Similar definitions exist for other jurisdictions.                                                                                                            | Form 4.2                  |
| 10<br>11<br>12                                                                   | <input type="checkbox"/> tube feed                                      | Liquid enteral nutrition administered through a feeding tube                                                                                                                                                                                                                                                                                                                                                                                                                                                                                                                                                                       | 1 item and/or 1 procedure |  | E.g. hospital formulary pharmacy contact (name, date)<br>Similar definitions exist for other jurisdictions.                                                                                                                                          | Form 4.2                  |
| 13<br>14<br>15<br>16<br>17<br>18<br>19<br>20<br>21<br>22<br>23<br>24<br>25<br>26 | <input type="checkbox"/> fiber                                          | Fibre includes all parts of plant foods that your body can't digest or absorb. Fibre is also known as roughage or bulk. Insoluble fibre helps promote regularity and a healthy digestive system. You get this type of fibre from wheat bran, whole grains, and some vegetables. Soluble fibre helps lower blood cholesterol levels and control blood sugar levels. You get this type of fibre from oats, barley, psyllium, oranges, dried beans and lentils. A high fibre diet may also help prevent colon cancer. Eating high fibre foods may help you feel full for a longer time, which helps with appetite and weight control. | 1 item and/or 1 procedure |  | E.g. hospital formulary pharmacy contact (name, date)<br>Similar definitions exist for other jurisdictions.                                                                                                                                          | Form 4.2                  |
| 27<br>28<br>29<br>30<br>31<br>32<br>33<br>34<br>35<br>36<br>37<br>38             | <input type="checkbox"/> protein supplement                             | Protein is composed of various types of amino acids, provides the raw material for muscle construction and repair, as well as playing an important role in the immune system, the endocrine (hormone production) system, and the transmission of nerve impulses throughout the nervous system. A supplement is any addition to a patient's regular diet to achieve a particular nutritional goal; a supplement may be a natural or a synthetic product. Supplements are available in fluid, powder, and solid food formulations.                                                                                                   | 1 item and/or 1 procedure |  | E.g. hospital formulary pharmacy contact (name, date)<br>Similar definitions exist for other jurisdictions.                                                                                                                                          | Form 4.2                  |
| 39<br>40<br>41<br>42<br>43<br>44                                                 | <input type="checkbox"/> ventilator circuit changes                     | Ventilator circuit refers to the tubing that connects the ventilator to the patient, as well as any devices that might be connected to the circuit. Routine changes of this circuit vary from jurisdiction to jurisdiction                                                                                                                                                                                                                                                                                                                                                                                                         | 1 item and/or 1 procedure |  | <a href="https://www.ncbi.nlm.nih.gov/pubmed/20406515">https://www.ncbi.nlm.nih.gov/pubmed/20406515</a><br>E.g. Ministry of Health and Long Term Care Schedule of Benefits: Physician Services<br>Similar definitions exist for other jurisdictions. | PROSPECT Site Information |
| 45<br>46<br>47<br>48<br>49<br>50<br>51<br>52                                     | <input type="checkbox"/> endotracheal tubes (with subglottic suction)   | An endotracheal tube is a flexible plastic tube that is placed through the mouth into the trachea (windpipe) to help a patient breathe. The endotracheal tube is then connected to a ventilator, which delivers oxygen to the lungs. Subglottic suctioning capabilities help remove secretions below the glottis, and help reduce ventilator-associated pneumonia                                                                                                                                                                                                                                                                  | 1 item and/or 1 procedure |  | E.g. Ministry of Health and Long Term Care Schedule of Benefits: Physician Services<br>Similar definitions exist for other jurisdictions.                                                                                                            | Form 3, 4.1               |

|                                                   |                                                                                                                                                                                                                                                                                                                                                                                                                                                                                                                                                                                                                                                                                                                                      |                           |  |                                                                                                                                           |                           |
|---------------------------------------------------|--------------------------------------------------------------------------------------------------------------------------------------------------------------------------------------------------------------------------------------------------------------------------------------------------------------------------------------------------------------------------------------------------------------------------------------------------------------------------------------------------------------------------------------------------------------------------------------------------------------------------------------------------------------------------------------------------------------------------------------|---------------------------|--|-------------------------------------------------------------------------------------------------------------------------------------------|---------------------------|
| □ endotracheal tubes (without subglottic suction) | An endotracheal tube is a flexible plastic tube that is placed through the mouth into the trachea (windpipe) to help a patient breathe. The endotracheal tube is                                                                                                                                                                                                                                                                                                                                                                                                                                                                                                                                                                     | 1 item and/or 1 procedure |  | E.g. Ministry of Health and Long Term Care Schedule of Benefits: Physician Services<br>Similar definitions exist                          | Form 3, 4.1               |
|                                                   | then connected to a ventilator, which delivers oxygen to the lungs. Some tubes do not have subglottic suctioning capabilities                                                                                                                                                                                                                                                                                                                                                                                                                                                                                                                                                                                                        |                           |  | for other jurisdictions.                                                                                                                  |                           |
| □ invasive ventilation (ventilator days)          | Invasive mechanical ventilation can become a lifesaving intervention for your patients with respiratory and breathing difficulties. The term "invasive" is used if it involves any instrument penetrating via the mouth (such as an endotracheal tube), nose, or the skin (such as a tracheostomy tube through a stoma, a surgically-created hole in the windpipe) to serve as an artificial airway. The objectives of mechanical ventilation are primarily to provide oxygen, remove carbon dioxide, decrease the work of breathing and reverse lifethreatening conditions such as hypoxemia, or insufficient oxygenation of arterial blood, and acute progressive respiratory acidosis, or build-up of carbon dioxide in the blood | 1 item and/or 1 procedure |  | E.g. Ministry of Health and Long Term Care Schedule of Benefits: Physician Services<br>Similar definitions exist for other jurisdictions. | Form 3, 4.1               |
| ○ heat moisture exchange                          | Heat and Moisture Exchangers (HME) are devices used in mechanically ventilated patients intended to help prevent complications due to "drying of the respiratory mucosa, such as mucus plugging and endotracheal tube (ETT) occlusion." HMEs are one type of commercial humidification system, which also include non-heated-wire humidifiers and heated-wire humidifiers.                                                                                                                                                                                                                                                                                                                                                           | 1 item and/or 1 procedure |  | E.g. Ministry of Health and Long Term Care Schedule of Benefits: Physician Services<br>Similar definitions exist for other jurisdictions. | PROSPECT Site Information |
| ○ heated humidifier                               | Heated humidifiers or heated breathing circuits are typically a sealed heated wire within one limb of the breathing circuit. Sterile water is introduced into the circuit and the servomechanism controlled heater maintains temperature. These devices are prone to hazards, such as overheating, condensation, changes in the compressible volume of the circuit, leaks in the tubing, and obstruction, if they are not connected correctly.                                                                                                                                                                                                                                                                                       | 1 item and/or 1 procedure |  | E.g. Ministry of Health and Long Term Care Schedule of Benefits: Physician Services<br>Similar definitions exist for other jurisdictions. | PROSPECT Site Information |

|                          |                                            |                                                                                                                                                                                                                                                                                                                                                                                                          |                           |  |                                                                                                                                            |          |
|--------------------------|--------------------------------------------|----------------------------------------------------------------------------------------------------------------------------------------------------------------------------------------------------------------------------------------------------------------------------------------------------------------------------------------------------------------------------------------------------------|---------------------------|--|--------------------------------------------------------------------------------------------------------------------------------------------|----------|
| <input type="checkbox"/> | non-invasive positive pressure ventilation | Noninvasive ventilation (NIV) refers to the administration of ventilatory support without using an invasive artificial airway (endotracheal tube or tracheostomy tube). Noninvasive positive pressure ventilation (NIPPV) assists a person in taking a full breath and helps to maintain an adequate oxygen supply to the body. NIPPV provides ventilatory support to a person through the upper airways | 1 item and/or 1 procedure |  | E.g. Ministry of Health and Long Term Care Schedule of Benefits: Physician Services<br>Similar definitions exist for other jurisdictions.  | Form 4.1 |
| <input type="checkbox"/> | high-flow nasal cannula                    | High-flow nasal cannula (HFNC) therapy is an oxygen supply system capable of delivering up to 100% humidified and heated oxygen at a flow rate of up to 60 liters per minute                                                                                                                                                                                                                             | 1 item and/or 1 procedure |  | E.g. Ministry of Health and Long Term Care Schedule of Benefits: Physician Services<br>Similar definitions exist for other jurisdictions.0 | Form 4.1 |
|                          | Vasopressor agents                         |                                                                                                                                                                                                                                                                                                                                                                                                          |                           |  |                                                                                                                                            |          |
| <input type="checkbox"/> | norepinephrine                             | norepinephrine (vasopressor agent:                                                                                                                                                                                                                                                                                                                                                                       | Per                       |  | E.g. hospital formulary                                                                                                                    | Form 4.1 |

|                          |                        |                                                                                                            |                            |  |                                                       |                           |
|--------------------------|------------------------|------------------------------------------------------------------------------------------------------------|----------------------------|--|-------------------------------------------------------|---------------------------|
|                          |                        | primarily alpha receptor agonist with some beta activity) that is given continuously as a diluted liquid   | microgram or milligram     |  | pharmacy contact (name, date)                         |                           |
| <input type="checkbox"/> | vasopressin            | vasopressin (vasopressin receptor agonist) that is given continuously as a diluted liquid                  | Per microgram or milligram |  | E.g. hospital formulary pharmacy contact (name, date) | Form 4.1                  |
| <input type="checkbox"/> | phenylephrine          | phenylephrine (primarily alpha receptor agonist) that is given continuously as a diluted liquid            | Per microgram or milligram |  | E.g. hospital formulary pharmacy contact (name, date) | Form 4.1                  |
|                          | Inotropic agents       |                                                                                                            |                            |  |                                                       |                           |
| <input type="checkbox"/> | epinephrine            | epinephrine (both alpha and beta agonist) that is given continuously as a diluted liquid                   | Per microgram or milligram |  | E.g. hospital formulary pharmacy contact (name, date) | Form 4.1                  |
| <input type="checkbox"/> | dobutamine             | dobutamine (primarily beta agonist) that is given continuously as a diluted liquid                         | Per microgram or milligram |  | E.g. hospital formulary pharmacy contact (name, date) | Form 4.1                  |
| <input type="checkbox"/> | milrinone              | milrinone (phosphodiesterase inhibitor) that is given continuously as a diluted liquid                     | Per microgram or milligram |  | E.g. hospital formulary pharmacy contact (name, date) | Form 4.1                  |
| <input type="checkbox"/> | dopamine               | dopamine (primarily beta agonist, with some alpha activity) that is given continuously as a diluted liquid | Per microgram or milligram |  | E.g. hospital formulary pharmacy contact (name, date) | Form 4.1                  |
|                          | VAP prevention bundles |                                                                                                            |                            |  |                                                       |                           |
| <input type="checkbox"/> | chlorhexidine usage    | chlorhexidine oral washes (site specific)                                                                  | 1 item/1 procedure         |  | E.g. hospital formulary pharmacy contact (name, date) | PROSPECT Site Information |
| <input type="checkbox"/> | bacterial filters      | bacterial filters (site specific)                                                                          | 1 item/1 procedure         |  | E.g. hospital formulary pharmacy contact (name, date) | PROSPECT Site Information |
| <input type="checkbox"/> | oral decontamination   | oral decontamination (site specific)                                                                       | 1 item/1 procedure         |  | E.g. hospital formulary pharmacy contact (name, date) | PROSPECT Site Information |
| <input type="checkbox"/> | gut decontamination    | Gut decontamination (site specific)                                                                        | 1 item/1 procedure         |  | E.g. hospital formulary pharmacy contact (name, date) | PROSPECT Site Information |

|                                                |                                                                                                                                                                                                                                                                                                                                                                                                                                                                    |                    |  |                                                                                                                                                                                                                                                                             |                           |
|------------------------------------------------|--------------------------------------------------------------------------------------------------------------------------------------------------------------------------------------------------------------------------------------------------------------------------------------------------------------------------------------------------------------------------------------------------------------------------------------------------------------------|--------------------|--|-----------------------------------------------------------------------------------------------------------------------------------------------------------------------------------------------------------------------------------------------------------------------------|---------------------------|
| ○ oral antibiotic paste                        | oral antibiotic paste (site specific)                                                                                                                                                                                                                                                                                                                                                                                                                              | 1 item/1 procedure |  | E.g. hospital formulary pharmacy contact (name, date)                                                                                                                                                                                                                       | PROSPECT Site Information |
| □ colonoscopy (cautery, epinephrine injection) | A colonoscopy is an examination of a patient's large intestine (colon and rectum), often to find areas of inflammation or bleeding. using a colonoscope with fiber optic visualization, performed usually in the ICU, occasionally in the endoscopy suite of a hospital."                                                                                                                                                                                          | 1 item/1 procedure |  | E.g. BC Health Guide Colonoscopy: <a href="http://www.bchealthguide.org/kbase/topic/medtest/hw209694/descrip.htm">http://www.bchealthguide.org/kbase/topic/medtest/hw209694/descrip.htm</a> Ministry of Health and Long Term Care Schedule of Benefits: Laboratory Services | Form 14                   |
| □ transesophageal echocardiograms              | In a transesophageal echocardiogram, a transducer is inserted through the mouth and down the throat into the esophagus. High-pitched sound waves (ultrasound) are sent through the transducer to produce an image of the heart and sometimes the aorta. This method allows a clear view of the valves and their ability to function. It provides a better view of heart valves than a standard transthoracic echocardiogram, but the procedure is more complicated | 1 item/1 procedure |  | E.g. BC Health Guide Transesophageal echocardiogram: <a href="https://www.healthlinkbc.ca/healthtopics/stt11675">https://www.healthlinkbc.ca/healthtopics/stt11675</a> Ministry of Health and Long Term Care Schedule of Benefits: Laboratory Services                      | Form 8, 20                |
| □ transthoracic echocardiograms                | An echocardiogram (also called an echo) is a type of ultrasound test that uses high-pitched sound waves that are sent through a device called a transducer. The device picks up echoes of the sound waves as they bounce off                                                                                                                                                                                                                                       | 1 item/1 procedure |  | E.g. BC Health Guide Echocardiograms: <a href="https://www.healthlinkbc.ca/medicaltests/hw212692">https://www.healthlinkbc.ca/medicaltests/hw212692</a> Ministry of Health and Long Term Care                                                                               | Form 8, 20                |

|                |                                                                                                                                                                        |                    |  |                                                                                                                                                                                                                                                                              |           |
|----------------|------------------------------------------------------------------------------------------------------------------------------------------------------------------------|--------------------|--|------------------------------------------------------------------------------------------------------------------------------------------------------------------------------------------------------------------------------------------------------------------------------|-----------|
|                | the different parts of your heart. These echoes are turned into moving pictures of your heart that can be seen on a video screen.                                      |                    |  | Schedule of Benefits: Laboratory Services                                                                                                                                                                                                                                    |           |
| □ bronchoscopy | A bronchoscopy examines the patient's airway with a flexible fiberoptic bronchoscope, to determine if there may be an infection, obstruction due to secretions, a mass | 1 item/1 procedure |  | E.g. BC Health Guide Bronchoscopy: <a href="http://www.bchealthguide.org/kbase/topic/medtest/hw200474/descrip.htm">http://www.bchealthguide.org/kbase/topic/medtest/hw200474/descrip.htm</a> Ministry of Health and Long Term Care Schedule of Benefits: Laboratory Services | Form 8, 9 |
| □ thoracostomy | After lung surgery, one or more chest tubes are used to drain fluid and blood out of the chest cavity. The chest tubes also help the lungs refill with air.            | 1 procedure        |  | E.g. BC Health Guide Chest Tube: <a href="https://www.healthlinkbc.ca/healthtopics/zm2679">https://www.healthlinkbc.ca/healthtopics/zm2679</a> Ministry of Health and Long Term Care Schedule of Benefits: Laboratory Services                                               | Form 8, 9 |

|   |                                                               |                                                                                                                                                                                                                                                                                                                                                                                                                                                                                                                                                                                                                                                                                                                                                                                                                                                                                          |                    |  |                                                                                                                                                                                                                                                  |          |
|---|---------------------------------------------------------------|------------------------------------------------------------------------------------------------------------------------------------------------------------------------------------------------------------------------------------------------------------------------------------------------------------------------------------------------------------------------------------------------------------------------------------------------------------------------------------------------------------------------------------------------------------------------------------------------------------------------------------------------------------------------------------------------------------------------------------------------------------------------------------------------------------------------------------------------------------------------------------------|--------------------|--|--------------------------------------------------------------------------------------------------------------------------------------------------------------------------------------------------------------------------------------------------|----------|
| 1 | <input type="checkbox"/> tracheostomy                         | Tracheostomy is surgery that is sometimes used to treat obstructive sleep apnea (OSA), failure to wean from ventilator or pulmonary toilet. In this surgery, the surgeon creates a permanent opening in the neck to the windpipe (trachea). He or she then puts a tube into the opening to let air in.                                                                                                                                                                                                                                                                                                                                                                                                                                                                                                                                                                                   | 1 procedure        |  | E.g. BC Health Guide<br>Tracheotomy:<br><a href="https://www.healthlinkbc.ca/healthtopics/hw49093">https://www.healthlinkbc.ca/healthtopics/hw49093</a><br>Ministry of Health and Long Term Care<br>Schedule of Benefits:<br>Laboratory Services | Form 4.1 |
| 2 | <input type="checkbox"/> interventional radiology drain       | Centesis is a procedure to take out fluid that has collected in a cavity. The fluid is taken out using a long, thin needle put through the belly. The fluid is sent to a lab and studied to find the cause of the fluid buildup. Paracentesis can also leave a drain.                                                                                                                                                                                                                                                                                                                                                                                                                                                                                                                                                                                                                    | 1 procedure        |  | E.g. Ontario Ministry of Health and Long Term Care Schedule of Benefits: Physician Services. Similar definitions exist for other jurisdictions.                                                                                                  | Form 9   |
| 3 | <input type="checkbox"/> intermittent hemodialysis            | Dialysis is a mechanical process that performs the work of healthy kidneys. Hemodialysis uses a manmade membrane (dialyzer) to remove wastes and extra fluid from the blood. It also restores the proper balance of certain minerals in the blood (electrolytes). The fluid used to filter or clean the blood is called dialysate. Hemodialysis is usually done in a hospital or dialysis centre. Before dialysis can begin, the doctor has to create a dialysis access. In hemodialysis, the access is the place where the dialysis needles are inserted, to carry the blood to and from the dialysis machine. For the best access, the doctor builds a connection, called a fistula, between an artery and a vein in the forearm. Or the doctor uses a tube called a graft to connect the artery and a vein. Sometimes a plastic tube (central venous catheter) is placed in the neck. | 1 procedure        |  | E.g. Ontario Ministry of Health and Long Term Care Schedule of Benefits: Physician Services. Similar definitions exist for other jurisdictions.                                                                                                  | Form 4.1 |
| 4 | <input type="checkbox"/> continuous renal replacement therapy | Continuous veno-venous haemodiafiltration                                                                                                                                                                                                                                                                                                                                                                                                                                                                                                                                                                                                                                                                                                                                                                                                                                                | 1 item/1 procedure |  | E.g. Ontario Ministry of Health and Long Term Care Schedule of Benefits: Physician Services. Similar definitions exist for other jurisdictions.                                                                                                  | Form 4.1 |

|   |                                                  |                                                |                    |  |                                                                                                                                                 |          |
|---|--------------------------------------------------|------------------------------------------------|--------------------|--|-------------------------------------------------------------------------------------------------------------------------------------------------|----------|
| 5 | <input type="checkbox"/> peritoneal dialysis     | Peritoneal dialysis through abdominal cannulae | 1 item/1 procedure |  | jurisdictions.                                                                                                                                  |          |
| 6 | <input type="checkbox"/> fecal management device | Flexiseal device for fecal management          | 1 item/1 procedure |  | E.g. Ontario Ministry of Health and Long Term Care Schedule of Benefits: Physician Services. Similar definitions exist for other jurisdictions. | Form 4.3 |

|                                                   |                                                                                                                                                                                                                                                                                                                                                                                                                                                                                                                                                                                                                                                                                                                                                                                                                                                                                                                                                                                                                                                                                               |             |  |                                                                                                                                                                                                                                                                                                                |          |
|---------------------------------------------------|-----------------------------------------------------------------------------------------------------------------------------------------------------------------------------------------------------------------------------------------------------------------------------------------------------------------------------------------------------------------------------------------------------------------------------------------------------------------------------------------------------------------------------------------------------------------------------------------------------------------------------------------------------------------------------------------------------------------------------------------------------------------------------------------------------------------------------------------------------------------------------------------------------------------------------------------------------------------------------------------------------------------------------------------------------------------------------------------------|-------------|--|----------------------------------------------------------------------------------------------------------------------------------------------------------------------------------------------------------------------------------------------------------------------------------------------------------------|----------|
| □ fecal transplant                                | <p><i>Clostridium difficile</i> colitis (or <i>C. difficile</i> colitis) is inflammation of the large intestine (colon) caused by a certain type of bacteria (<i>Clostridium difficile</i>). It sometimes occurs after a hospital stay or antibiotic treatment.</p> <p>Symptoms (which can be mild or severe) include stomach cramps, diarrhea, nausea, vomiting, and fever. The first step in treatment for <i>C. difficile</i> colitis is to stop taking the antibiotics that caused the infection, if possible. Treatment also may include taking an antibiotic that specifically kills <i>C. difficile</i>.</p> <p>You may get a medicine called a bile salt binder (such as cholestyramine) that can help control the diarrhea. And probiotics, which are bacteria that help keep the natural balance of organisms (microflora) in the intestines, may be helpful for people who have repeated <i>C. difficile</i> infections.</p> <p>In some cases, a fecal transplant can be done that restores good bacteria to the colon and helps get rid of the <i>C. difficile</i> infection.</p> | 1 procedure |  | <p>E.g. BC Health Guide Fecal Transplant: <a href="http://www.bchealthguide.org/kbase/topic/medtest/hw200474/descrip.htm">http://www.bchealthguide.org/kbase/topic/medtest/hw200474/descrip.htm</a></p> <p>Ministry of Health and Long Term Care<br/>Schedule of Benefits:<br/>Laboratory Services</p>         | Form 4.3 |
| Operative costs                                   |                                                                                                                                                                                                                                                                                                                                                                                                                                                                                                                                                                                                                                                                                                                                                                                                                                                                                                                                                                                                                                                                                               |             |  |                                                                                                                                                                                                                                                                                                                |          |
| □ laparotomy (toxic megacolon, bowel perforation) | <p>"Laparotomy is a surgical procedure that allows the surgeon to see and inspect the abdominal cavity for structural problems. This encompasses the surgeon fee; separate costs include the time for other operating room personnel, including nurses (often 2), an assistant physician, and overhead costs for the operating room (cleaning, power, etc.), captured variably at each hospital.</p>                                                                                                                                                                                                                                                                                                                                                                                                                                                                                                                                                                                                                                                                                          | 1 procedure |  | <p>E.g. BC Health Guide Surgery for laparotomy: <a href="http://www.bchealthguide.org/kbase/topic/detail/surgical/tv2567/detail.htm">http://www.bchealthguide.org/kbase/topic/detail/surgical/tv2567/detail.htm</a></p>                                                                                        | Form 14  |
| □ colectomy                                       | <p>Toxic megacolon is a rare but dangerous condition that occurs when the colon swells to many times its normal size. It is usually a complication of an inflammatory bowel disease, such as ulcerative colitis or Crohn's disease.</p> <p>Severe inflammation and ulceration can weaken muscles in the colon, causing the colon to swell. Symptoms may include a swollen belly, abdominal pain or tenderness, rapid heartbeat, or fever. Over time, holes</p>                                                                                                                                                                                                                                                                                                                                                                                                                                                                                                                                                                                                                                | 1 procedure |  | <p>E.g. BC Health Guide Toxic megacolon: <a href="https://www.healthlinkbc.ca/health-topics/tb1915">https://www.healthlinkbc.ca/health-topics/tb1915</a></p> <p>Ontario Ministry of Health and Long Term Care Schedule of Benefits: Physician Services. Similar definitions exist for other jurisdictions.</p> | Form 14  |

|                                                                                      |                                                                                                                                                                                                                                                                                                                                                                                                                                                                                               |             |  |                                                                                                                                                                                                                                                                                                                  |              |
|--------------------------------------------------------------------------------------|-----------------------------------------------------------------------------------------------------------------------------------------------------------------------------------------------------------------------------------------------------------------------------------------------------------------------------------------------------------------------------------------------------------------------------------------------------------------------------------------------|-------------|--|------------------------------------------------------------------------------------------------------------------------------------------------------------------------------------------------------------------------------------------------------------------------------------------------------------------|--------------|
|                                                                                      | (perforations) may form in the colon, and stool may spill into the abdominal cavity, causing a serious infection. This can be lifethreatening. Toxic megacolon is an emergency that requires immediate medical treatment to prevent dehydration and shock. Surgery may be needed to remove all or part of the colon (colectomy).                                                                                                                                                              |             |  |                                                                                                                                                                                                                                                                                                                  |              |
| <input type="checkbox"/> thoracotomy                                                 | "one or more chest tubes are used to drain fluid and blood out of the chest cavity. The chest tubes also help the lungs refill with air."                                                                                                                                                                                                                                                                                                                                                     | 1 procedure |  | E.g. BC Health Guide Chest tube: <a href="https://www.healthlinkbc.ca/healthtopics/zm2679">https://www.healthlinkbc.ca/healthtopics/zm2679</a> Ontario Ministry of Health and Long Term Care Schedule of Benefits: Physician Services. Similar definitions exist for other jurisdictions.                        | Form 9.1     |
| <input type="checkbox"/> open abdominal wound (vacuumassisted closure (VAC) devices) | Negative-pressure wound therapy (sometimes called "vacuum-assisted closure"). A sterile sponge or a special gauze that fights germs is placed in the sore. It's covered with a sticky bandage that does not allow any air in. The small vacuum is then turned on and kept on at all times until the next treatment. The vacuum pulls drainage from the wound and gently pulls the blood supply close to the surface of the sore. This brings nutrients to the sore and helps new tissue grow. | 1 procedure |  | E.g. BC Health Guide Negative-pressure wound therapy: <a href="https://www.healthlinkbc.ca/healthtopics/abp5591">https://www.healthlinkbc.ca/healthtopics/abp5591</a> Ontario Ministry of Health and Long Term Care Schedule of Benefits: Physician Services. Similar definitions exist for other jurisdictions. | Form 14      |
| <input type="checkbox"/> surgeon                                                     | "Laparotomy is a surgical procedure that allows the surgeon to see and inspect the abdominal cavity for structural problems. This encompasses the surgeon fee; separate costs include the time for other operating room personnel, including nurses (often 2), an assistant physician, and overhead costs for the operating room (cleaning, power, etc.), captured variably at each hospital.                                                                                                 | 1 procedure |  | E.g. Ontario Ministry of Health and Long Term Care Schedule of Benefits: Physician Services. Similar definitions exist for other jurisdictions.                                                                                                                                                                  | Form 4.1, 14 |

|                             |                                                                                                                                                                                                                                                                                                                                                                                                                                                                                                                                                                                                                                                                                      |                                         |  |                                                                                                                                                        |                     |
|-----------------------------|--------------------------------------------------------------------------------------------------------------------------------------------------------------------------------------------------------------------------------------------------------------------------------------------------------------------------------------------------------------------------------------------------------------------------------------------------------------------------------------------------------------------------------------------------------------------------------------------------------------------------------------------------------------------------------------|-----------------------------------------|--|--------------------------------------------------------------------------------------------------------------------------------------------------------|---------------------|
| <p>□ surgical assistant</p> | <p>See above in Laparotomy-surgical fee; Assistance at surgery include:</p> <p>a) Preparing or supervising preparation of the patient for the procedure</p> <p>b) Performing the procedure by any method, or assisting another physician in the performance of the procedure(s), assisting with carrying out of all recovery room procedures and transfer of the patient to the recovery room, and any ongoing monitoring and detention rendered during the immediate post-operative and recovery period, when indicated.</p> <p>c) Making arrangements for any related assessments, procedures, or therapy</p>                                                                      | <p>1 procedure</p>                      |  | <p>E.g. Ontario Ministry of Health and Long Term Care Schedule of Benefits: Physician Services. Similar definitions exist for other jurisdictions.</p> | <p>Form 4.1, 14</p> |
|                             | <p>(including obtaining any specimens from the patient) and/or interpreting results.</p> <p>d) When medically indicated, monitoring the condition of the patient for post-procedure follow-up until the first post-operative visit.</p> <p>e) Discussion with and providing any advice and information, including prescribing therapy to the patient or the patient's representative(s), whether by telephone or otherwise, on matters related to the service</p> <p>Providing premises, equipment, supplies and personnel for services for any aspect(s) of a, c, d and e that is (are) performed in a place other than the place in which the surgical procedure is performed.</p> |                                         |  |                                                                                                                                                        |                     |
| <p>□ anesthesiology</p>     | <p>See above in Laparotomy- surgical fee; the anesthesia component including pre-operative assessment of the patient, anesthesia during the procedure and post-operative care until the patient is discharged back to the care of the next responsible physician (e.g. the intensive care physician or surgeon)</p>                                                                                                                                                                                                                                                                                                                                                                  | <p>1 procedure</p>                      |  | <p>E.g. Ontario Ministry of Health and Long Term Care Schedule of Benefits: Physician Services. Similar definitions exist for other jurisdictions.</p> | <p>Form 4.1, 14</p> |
| <p>□ nursing</p>            | <p>See above in Laparotomy-surgical fee; nurses assist surgery.</p>                                                                                                                                                                                                                                                                                                                                                                                                                                                                                                                                                                                                                  | <p>Per hour<br/>For 1<br/>procedure</p> |  | <p>E.g. as defined at hospital level and associated costs of nursing per hour or procedure in the operating room</p>                                   | <p>Form 4.1, 14</p> |
| <p>Overhead costs</p>       |                                                                                                                                                                                                                                                                                                                                                                                                                                                                                                                                                                                                                                                                                      |                                         |  |                                                                                                                                                        |                     |



|             |                                                                                                                                                                                                                                                                                                                                                                                                                                                                                                                                                                                                                                                                                                                                                                                                                    |       |  |                                                         |                      |
|-------------|--------------------------------------------------------------------------------------------------------------------------------------------------------------------------------------------------------------------------------------------------------------------------------------------------------------------------------------------------------------------------------------------------------------------------------------------------------------------------------------------------------------------------------------------------------------------------------------------------------------------------------------------------------------------------------------------------------------------------------------------------------------------------------------------------------------------|-------|--|---------------------------------------------------------|----------------------|
| □ ICU days  | The definition for the ICU where the most intensive life-supporting care can be provided. In the Ontario context, ICU's are designated Level III (all levels of cardiac and respiratory and other organ life support can be provided; nursing:patient ratio is usually 1:1 or 1:2); Level II (often patients can receive intravenous vasoactive medications, and occasionally have endotracheal intubation, but not mechanical ventilation; nursing ration is often 1:2-4); Level I ICU (can provide respiratory or cardiographic monitoring, possibly an arterial blood pressure or central venous catheter, but not generally intravenous vasoactive medications; nursing ratio often 1:3-4)<br>- We will require the cost breakdown of component parts of the ICU stay (as to prevent double-counting of items) | 1 day |  | E.g. critical care directorate web site of jurisdiction | Form 3, 4, 17, 18    |
| □ ward days | General in-patient ward bed in acute care hospital<br>- We will require the cost breakdown of component parts of the ICU stay (as to                                                                                                                                                                                                                                                                                                                                                                                                                                                                                                                                                                                                                                                                               | 1 day |  | E.g. Ontario ministry of health and long-term care      | Form 3, 4, 4B 17, 18 |
|             | prevent double-counting of items)                                                                                                                                                                                                                                                                                                                                                                                                                                                                                                                                                                                                                                                                                                                                                                                  |       |  |                                                         |                      |

CT = computerized tomography; ECMO = extracorporeal membrane oxygenation; ELISA = enzyme-linked immunosorbent assay; IABP = intra-aortic balloon pump; ICU = intensive care unit; LAMP = loop-mediated isothermal amplification; MRI = magnetic resonance imaging; NM = nuclear medicine; PEG = percutaneous endoscopic gastrostomy; PCR = polymerase chain reaction; PROSPECT = Probiotics: Prevention of Severe Pneumonia and Endotracheal Colonization Trial; US = United States; V-A = venous-arterial; V-V = veno-venous; VAC = vacuum-assisted closure; VAP = ventilator-associated pneumonia;

### Supplemental Table 5: CHEERS checklist—Items to include when reporting economic evaluations of health interventions

| Section/item                                           | Item No | Recommendation                                                                                                                                                                              | Reported on page No                |
|--------------------------------------------------------|---------|---------------------------------------------------------------------------------------------------------------------------------------------------------------------------------------------|------------------------------------|
| <b>Title and abstract</b>                              |         |                                                                                                                                                                                             |                                    |
| Title                                                  | 1       | Identify the study as an economic evaluation or use more specific terms such as “cost-effectiveness analysis”, and describe the interventions compared.                                     | Page 1                             |
| Abstract                                               | 2       | Provide a structured summary of objectives, perspective, setting, methods (including study design and inputs), results (including base case and uncertainty analyses), and conclusions.     | Page 2                             |
| <b>Introduction</b>                                    |         |                                                                                                                                                                                             |                                    |
| Background and objectives                              | 3       | Provide an explicit statement of the broader context for the study.<br>Present the study question and its relevance for or practice decisions.                                              | Page 4-5<br>Page 4-5 health policy |
| <b>Methods</b>                                         |         |                                                                                                                                                                                             |                                    |
| Target population and subgroups                        | 4       | Describe characteristics of the base case population and subgroups analysed, including why they were chosen.                                                                                | Page 5                             |
| Setting and location                                   | 5       | State relevant aspects of the system(s) in which the decision(s) need(s) to be made.                                                                                                        | Page 5                             |
| Study perspective                                      | 6       | Describe the perspective of the study and relate this to the costs being evaluated.                                                                                                         | Page 5                             |
| Comparators                                            | 7       | Describe the interventions or strategies being compared and state why they were chosen.                                                                                                     | Page 5                             |
| Time horizon                                           | 8       | State the time horizon(s) over which costs and consequences are being evaluated and say why appropriate.                                                                                    | Page 5                             |
| Discount rate                                          | 9       | Report the choice of discount rate(s) used for costs and outcomes and say why appropriate.                                                                                                  | Page 5, Table1                     |
| Choice of health outcomes                              | 10      | Describe what outcomes were used as the measure(s) of benefit in the evaluation and their relevance for the type of analysis performed.                                                     | Page 5                             |
| Measurement of effectiveness                           | 11a     | <i>Single study-based estimates</i> : Describe fully the design features of the single effectiveness study and why the single study was a sufficient source of clinical effectiveness data. | Page 5, 8                          |
|                                                        | 11b     | <i>Synthesis-based estimates</i> : Describe fully the methods used for identification of included studies and synthesis of clinical effectiveness data.                                     | Not applicable                     |
| Measurement and valuation of preference based outcomes | 12      | If applicable, describe the population and methods used to elicit preferences for outcomes.                                                                                                 | Not applicable                     |

|                                |     |                                                                                                                                                                                                                                                                                                                             |   |   |   |   |                |   |    |    |    |  |
|--------------------------------|-----|-----------------------------------------------------------------------------------------------------------------------------------------------------------------------------------------------------------------------------------------------------------------------------------------------------------------------------|---|---|---|---|----------------|---|----|----|----|--|
| 1                              | 2   | 3                                                                                                                                                                                                                                                                                                                           | 4 | 5 | 6 | 7 | 8              | 9 | 10 | 11 | 12 |  |
| Estimating resources and costs | 13° | <i>Single study-based economic evaluation:</i> Describe approaches used to estimate resource use associated with the alternative interventions. Describe primary or secondary research methods for valuing each resource item in terms of its unit cost. Describe any adjustments made to approximate to opportunity costs. |   |   |   |   | Page 5-6       |   |    |    |    |  |
|                                | 13b | <i>Model-based economic evaluation:</i> Describe approaches and data sources used to estimate                                                                                                                                                                                                                               |   |   |   |   | Not applicable |   |    |    |    |  |

| Section/item                   | Item No | Recommendation                                                                                                                                                                                                                                                              | Reported on page No |
|--------------------------------|---------|-----------------------------------------------------------------------------------------------------------------------------------------------------------------------------------------------------------------------------------------------------------------------------|---------------------|
|                                |         | resource use associated with model health states. Describe primary or secondary research methods for valuing each resource item in terms of its unit cost. Describe any adjustments made to approximate to opportunity costs.                                               |                     |
| <b>Results</b>                 |         |                                                                                                                                                                                                                                                                             |                     |
| Study parameters               | 18      | Report the values, ranges, references, and, if used, probability distributions for all parameters. Report reasons or sources for distributions used to represent uncertainty where appropriate. Providing a table to show the input values is strongly recommended.         | Page 5-7            |
| Incremental costs and outcomes | 19      | For each intervention, report mean values for the main categories of estimated costs and outcomes of interest, as well as mean differences between the comparator groups. If applicable, report incremental cost-effectiveness ratios.                                      | Page 5-7            |
| Characterising uncertainty     | 20a     | <i>Single study-based economic evaluation:</i> Describe the effects of sampling uncertainty for the estimated incremental cost and incremental effectiveness parameters, together with the impact of methodological assumptions (such as discount rate, study perspective). | Page 5-7            |
|                                | 20b     | <i>Model-based economic evaluation:</i> Describe the effects on the results of uncertainty for all input parameters, and uncertainty related to the structure of the model and assumptions.                                                                                 | Not applicable      |
| Characterising heterogeneity   | 21      | If applicable, report differences in costs, outcomes, or cost-effectiveness that can be explained by variations between subgroups of patients with different baseline characteristics or other observed variability in effects that are not reducible by more information.  | Page 7              |
| <b>Discussion</b>              |         |                                                                                                                                                                                                                                                                             |                     |

|    |                           |    |                                                                   |
|----|---------------------------|----|-------------------------------------------------------------------|
| 1  |                           |    |                                                                   |
| 2  |                           |    |                                                                   |
| 3  | Study findings,           |    | limitations, 22 Summarise key study findings and                  |
| 4  | describe how they         |    | generalizability, and support the conclusions                     |
| 5  | reached. Discuss          |    | limitations current knowledge and the                             |
| 6  | generalizability of the   |    | findings and how the findings fit with current                    |
| 7  | knowledge.                |    | Page 7                                                            |
| 8  | <b>Other</b>              |    |                                                                   |
| 9  |                           |    |                                                                   |
| 10 | Source of funding         | 23 | Describe how the study was funded and the role of Page 9          |
| 11 | Currency, price date, and | 14 | Report the dates of the estimated resource quantities Page 5-7    |
| 12 | conversion                |    | and unit costs. Describe methods for adjusting                    |
| 13 |                           |    | estimated unit costs to the year of reported costs if             |
| 14 |                           |    | necessary. Describe methods for converting costs into             |
| 15 |                           |    | a common currency base and the exchange rate.                     |
| 16 | Choice of model           | 15 | Describe and give reasons for the specific type of Not applicable |
| 17 |                           |    | decision-analytical model used. Providing a figure to             |
| 18 |                           |    | show model structure is strongly recommended.                     |
| 19 | Assumptions               | 16 | Describe all structural or other assumptions Table 4              |
| 20 |                           |    | underpinning the decision-analytical model.                       |
| 21 | Analytical methods        | 17 | Describe all analytical methods supporting the Page 6-7           |
| 22 |                           |    | evaluation. This could include methods for dealing                |
| 23 |                           |    | with skewed, missing, or censored data; extrapolation             |
| 24 |                           |    | methods; methods for pooling data; approaches to                  |
| 25 |                           |    | validate or make adjustments (such as half cycle                  |
| 26 |                           |    | corrections) to a model; and methods for handling                 |
| 27 |                           |    | population heterogeneity and uncertainty.                         |
| 28 |                           |    |                                                                   |
| 29 |                           |    |                                                                   |
| 30 |                           |    |                                                                   |
| 31 |                           |    |                                                                   |
| 32 |                           |    |                                                                   |
| 33 |                           |    |                                                                   |
| 34 |                           |    |                                                                   |
| 35 |                           |    |                                                                   |
| 36 |                           |    |                                                                   |
| 37 |                           |    |                                                                   |
| 38 |                           |    |                                                                   |
| 39 |                           |    |                                                                   |
| 40 |                           |    |                                                                   |
| 41 |                           |    |                                                                   |
| 42 |                           |    |                                                                   |
| 43 |                           |    |                                                                   |
| 44 |                           |    |                                                                   |
| 45 |                           |    |                                                                   |
| 46 |                           |    |                                                                   |
| 47 |                           |    |                                                                   |
| 48 |                           |    |                                                                   |
| 49 |                           |    |                                                                   |
| 50 |                           |    |                                                                   |
| 51 |                           |    |                                                                   |
| 52 |                           |    |                                                                   |
| 53 |                           |    |                                                                   |
| 54 |                           |    |                                                                   |
| 55 |                           |    |                                                                   |
| 56 |                           |    |                                                                   |
| 57 |                           |    |                                                                   |
| 58 |                           |    |                                                                   |
| 59 |                           |    |                                                                   |
| 60 |                           |    |                                                                   |

| Section/item          | Item No | Recommendation                                                                                                                                                                                                                                    | Reported on page No |
|-----------------------|---------|---------------------------------------------------------------------------------------------------------------------------------------------------------------------------------------------------------------------------------------------------|---------------------|
|                       |         | the funder in the identification, design, conduct, and reporting of the analysis. Describe other nonmonetary sources of support.                                                                                                                  |                     |
| Conflicts of interest | 24      | Describe any potential for conflict of interest of study contributors in accordance with journal policy. In the absence of a journal policy, we recommend authors comply with International Committee of Medical Journal Editors recommendations. | Page 15             |

For consistency, the CHEERS statement checklist format is based on the format of the CONSORT statement checklist
