# Supplementary material for: Economic evaluation alongside the Probiotics to Prevent Severe Pneumonia and Endotracheal Colonization Trial (E-PROSPECT): study protocol
Source: PubMed Central journal article supplement — BMJ Open. 2020 Jun 28;10(6):e036047. doi: 10.1136/bmjopen-2019-036047 (PMC7322334; doi:10.1136/bmjopen-2019-036047), 2020-06-28
Supplement: bmjopen-2019-036047supp001.pdf [file bmjopen-2019-036047supp001.pdf]

Supplemental Table 1: Definitions of clinical outcomes

| <u>Clinical Outcome</u>                      | <u>Definition</u>                                                                                                                                                                                                                                                                                                                                                                                                                                                                                                                                                                                                                                                                                                   | <u>Source/Rationale</u>                                                                                                                                                                                                                                                                                                                                                                                                                                                                                                                                                                                                                                                                                     |
|----------------------------------------------|---------------------------------------------------------------------------------------------------------------------------------------------------------------------------------------------------------------------------------------------------------------------------------------------------------------------------------------------------------------------------------------------------------------------------------------------------------------------------------------------------------------------------------------------------------------------------------------------------------------------------------------------------------------------------------------------------------------------|-------------------------------------------------------------------------------------------------------------------------------------------------------------------------------------------------------------------------------------------------------------------------------------------------------------------------------------------------------------------------------------------------------------------------------------------------------------------------------------------------------------------------------------------------------------------------------------------------------------------------------------------------------------------------------------------------------------|
| <u>Ventilator-associated pneumonia (VAP)</u> | <p>The primary outcome is adjudicated VAP. Clinically suspected VAP at participating sites is being centrally adjudicated independently and in duplicate by 2 physicians blinded to allocation and center, informed by the following standardized definition: receiving invasive mechanical ventilation for &gt; 2 days, when there is a new, progressive or persistent radiographic infiltrate on chest radiograph plus any 2 of the following:</p> <ol style="list-style-type: none"> <li>1) fever (temperature &gt;38°C) or hypothermia (temperature &lt;36°C);</li> <li>2) relative leukopenia (&lt;3.0 x 10<sup>6</sup>/L) or leukocytosis (&gt;10 x 10<sup>6</sup>/L);</li> <li>3) purulent sputum</li> </ol> | <p>The American College of Chest Physicians (ACCP) definition did not provide thresholds for leukopenia or leukocytosis. Therefore, the thresholds were obtained from Morrow et al [Morrow] as their VAP definition was also based on the ACCP definition [Grossman]. Any disagreement in adjudication will be resolved through discussion and consensus. Acknowledging that there is no universally accepted gold standard VAP definition [3], and that in non-immunocompromised patients, routine invasive testing is not associated with improved outcomes [Canadian Critical Care Trials Group], we are also collecting data to allow VAP reporting according to several other definitions [46–49].</p> |
| <u>Early VAP</u>                             | <p>Pneumonia arising on day 3, 4 or 5 after the initiation of mechanical ventilation.</p>                                                                                                                                                                                                                                                                                                                                                                                                                                                                                                                                                                                                                           | <p>We are classifying VAP by early VAP and late VAP, as the etiologic organisms may differ, the antimicrobials prescribed may differ, and the prognosis is often worse for late VAP [50,51]. We will also report a composite outcome of early VAP, late VAP, and post-extubation pneumonia, adjudicated independently and in duplicate by 2 physicians. For the timing of all pneumonia outcomes, we use days rather than hours to inform the classification.</p>                                                                                                                                                                                                                                           |
| <u>Late VAP</u>                              | <p>Late VAP is defined as VAP arising on day 6 of mechanical ventilation or later, and including up to 2 days after</p>                                                                                                                                                                                                                                                                                                                                                                                                                                                                                                                                                                                             |                                                                                                                                                                                                                                                                                                                                                                                                                                                                                                                                                                                                                                                                                                             |

|                                                            |                                                                                                                                                                                                                                                             |                                                                                                                                                                                                                                                                                                                                                                                                                                                                                                                                                                 |
|------------------------------------------------------------|-------------------------------------------------------------------------------------------------------------------------------------------------------------------------------------------------------------------------------------------------------------|-----------------------------------------------------------------------------------------------------------------------------------------------------------------------------------------------------------------------------------------------------------------------------------------------------------------------------------------------------------------------------------------------------------------------------------------------------------------------------------------------------------------------------------------------------------------|
|                                                            | discontinuation of mechanical ventilation (also relevant for patients with a tracheostomy)                                                                                                                                                                  |                                                                                                                                                                                                                                                                                                                                                                                                                                                                                                                                                                 |
| <u>Post-extubation pneumonia</u>                           | Pneumonia arising in the ICU following discontinuation of mechanical ventilation (3 or more days after discontinuation), labeled post-extubation pneumonia, to avoid suppressing potentially relevant lung infections that arise in ICU                     |                                                                                                                                                                                                                                                                                                                                                                                                                                                                                                                                                                 |
| <u>Diarrhea</u>                                            | Diarrhea in the ICU: <ul style="list-style-type: none"> <li>• World Health Organization definition (<math>\geq 3</math> loose or watery bowel movements per day)</li> <li>• Bristol Stool classification for loose or watery stool (type 6 or 7)</li> </ul> | We will record each bowel movement and define diarrhea incorporating 2 metrics [6,52]                                                                                                                                                                                                                                                                                                                                                                                                                                                                           |
| <u>Clostridioides difficile-associated diarrhea (CDAD)</u> | Clostridioides difficile in the ICU and prior to discharge from hospital: diarrhea (as previously defined) and laboratory confirmation of C. difficile or colonoscopic or histopathologic findings demonstrating pseudomembranous colitis                   | Definition from Cohen et al. [53]. Will be adjudicated independently and in duplicate by 2 physicians                                                                                                                                                                                                                                                                                                                                                                                                                                                           |
| <u>Antibiotic-associated diarrhea (AAD)</u>                | AAD: diarrhea (as above) defined as following the administration of antibiotics, any day antibiotics are administered or within 1 day after starting any antibiotic                                                                                         | Definition from Thibault et al. [54]                                                                                                                                                                                                                                                                                                                                                                                                                                                                                                                            |
| <u>Other healthcare-associated infections</u>              | Any infection acquired during the ICU stay, including bloodstream infection, intravascular catheter-related bloodstream infection, intra-abdominal infection, C. difficile infection, urinary tract infection, skin and soft tissue infection, and others.  | These individual infections are classified using definitions adapted from the International Sepsis Forum Consensus Conference on Definitions of Infection in the Intensive Care Unit [47], as adapted in prior studies [46]. We will also report a composite outcome of any infections (including pneumonia) acquired during the ICU stay. Secondary infectious outcomes (other than pneumonia and C. difficile) are being centrally adjudicated by 1 physician blinded to allocation and center, based on review of data collected at each participating site. |
| <u>Serious adverse events (SAE)</u>                        | Defined as isolation of Lactobacillus spp. in a culture from a sterile site or as the                                                                                                                                                                       | The rationale for our approach to SAEs [Guidance                                                                                                                                                                                                                                                                                                                                                                                                                                                                                                                |

|  |                                                                                                                                                                                                         |                                                                                                                                                                                                                                                                                                                                                                                                                                       |
|--|---------------------------------------------------------------------------------------------------------------------------------------------------------------------------------------------------------|---------------------------------------------------------------------------------------------------------------------------------------------------------------------------------------------------------------------------------------------------------------------------------------------------------------------------------------------------------------------------------------------------------------------------------------|
|  | sole or predominant organism cultured from a non-sterile site and results in:<br>1) persistent or significant disability or incapacity;<br>2) that is life-threatening, or;<br>3) that results in death | Document for Industry] accords with our guidelines for academic drug trials in critical care [55]. Any culture obtained by the ICU team and processed by the clinical microbiology laboratory as positive for <i>Lactobacillus</i> spp. is recorded. Any such bacterial sample is sent to a McMaster University research laboratory for strain genotyping to evaluate consistency with the administered <i>L. rhamnosus</i> GG strain |
|--|---------------------------------------------------------------------------------------------------------------------------------------------------------------------------------------------------------|---------------------------------------------------------------------------------------------------------------------------------------------------------------------------------------------------------------------------------------------------------------------------------------------------------------------------------------------------------------------------------------------------------------------------------------|
