# Supplementary material for: Economic evaluation alongside the Probiotics to Prevent Severe Pneumonia and Endotracheal Colonization Trial (E-PROSPECT): study protocol
Source: PubMed Central journal article supplement — BMJ Open. 2020 Jun 28;10(6):e036047. doi: 10.1136/bmjopen-2019-036047 (PMC7322334; doi:10.1136/bmjopen-2019-036047), 2020-06-28
Supplement: bmjopen-2019-036047supp002.pdf [file bmjopen-2019-036047supp002.pdf]

Supplemental Table 2: Healthcare resource utilization and unit costs (per jurisdiction)

| Cost Categories | Natural Units | Unit Cost | Total Cost | Source |
|-----------------|---------------|-----------|------------|--------|
|-----------------|---------------|-----------|------------|--------|

|                                                                                                                                                                                                                                                                                                                                                                                                                                                                                                                                                                                                                                                                                                                                                                                                                                                                                                                                                                                                                                                                                                                                                                                                                                                                                                                                                                                                                                                               |  |  |  |  |
|---------------------------------------------------------------------------------------------------------------------------------------------------------------------------------------------------------------------------------------------------------------------------------------------------------------------------------------------------------------------------------------------------------------------------------------------------------------------------------------------------------------------------------------------------------------------------------------------------------------------------------------------------------------------------------------------------------------------------------------------------------------------------------------------------------------------------------------------------------------------------------------------------------------------------------------------------------------------------------------------------------------------------------------------------------------------------------------------------------------------------------------------------------------------------------------------------------------------------------------------------------------------------------------------------------------------------------------------------------------------------------------------------------------------------------------------------------------|--|--|--|--|
| <p>Study-related drugs</p> <ul style="list-style-type: none"> <li>• probiotics (<i>Lactobacillus rhamnosus GG</i>) □ antibiotics:       <ul style="list-style-type: none"> <li>○ piperacillin-tazobactam</li> <li>○ ceftriaxone</li> <li>○ ceftazidime</li> <li>○ azithromycin</li> <li>○ vancomycin</li> <li>○ metronidazole           <ul style="list-style-type: none"> <li>○ levofloxacin</li> <li>○ imipenem</li> <li>○ meropenem</li> <li>○ amoxicillin-clavulin</li> <li>○ cefuroxime</li> <li>○ linezolid</li> <li>○ cefazolin</li> <li>○ cloxacillin</li> <li>○ ciprofloxacin</li> <li>○ gentamicin</li> <li>○ trimethoprim-sulfamethoxazole</li> </ul> </li> </ul> </li> <li>• steroids       <ul style="list-style-type: none"> <li>○ dexamethasone</li> <li>○ methylprednisone</li> <li>○ hydrocortisone</li> <li>○ prednisone</li> </ul> </li> <li>• stress ulcer prophylaxis       <ul style="list-style-type: none"> <li>○ cimetidine</li> <li>○ ranitidine</li> <li>○ famotidine</li> <li>○ nizatidine</li> <li>○ lansoprazole</li> <li>○ dexlansoprazole</li> <li>○ pantoprazole</li> <li>○ esomeprazole</li> <li>○ omeprazole</li> <li>○ rabeprazole</li> </ul> </li> <li>• laxatives/motility agents       <ul style="list-style-type: none"> <li>○ domperidone</li> <li>○ metoclopramide</li> <li>○ erythromycin</li> <li>○ senna</li> <li>○ dulcolax</li> <li>○ golytely</li> <li>○ glycerin</li> <li>○ lactulose</li> </ul> </li> </ul> |  |  |  |  |
|---------------------------------------------------------------------------------------------------------------------------------------------------------------------------------------------------------------------------------------------------------------------------------------------------------------------------------------------------------------------------------------------------------------------------------------------------------------------------------------------------------------------------------------------------------------------------------------------------------------------------------------------------------------------------------------------------------------------------------------------------------------------------------------------------------------------------------------------------------------------------------------------------------------------------------------------------------------------------------------------------------------------------------------------------------------------------------------------------------------------------------------------------------------------------------------------------------------------------------------------------------------------------------------------------------------------------------------------------------------------------------------------------------------------------------------------------------------|--|--|--|--|

|                                                                                                                                                                                                                                                                                                                                                                                                                                                                                                         |  |  |  |  |
|---------------------------------------------------------------------------------------------------------------------------------------------------------------------------------------------------------------------------------------------------------------------------------------------------------------------------------------------------------------------------------------------------------------------------------------------------------------------------------------------------------|--|--|--|--|
| <ul style="list-style-type: none"> <li>○ colace ○ citromag ○ PegLyte ○ pancreatic enzymes</li> <li>○ enema</li> <li>□ opiates ○ morphine ○ hydromorphone ○ demerol ○ fentanyl ○ oxycodone ○ percocets</li> </ul>                                                                                                                                                                                                                                                                                        |  |  |  |  |
| <p>Laboratory testing</p> <ul style="list-style-type: none"> <li>• complete blood count</li> <li>• creatinine</li> <li>• arterial blood gas</li> <li>• lactate</li> <li>• albumin</li> <li>• blood cultures</li> <li>• urine cultures</li> <li>• sputum/tracheal aspirate/bronchoalveolar lavage cultures</li> <li>• <i>C. difficile</i> polymerase chain reaction (PCR), toxin assays, ELISA, cell culture, LAMP</li> <li>• other aerobic/anaerobic cultures ○ thoracentesis ○ paracentesis</li> </ul> |  |  |  |  |
| <p>Personnel (<i>per diem</i> or <i>hourly wage</i>)</p> <ul style="list-style-type: none"> <li>• most responsible physician ○ ICU ○ Hospital</li> <li>• consultation physicians</li> <li>• nursing</li> <li>• pharmacist</li> <li>• respiratory therapist</li> <li>• physical therapist</li> <li>• social work</li> <li>• ICU administrative and/or clerical staffing</li> </ul>                                                                                                                       |  |  |  |  |

|                                                                                                                                                                                                                                   |  |  |  |  |
|-----------------------------------------------------------------------------------------------------------------------------------------------------------------------------------------------------------------------------------|--|--|--|--|
| <p>Radiology</p> <ul style="list-style-type: none"><li>• portable chest or abdominal radiographs</li><li>• computerized tomography (CT) scan: chest, abdomen, pelvis, sinusitis, head</li><li>• MRI: head, chest, joint</li></ul> |  |  |  |  |
| <p><input type="checkbox"/> abdominal ultrasound</p>                                                                                                                                                                              |  |  |  |  |

|                                                                                                                                                                                                                                                                                                                                                                                                                                                                                                                                                                                                                                                                                                                                                                                                                                                                                                                                                                                                                                                                                                                                                                                                                                                                                                                                                                 |  |  |  |  |
|-----------------------------------------------------------------------------------------------------------------------------------------------------------------------------------------------------------------------------------------------------------------------------------------------------------------------------------------------------------------------------------------------------------------------------------------------------------------------------------------------------------------------------------------------------------------------------------------------------------------------------------------------------------------------------------------------------------------------------------------------------------------------------------------------------------------------------------------------------------------------------------------------------------------------------------------------------------------------------------------------------------------------------------------------------------------------------------------------------------------------------------------------------------------------------------------------------------------------------------------------------------------------------------------------------------------------------------------------------------------|--|--|--|--|
| <p>Procedural costs:</p> <ul style="list-style-type: none"> <li>• central venous catheter, peripherally inserted central catheter, arterial lines</li> <li>• chest tube</li> <li>• naso- or oro-gastric tube</li> <li>• percutaneous endoscopic gastrostomy (PEG) tube</li> <li>• tube feed</li> <li>• fiber</li> <li>• protein supplement</li> <li>• ventilator circuit changes</li> <li>• endotracheal tubes (with or without subglottic suction)</li> <li>• invasive ventilation (ventilator days) <ul style="list-style-type: none"> <li>○ heat moisture exchange</li> <li>○ heated humidifier</li> </ul> </li> <li>• non-invasive positive pressure ventilation</li> <li>• high-flow nasal cannula</li> <li>• vasopressor/inotropic agents</li> <li>• VAP prevention bundles <ul style="list-style-type: none"> <li>○ chlorhexidine usage</li> <li>○ bacterial filters</li> <li>○ oral decontamination</li> <li>○ gut decontamination</li> <li>○ oral antibiotic paste</li> </ul> </li> <li>• colonoscopy (cautery, epinephrine injection)</li> <li>• echocardiograms (transthoracic/transesophageal)</li> <li>• bronchoscopy</li> <li>• thoracostomy</li> <li>• tracheostomy</li> <li>• interventional radiology drain</li> <li>• intermittent hemodialysis</li> <li>• continuous renal replacement therapy</li> <li>• fecal management device</li> </ul> |  |  |  |  |
|-----------------------------------------------------------------------------------------------------------------------------------------------------------------------------------------------------------------------------------------------------------------------------------------------------------------------------------------------------------------------------------------------------------------------------------------------------------------------------------------------------------------------------------------------------------------------------------------------------------------------------------------------------------------------------------------------------------------------------------------------------------------------------------------------------------------------------------------------------------------------------------------------------------------------------------------------------------------------------------------------------------------------------------------------------------------------------------------------------------------------------------------------------------------------------------------------------------------------------------------------------------------------------------------------------------------------------------------------------------------|--|--|--|--|

|                                                                                                                                                                                                                                         |  |  |  |  |
|-----------------------------------------------------------------------------------------------------------------------------------------------------------------------------------------------------------------------------------------|--|--|--|--|
| Operative costs <ul style="list-style-type: none"> <li>• laparotomy (toxic megacolon, bowel perforation)</li> <li>• colectomy</li> <li>• thoracotomy</li> <li>• open abdominal wound (vacuum-assisted closure (VAC) devices)</li> </ul> |  |  |  |  |
| <input type="checkbox"/> surgeon<br><input type="checkbox"/> surgical assistant<br><input type="checkbox"/> anesthesiology<br><input type="checkbox"/> nursing                                                                          |  |  |  |  |
| Overhead costs <ul style="list-style-type: none"> <li><input type="checkbox"/> ICU days</li> <li><input type="checkbox"/> ward days</li> </ul>                                                                                          |  |  |  |  |

CT = computerized tomography; ELISA = enzyme-linked immunosorbent assay; ICU = intensive care unit; LAMP = loop-mediated isothermal amplification; MRI = magnetic resonance imaging; NM = nuclear medicine; PEG = percutaneous endoscopic gastrostomy; PCR = polymerase chain reaction; PROSPECT = Probiotics: Prevention of Severe Pneumonia and Endotracheal Colonization Trial; US = United States; VAC = vacuum-assisted closure; VAP = ventilator-associated pneumonia;

Supplemental Table 2: Health economic evaluation assumptions

| Assumption                                                                                                                                                                                                                                                                                                                                                                                                                                                                                                                                                                                                                                                                                                                                                        | Rationale                                                                                                                                                                                                                                                                                                                                                                                                                                                                             |
|-------------------------------------------------------------------------------------------------------------------------------------------------------------------------------------------------------------------------------------------------------------------------------------------------------------------------------------------------------------------------------------------------------------------------------------------------------------------------------------------------------------------------------------------------------------------------------------------------------------------------------------------------------------------------------------------------------------------------------------------------------------------|---------------------------------------------------------------------------------------------------------------------------------------------------------------------------------------------------------------------------------------------------------------------------------------------------------------------------------------------------------------------------------------------------------------------------------------------------------------------------------------|
| <p>Prophylactic and therapeutic probiotic administration outside the ICU</p> <ul style="list-style-type: none"> <li>• If no prophylactic/therapeutic probiotics was used prior to trial enrollment, we will assume study product (<i>Lactobacillus rhamnosus</i> GG prophylaxis or placebo) will be used for duration of stay in the ICU with no other probiotic co-administration;</li> <li>• If open label probiotics were used in the ICU, we will assume study product (<i>Lactobacillus rhamnosus</i> GG prophylaxis or placebo) will still be used for duration of stay in the ICU (coadministered);</li> <li>• After the duration of ICU stay (transfer to the ward), we assume that there will be no further probiotic administration</li> </ul>          | <p>Ward-based/pre-admission ICU prophylactic and therapeutic probiotic administration was not directly measured</p>                                                                                                                                                                                                                                                                                                                                                                   |
| <p>Variability in investigations and treatment practice of disease/illness</p> <ul style="list-style-type: none"> <li>• Based on variability in incidence of disease/illness, we will investigate the incidence of each illness severity, and average resource utilization for a particular illness.</li> <li>• We will utilize the mean costs for a particular illness (we will attempt to directly derive this variability from the case report forms) For patients who undergo multiple investigations, treatment (medications/procedures/surgeries) for a particular disease/illness, we will assume the lowest number of potential interventions to treat the disease/illness, as well as mean resource utilization for such events from PROSPECT</li> </ul> | <p>Various clinical diagnoses will have variability in severity, and therefore, variability in the way they are investigated and treated (i.e. <i>C. difficile</i> could be investigated/treated with only culture assay, abdominal x-ray and antibiotics to colectomy). Based on prior scoping reviews for VAP/CDAD, there will be variability in the resource utilization of each treatment/test based on illness severity, which may drive differences in resource utilization</p> |

|                                                                                                                                                                                                                                                                                                                                                                                                                                                                                                                                                                                                                                                                                                                                                                                                                                                                                                                                                                                                                                                                                                                                                                                                                                                                                                                                                                                                                                                                                                                                                                                                                                                                                                                                                                                                                                                                                                                                                                                                                                                                                                                                                                                                                                  |                                                                                                                                                                                                                                       |
|----------------------------------------------------------------------------------------------------------------------------------------------------------------------------------------------------------------------------------------------------------------------------------------------------------------------------------------------------------------------------------------------------------------------------------------------------------------------------------------------------------------------------------------------------------------------------------------------------------------------------------------------------------------------------------------------------------------------------------------------------------------------------------------------------------------------------------------------------------------------------------------------------------------------------------------------------------------------------------------------------------------------------------------------------------------------------------------------------------------------------------------------------------------------------------------------------------------------------------------------------------------------------------------------------------------------------------------------------------------------------------------------------------------------------------------------------------------------------------------------------------------------------------------------------------------------------------------------------------------------------------------------------------------------------------------------------------------------------------------------------------------------------------------------------------------------------------------------------------------------------------------------------------------------------------------------------------------------------------------------------------------------------------------------------------------------------------------------------------------------------------------------------------------------------------------------------------------------------------|---------------------------------------------------------------------------------------------------------------------------------------------------------------------------------------------------------------------------------------|
| <p>Investigations of other infectious outcomes</p> <ul style="list-style-type: none"> <li>• For those illnesses that are only investigated if positive or indeterminate cultures are detected (i.e. endocarditis), we will assume there is a potential minimum and maximal resource utilization that would be used to investigate/treat a specific diagnosis</li> <li>• Certain assumptions will need to be made for healthcare resource utilization for certain services, investigations, procedures/surgeries, as they may not be explicitly captured in PROSPECT, but can be gleaned indirectly from the case report forms</li> <li>• For example:       <ul style="list-style-type: none"> <li>○ central-line blood stream infections would be assumed to warrant a replacement or previous venous or arterial catheters;</li> <li>○ broncho-alveolar lavage (BAL) cultures were assumed to have a bronchoscopy procedure to perform them</li> <li>○ CDAD was assumed to have an abdominal x-ray (at a minimum) for radiological investigation           <ul style="list-style-type: none"> <li>▪ At a maximum, a proportion of patients would receive at CT abdo, colonoscopy/flexible sigmoidoscopy, laparotomy, colectomy, fecal transplant, vacuum-assisted closure device</li> </ul> </li> <li>○ empyema/lung abscess would be assumed to be diagnosed by CT chest, and treated with a chest tube (with a proportion of patients with tissue plasminogen activator into the pleural cavity, or VATS thoracotomy with decortication and irrigation and debridement)</li> <li>○ abdominal x-rays can be used to count the number of abdominal drains inserted           <ul style="list-style-type: none"> <li>▪ a proportion of patients were assumed to receive an abdominal ultrasound, CT abdo, MRI abdo</li> </ul> </li> <li>○ we will assume that a positive blood culture with specific organisms (known to cause endocarditis) would warrant a transthoracic echocardiogram ± transesophageal echocardiogram;</li> <li>○ confirmed endocarditis would be investigated with a transthoracic echocardiogram ± transesophageal echocardiogram</li> <li>○ mediastinitis would be assumed to be</li> </ul> </li> </ul> | <p>There are certain investigations or interventions that would be expected to be associated with various disease state suspicions (and given correct circumstances, we would assume these would be tested/treated in these ways)</p> |
|----------------------------------------------------------------------------------------------------------------------------------------------------------------------------------------------------------------------------------------------------------------------------------------------------------------------------------------------------------------------------------------------------------------------------------------------------------------------------------------------------------------------------------------------------------------------------------------------------------------------------------------------------------------------------------------------------------------------------------------------------------------------------------------------------------------------------------------------------------------------------------------------------------------------------------------------------------------------------------------------------------------------------------------------------------------------------------------------------------------------------------------------------------------------------------------------------------------------------------------------------------------------------------------------------------------------------------------------------------------------------------------------------------------------------------------------------------------------------------------------------------------------------------------------------------------------------------------------------------------------------------------------------------------------------------------------------------------------------------------------------------------------------------------------------------------------------------------------------------------------------------------------------------------------------------------------------------------------------------------------------------------------------------------------------------------------------------------------------------------------------------------------------------------------------------------------------------------------------------|---------------------------------------------------------------------------------------------------------------------------------------------------------------------------------------------------------------------------------------|



diagnosed by CT or MRI chest

- at a maximum, they would receive an thoracotomy/sternotomy for an I&D and potential VAC dressing
- initiation (on the first day) of intermittent hemodialysis or continuous renal replacement therapy would incur a cost of central venous hemodialysis line placement
- suspected meningitis/encephalitis case would warrant a lumbar puncture ± CT or MRI head;
- osteomyelitis would warrant a NM scan or MRI;
- biliary tract infections would be assumed to have at minimum an abdominal ultrasound;
  - At a maximum, a proportion of patients would receive at CT abdo, ERCP, percutaneous transhepatic cholecystostomy (PTC) tube, cholecystectomy
- pancreatic infections would be assumed to have at minimum an abdominal ultrasound;
  - At a maximum, a proportion of patients would receive at CT abdo, MRI abdo, abdominal drain or aspiration
- typhilitis would be assumed to have at minimum an abdo X-ray;
  - At a maximum, a proportion of patients would receive at CT abdo
- toxic megacolon would be assumed to have at minimum an abdo X-ray;
  - At a maximum, a proportion of patients would receive at CT abdo
- urinary tract infection would be assumed to have at a urinalysis and urine culture
- sinusitis would be assumed to have investigations at baseline
  - At a maximum, a proportion of patients would receive at CT head
- septic arthritis would be assumed to have an aspiration culture at a minimum
  - At a maximum, a proportion of patients would receive an orthopedic surgery for I&D

|                                                                                                                                                                                                                                                                                                                                                                                                                                                |                                                                                                                                                          |
|------------------------------------------------------------------------------------------------------------------------------------------------------------------------------------------------------------------------------------------------------------------------------------------------------------------------------------------------------------------------------------------------------------------------------------------------|----------------------------------------------------------------------------------------------------------------------------------------------------------|
| <ul style="list-style-type: none"> <li>○ PEG tube insertion would be assumed to be placed when 1<sup>st</sup> record on the daily data form of PEG tube utilization (Daily Form 4.2 of 3)</li> <li>○ Tracheostomy insertion would be assumed to be placed when 1<sup>st</sup> record on the daily</li> </ul>                                                                                                                                   |                                                                                                                                                          |
| <p>data form (Daily Form 4.1 of 3 – Mechanical airway in place today)</p>                                                                                                                                                                                                                                                                                                                                                                      |                                                                                                                                                          |
| <p>Imputation of missing data</p> <ul style="list-style-type: none"> <li>□ For those patients with missing data from a clinical outcomes perspective, multiple imputation methods will be utilized – including generalized estimating equations (GEEs)</li> <li>□ For missing unit costs (which are not attainable from public jurisdiction databases or trial site specific inquiries), we will utilize costing -ratio methodology</li> </ul> | <p>We will utilize standard multiple imputation methods to handle missing clinical outcome data, or costing-ratio methodology for missing unit costs</p> |

BAL = broncho-alveolar lavage; CDAD = C. Difficile-associated diarrhea; CT = computerized tomography; CXR = chest x-ray; ERCP = endoscopic retrograde cholangio-pancreatography; ICU = intensive care unit; I&D: irrigation & debridement; MRI = magnetic resonance imaging; NM = nuclear medicine; PEG = percutaneous endoscopic gastrostomy; PCR = polymerase chain reaction; PROSPECT = Probiotics: Prevention of Severe Pneumonia and Endotracheal

Colonization Trial; US = United States; VAC = vacuum-assisted closure; VAP = ventilator-associated pneumonia; VATS = video-assisted thoroscopic surgery
