# Supplementary material for: Economic evaluation alongside the Probiotics to Prevent Severe Pneumonia and Endotracheal Colonization Trial (E-PROSPECT): study protocol
Source: PubMed Central journal article supplement — BMJ Open. 2020 Jun 28;10(6):e036047. doi: 10.1136/bmjopen-2019-036047 (PMC7322334; doi:10.1136/bmjopen-2019-036047), 2020-06-28
Supplement: bmjopen-2019-036047supp003.pdf [file bmjopen-2019-036047supp003.pdf]

Supplemental Table 3: Health economic evaluation assumptions

| Assumption                                                                                                                                                                                                                                                                                                                                                                                                                                                                                                                                                                                                                                                                                                                                                        | Rationale                                                                                                                                                                                                                                                                                                                                                                                                                                                                             |
|-------------------------------------------------------------------------------------------------------------------------------------------------------------------------------------------------------------------------------------------------------------------------------------------------------------------------------------------------------------------------------------------------------------------------------------------------------------------------------------------------------------------------------------------------------------------------------------------------------------------------------------------------------------------------------------------------------------------------------------------------------------------|---------------------------------------------------------------------------------------------------------------------------------------------------------------------------------------------------------------------------------------------------------------------------------------------------------------------------------------------------------------------------------------------------------------------------------------------------------------------------------------|
| <p>Prophylactic and therapeutic probiotic administration outside the ICU</p> <ul style="list-style-type: none"> <li>• If no prophylactic/therapeutic probiotics was used prior to trial enrollment, we will assume study product (<i>Lactobacillus rhamnosus</i> GG prophylaxis or placebo) will be used for duration of stay in the ICU with no other probiotic co-administration;</li> <li>• If open label probiotics were used in the ICU, we will assume study product (<i>Lactobacillus rhamnosus</i> GG prophylaxis or placebo) will still be used for duration of stay in the ICU (co-administered);</li> <li>• After the duration of ICU stay (transfer to the ward), we assume that there will be no further probiotic administration</li> </ul>         | <p>Ward-based/pre-admission ICU prophylactic and therapeutic probiotic administration was not directly measured</p>                                                                                                                                                                                                                                                                                                                                                                   |
| <p>Variability in investigations and treatment practice of disease/illness</p> <ul style="list-style-type: none"> <li>• Based on variability in incidence of disease/illness, we will investigate the incidence of each illness severity, and average resource utilization for a particular illness.</li> <li>• We will utilize the mean costs for a particular illness (we will attempt to directly derive this variability from the case report forms) For patients who undergo multiple investigations, treatment (medications/procedures/surgeries) for a particular disease/illness, we will assume the lowest number of potential interventions to treat the disease/illness, as well as mean resource utilization for such events from PROSPECT</li> </ul> | <p>Various clinical diagnoses will have variability in severity, and therefore, variability in the way they are investigated and treated (i.e. <i>C. difficile</i> could be investigated/treated with only culture assay, abdominal x-ray and antibiotics to colectomy). Based on prior scoping reviews for VAP/CDAD, there will be variability in the resource utilization of each treatment/test based on illness severity, which may drive differences in resource utilization</p> |

|                                                                                                                                                                                                                                                                                                                                                                                                                                                                                                                                                                                                                                                                                                                                                                                                                                                                                                                                                                                                                                                                                                                                                                                                                                                                                                                                                                                                                                                                                                                                                                                                                                                                                                                                                                                                                                                                                                                                                                                                                                                                                                                                                                                                        |                                                                                                                                                                                                                                       |
|--------------------------------------------------------------------------------------------------------------------------------------------------------------------------------------------------------------------------------------------------------------------------------------------------------------------------------------------------------------------------------------------------------------------------------------------------------------------------------------------------------------------------------------------------------------------------------------------------------------------------------------------------------------------------------------------------------------------------------------------------------------------------------------------------------------------------------------------------------------------------------------------------------------------------------------------------------------------------------------------------------------------------------------------------------------------------------------------------------------------------------------------------------------------------------------------------------------------------------------------------------------------------------------------------------------------------------------------------------------------------------------------------------------------------------------------------------------------------------------------------------------------------------------------------------------------------------------------------------------------------------------------------------------------------------------------------------------------------------------------------------------------------------------------------------------------------------------------------------------------------------------------------------------------------------------------------------------------------------------------------------------------------------------------------------------------------------------------------------------------------------------------------------------------------------------------------------|---------------------------------------------------------------------------------------------------------------------------------------------------------------------------------------------------------------------------------------|
| <p>Investigations of other infectious outcomes</p> <ul style="list-style-type: none"> <li>• For those illnesses that are only investigated if positive or indeterminate cultures are detected (i.e. endocarditis), we will assume there is a potential minimum and maximal resource utilization that would be used to investigate/treat a specific diagnosis</li> <li>• Certain assumptions will need to be made for healthcare resource utilization for certain services, investigations, procedures/surgeries, as they may not be explicitly captured in PROSPECT, but can be gleaned indirectly from the case report forms</li> <li>• For example: <ul style="list-style-type: none"> <li>○ central-line blood stream infections would be assumed to warrant a replacement or previous venous or arterial catheters;</li> <li>○ broncho-alveolar lavage (BAL) cultures were assumed to have a bronchoscopy procedure to perform them</li> <li>○ CDAD was assumed to have an abdominal x-ray (at a minimum) for radiological investigation <ul style="list-style-type: none"> <li>▪ At a maximum, a proportion of patients would receive at CT abdo, colonoscopy/flexible sigmoidoscopy, laparotomy, colectomy, fecal transplant, vacuum-assisted closure device</li> </ul> </li> <li>○ empyema/lung abscess would be assumed to be diagnosed by CT chest, and treated with a chest tube (with a proportion of patients with tissue plasminogen activator into the pleural cavity, or VATS thoracotomy with decortication and irrigation and debridement)</li> <li>○ abdominal x-rays can be used to count the number of abdominal drains inserted <ul style="list-style-type: none"> <li>▪ a proportion of patients were assumed to receive an abdominal ultrasound, CT abdo, MRI abdo</li> </ul> </li> <li>○ we will assume that a positive blood culture with specific organisms (known to cause endocarditis) would warrant a transthoracic echocardiogram ± transesophageal echocardiogram;</li> <li>○ confirmed endocarditis would be investigated with a transthoracic echocardiogram ± transesophageal echocardiogram</li> <li>○ mediastinitis would be assumed to be</li> </ul> </li> </ul> | <p>There are certain investigations or interventions that would be expected to be associated with various disease state suspicions (and given correct circumstances, we would assume these would be tested/treated in these ways)</p> |
|--------------------------------------------------------------------------------------------------------------------------------------------------------------------------------------------------------------------------------------------------------------------------------------------------------------------------------------------------------------------------------------------------------------------------------------------------------------------------------------------------------------------------------------------------------------------------------------------------------------------------------------------------------------------------------------------------------------------------------------------------------------------------------------------------------------------------------------------------------------------------------------------------------------------------------------------------------------------------------------------------------------------------------------------------------------------------------------------------------------------------------------------------------------------------------------------------------------------------------------------------------------------------------------------------------------------------------------------------------------------------------------------------------------------------------------------------------------------------------------------------------------------------------------------------------------------------------------------------------------------------------------------------------------------------------------------------------------------------------------------------------------------------------------------------------------------------------------------------------------------------------------------------------------------------------------------------------------------------------------------------------------------------------------------------------------------------------------------------------------------------------------------------------------------------------------------------------|---------------------------------------------------------------------------------------------------------------------------------------------------------------------------------------------------------------------------------------|

|                                                                                                                                                                                                                                                                                                                                                                                                                                                                                                                                                                                                                                                                                                                                                                                                                                                                                                                                                                                                                                                                                                                                                                                                                                                                                                                                                                                                                                                                                                                                                                                                                                                                                                                                                                                                                                                                                                                                                                                                                                                                                                                                                                                                                                                                                                              |  |
|--------------------------------------------------------------------------------------------------------------------------------------------------------------------------------------------------------------------------------------------------------------------------------------------------------------------------------------------------------------------------------------------------------------------------------------------------------------------------------------------------------------------------------------------------------------------------------------------------------------------------------------------------------------------------------------------------------------------------------------------------------------------------------------------------------------------------------------------------------------------------------------------------------------------------------------------------------------------------------------------------------------------------------------------------------------------------------------------------------------------------------------------------------------------------------------------------------------------------------------------------------------------------------------------------------------------------------------------------------------------------------------------------------------------------------------------------------------------------------------------------------------------------------------------------------------------------------------------------------------------------------------------------------------------------------------------------------------------------------------------------------------------------------------------------------------------------------------------------------------------------------------------------------------------------------------------------------------------------------------------------------------------------------------------------------------------------------------------------------------------------------------------------------------------------------------------------------------------------------------------------------------------------------------------------------------|--|
| <p>diagnosed by CT or MRI chest</p> <ul style="list-style-type: none"> <li>▪ at a maximum, they would receive an thoracotomy/sternotomy for an I&amp;D and potential VAC dressing</li> <li>○ initiation (on the first day) of intermittent hemodialysis or continuous renal replacement therapy would incur a cost of central venous hemodialysis line placement</li> <li>○ suspected meningitis/encephalitis case would warrant a lumbar puncture ± CT or MRI head;</li> <li>○ osteomyelitis would warrant a NM scan or MRI;</li> <li>○ biliary tract infections would be assumed to have at minimum an abdominal ultrasound; <ul style="list-style-type: none"> <li>▪ At a maximum, a proportion of patients would receive at CT abdo, ERCP, percutaneous transhepatic cholecystostomy (PTC) tube, cholecystectomy</li> </ul> </li> <li>○ pancreatic infections would be assumed to have at minimum an abdominal ultrasound; <ul style="list-style-type: none"> <li>▪ At a maximum, a proportion of patients would receive at CT abdo, MRI abdo, abdominal drain or aspiration</li> </ul> </li> <li>○ typhilitis would be assumed to have at minimum an abdo X-ray; <ul style="list-style-type: none"> <li>▪ At a maximum, a proportion of patients would receive at CT abdo</li> </ul> </li> <li>○ toxic megacolon would be assumed to have at minimum an abdo X-ray; <ul style="list-style-type: none"> <li>▪ At a maximum, a proportion of patients would receive at CT abdo</li> </ul> </li> <li>○ urinary tract infection would be assumed to have at a urinalysis and urine culture</li> <li>○ sinusitis would be assumed to have investigations at baseline <ul style="list-style-type: none"> <li>▪ At a maximum, a proportion of patients would receive at CT head</li> </ul> </li> <li>○ septic arthritis would be assumed to have an aspiration culture at a minimum <ul style="list-style-type: none"> <li>▪ At a maximum, a proportion of patients would receive an orthopedic surgery for I&amp;D</li> </ul> </li> <li>○ PEG tube insertion would be assumed to be placed when 1<sup>st</sup> record on the daily data form of PEG tube utilization (Daily Form 4.2 of 3)</li> <li>○ Tracheostomy insertion would be assumed to be placed when 1<sup>st</sup> record on the daily</li> </ul> |  |
|--------------------------------------------------------------------------------------------------------------------------------------------------------------------------------------------------------------------------------------------------------------------------------------------------------------------------------------------------------------------------------------------------------------------------------------------------------------------------------------------------------------------------------------------------------------------------------------------------------------------------------------------------------------------------------------------------------------------------------------------------------------------------------------------------------------------------------------------------------------------------------------------------------------------------------------------------------------------------------------------------------------------------------------------------------------------------------------------------------------------------------------------------------------------------------------------------------------------------------------------------------------------------------------------------------------------------------------------------------------------------------------------------------------------------------------------------------------------------------------------------------------------------------------------------------------------------------------------------------------------------------------------------------------------------------------------------------------------------------------------------------------------------------------------------------------------------------------------------------------------------------------------------------------------------------------------------------------------------------------------------------------------------------------------------------------------------------------------------------------------------------------------------------------------------------------------------------------------------------------------------------------------------------------------------------------|--|

|                                                                                                                                                                                                                                                                                                                                                                                                                                               |                                                                                                                                                          |
|-----------------------------------------------------------------------------------------------------------------------------------------------------------------------------------------------------------------------------------------------------------------------------------------------------------------------------------------------------------------------------------------------------------------------------------------------|----------------------------------------------------------------------------------------------------------------------------------------------------------|
| <p>data form (Daily Form 4.1 of 3 – Mechanical airway in place today)</p>                                                                                                                                                                                                                                                                                                                                                                     |                                                                                                                                                          |
| <p>Imputation of missing data</p> <ul style="list-style-type: none"> <li>• For those patients with missing data from a clinical outcomes perspective, multiple imputation methods will be utilized – including generalized estimating equations (GEEs)</li> <li>• For missing unit costs (which are not attainable from public jurisdiction databases or trial site-specific inquiries), we will utilize costing-ratio methodology</li> </ul> | <p>We will utilize standard multiple imputation methods to handle missing clinical outcome data, or costing-ratio methodology for missing unit costs</p> |

BAL = broncho-alveolar lavage; CDAD = C. Difficile-associated diarrhea; CT = computerized tomography; CXR = chest x-ray; ERCP = endoscopic retrograde cholangio-pancreatography; ICU = intensive care unit; I&D: irrigation & debridement; MRI = magnetic resonance imaging; NM = nuclear medicine; PEG = percutaneous endoscopic gastrostomy; PCR = polymerase chain reaction; PROSPECT = Probiotics: Prevention of Severe Pneumonia and Endotracheal Colonization Trial; US = United States; VAC = vacuum-assisted closure; VAP = ventilator-associated pneumonia; VATS = video-assisted thorascopic surgery
